## **A *Drosophila* glial cell atlas reveals that transcriptionally defined cell types can be morphologically diverse**

Inês Lago-Baldaia<sup>1</sup>, Maia Cooper<sup>1§</sup>, Austin Seroka<sup>2,3§</sup>, Chintan Trivedi<sup>1</sup>, Gareth T. Powell<sup>1</sup>, Stephen Wilson<sup>1</sup>, Sarah Ackerman<sup>4\*</sup> and Vilaiwan M Fernandes<sup>1\*</sup>

1. Department of Cell and Developmental Biology, University College London, London, UK.
2. Institute of Neuroscience, Howard Hughes Medical Institute, University of Oregon, Eugene, OR, USA.
3. Current address: Basic Sciences Division, Fred Hutchinson Cancer Research Center, Seattle, WA 98109, USA.
4. Washington University School of Medicine, Saint Louis, MO, USA.

<sup>§</sup>These authors contributed equally to this work.

\*co-correspondence to [sarah.ackerman@wustl.edu](mailto:sarah.ackerman@wustl.edu) and [vilaiwan.fernandes@ucl.ac.uk](mailto:vilaiwan.fernandes@ucl.ac.uk)

## Abstract

Morphology is a key defining feature of neuronal identity. Like neurons, glia display diverse morphologies, both across and within glial classes. In the *Drosophila* central nervous system, glia are categorized into five main classes (outer and inner surface glia, cortex glia, ensheathing glia, and astrocytes), which also show within-class morphological diversity (morphotypes). Whether morphological differences reflect underlying transcriptional heterogeneity is unclear. We analysed and validated single cell RNA sequencing data of *Drosophila* glia in two well-characterized tissues from distinct developmental stages, containing distinct circuit types: the embryonic ventral nerve cord (motor) and the adult optic lobes (sensory). Our analysis identified a new morphologically and transcriptionally distinct surface glial population in the ventral nerve cord. However, many glial morphotypes could not be distinguished transcriptionally, and indeed, embryonic and adult astrocytes were transcriptionally analogous despite differences in developmental stage and circuit type. While we did detect extensive within-class transcriptomic diversity for optic lobe glia, this could be explained entirely by glial residence in the most superficial neuropil (lamina) and an associated enrichment for immune-related functions. In summary, we generated the first single-cell transcriptomic atlas of glia in *Drosophila*, and our extensive *in vivo* validation suggests that morphology is not set by an intrinsic transcriptional program. Instead, we propose that glia adopt morphological and functional states in response to their local environment. This atlas will serve as a resource for the community to probe glial diversity and function.

## Introduction

Nervous systems contain more distinct cell identities than any other organ. This cellular diversity underlies the complexity and multifunctionality of circuits and processing networks in the brain and, thus, defines the breadth of an animal's behavioural repertoire. Not surprisingly, categorising neural cell types has long been, and continues to be, a major endeavour in the field. Although much emphasis has been placed on categorising neuronal diversity, we know much less about the extent of glial diversity. Given their pivotal roles in every aspect of nervous system development and function (Allen and Lyons, 2018; Lago-Baldaia et al., 2020), understanding glial diversity is also imperative.

Neuronal types were first identified based on morphological differences (Fischbach and Dittrich, 1989; Golgi, 1903; Ramón y Cajal, 1899; White et al., 1986). Recent advances in single-cell RNA-sequencing (scRNA-seq) technologies have provided a sensitive and high-throughput approach to classify cellular diversity. Studies using this methodology have uncovered many novel neuronal types, revealing that in most instances, neuronal transcriptomic diversity correlates well with physiological traits like morphology (Bakken et al., 2021; Cadwell et al., 2016; Davie et al., 2018; Konstantinides et al., 2018; Kurmangaliyev et al., 2020; Li et al., 2017; Özel et al., 2021; Reilly et al., 2020), with some notable exceptions (Gouwens et al., 2020, 2019; Que et al., 2021). In *Drosophila*, scRNA-seq studies determined that neurons previously defined by morphology have unique transcriptomic signatures, and transcriptomic studies have identified new neuronal types with unique morphologies that were previously missed (Davie et al., 2018; Konstantinides et al., 2018; Kurmangaliyev et al., 2020; Li et al., 2017; Özel et al., 2021).

In invertebrate and vertebrate brains, neurons are surrounded and supported by a heterogeneous group of support cells termed glia. Morphological diversity among glia has been documented alongside that of neurons for over a century (Ramón y Cajal, 1899). This morphological heterogeneity exists not only between broad glial classes (*i.e.* astrocytes, oligodendrocytes, Schwann cells and microglia) but also within classes (Foerster et al., 2019; Harty and Monk, 2017; Kamen et al., 2022; Khakh and Sofroniew, 2015). It has long been appreciated that mammalian astrocytes from different brain regions vary in morphology (Lanjakornsiripan et al., 2018; Ramón y Cajal, 1899; reviewed in detail in Zhou et al., 2019), and recent advances in RNA-seq technologies have revealed regionalized molecular diversity in astrocytes and other CNS glial cell types (*e.g.* oligodendrocyte progenitor cells and microglia) (Batiuk et al., 2020; Bayraktar et al., 2020; Chai et al., 2017; Dimou and Gallo, 2015; Grabert et al., 2016; Marques et al., 2018; Spitzer et al., 2019). Confoundingly, astrocytes are known to be highly plastic cells. Most notably, in response to injury, astrocytes undergo a process called astrocytosis, become “reactive,” and alter their morphology dramatically (Escartin et al., 2021). It is clear that astrocyte reactivity represents a change in cell state due to underlying differences in

environment. Thus, in healthy conditions, it is difficult to distinguish whether the morphological diversity of astrocytes is a consequence of cell-fate diversity and/or cell-state (*i.e.* plasticity dictated by underlying circuit architecture or other environmental conditions). In other words, is glial morphology a reliable indicator of cellular identity?

The *Drosophila* nervous system has emerged as an excellent platform for studying glial development and function (Bittern et al., 2021; Freeman, 2015; Freeman and Doherty, 2006; Lago-Baldaia et al., 2020). *Drosophila* glia share several key morphological and functional attributes with their vertebrate counterparts, including maintaining neurotransmitter and ionic homeostasis, providing trophic support for neurons, acting as immune cells, and modifying neural circuit function (Bittern et al., 2021; Freeman, 2015; Freeman and Doherty, 2006; Lago-Baldaia et al., 2020). Although *Drosophila* has a simplified nervous system with reduced numbers of glia relative to mammals, striking morphological diversity exists between and within glial cell classes during development and in the adult (Edwards et al., 2012; Edwards and Meinertzhagen, 2010; Kremer et al., 2017; Peco et al., 2016). As scRNA-seq transcriptional datasets of neural tissues, including glia, already exist for many developmental stages (Avalos et al., 2019; Davie et al., 2018; Konstantinides et al., 2022; Kurmangaliyev et al., 2020; Li et al., 2022; Özel et al., 2021; Seroka et al., 2022), *Drosophila* is an ideal model to determine the correlation between transcriptional state and morphology.

In the *Drosophila* CNS, neuropils contain synaptic connections, while neuronal cell bodies are located at the cortex, around the periphery of neuropils; axon tracts connect different neuropils to each other. *Drosophila* glia can be categorised based on morphology and by their association with these anatomical structures as either outer or inner surface glia, cortex glia, ensheathing glia, or astrocytes (Figures 1 and 2). Surface glia comprise two sheet-like glia called the perineurial and subperineurial glia (Freeman, 2015; Pogodalla et al., 2022). Together these form a double-layered contiguous surface that spans the nervous system, which acts as a blood-brain barrier (BBB) (Freeman, 2015; Pogodalla et al., 2022). Cortex glia envelop neuronal cell bodies in cortical regions of the CNS, whereas ensheathing glia can wrap axonal tracts between neuropils (*aka* tract ensheathing glia) or wrap neuropil borders (Freeman, 2015). Astrocytes also inhabit neuropil regions with ensheathing glia, but extend many fine projections into the neuropil to associate with neuronal synapses, akin to vertebrate astrocytes (Freeman, 2015; Stork et al., 2014). As in vertebrates, *Drosophila* glia display morphological diversity not only between these broad classes, but also within (Edwards and Meinertzhagen, 2010; Kremer et al., 2017; Richier et al., 2017). For example, in the highly ordered visual system, astrocytes of distinct morphologies (morphotypes) can be found across neuropils and within the same neuropil (Edwards et al., 2012; Richier et al., 2017). Whether these morphotypes correspond to distinct subtypes with unique transcriptional profiles and functions is not known.

Here, we leverage the simple and tractable *Drosophila* nervous system to ask whether the morphological diversity observed within glia is indicative of cell-type diversity. We generated and validated a single cell atlas of all glial classes in two distinct *Drosophila* circuits— the embryonic ventral nerve cord and the adult optic lobe. We chose these circuits as they are well-characterized with many existing tools and reagents, because they span two different circuit types (sensorimotor *versus* pure sensory), and they represent two distinct developmental stages. We identified several new glial morphotypes but found that largely, these did not match to any transcriptionally-defined subtypes. Moreover, we found that class-specific transcriptomes were conserved from embryo to adult, despite changes in circuit location and developmental stage. One exception was the glia of the optic lobe lamina, which accounted for the majority of glial diversity at a transcriptional level. The lamina and its associated glia lie in close proximity to an environmental interface, positioned immediately below photoreceptors of the compound eye, and were enriched for genes with immune-related function. Our data suggest that within-class (*e.g.* astrocytes) glial morphotypes are not overtly transcriptionally distinct subtypes. Instead, we propose that glia adopt different morphological and functional states in response to cues from their local environment.

## Results

### Morphological diversity of embryonic *Drosophila* glia

To determine how the molecular and morphological diversity of glia intersect, we first characterised glial cell morphology across distinct *Drosophila* brain regions and developmental stages. First, we focused on glia in the ventral nerve cord (VNC, akin to the vertebrate spinal cord) in the late embryonic (stage 17) CNS. The VNC contains a single neuropil regionalised into dorsal motor and ventral sensory processing domains (Mark et al., 2021; Zlatic et al., 2009). We wondered whether this regionalisation of distinct circuit-types may also extend to glial specialisation (morphological, transcriptional, or both). The developing VNC contains five major glial cell classes: astrocytes, ensheathing glia, cortex glia, and two types of surface glia (Freeman, 2015). We used enhancer trap Gal4 drivers expressed in each of these glial cell classes to sparsely label cells using the multi-colour flip-out (MCFO) cassette. We then visualized single cell glial morphology at 0 hours after larval hatching (0h ALH) to assess morphological diversity both within and between classes (Figure 1).

#### VNC surface glia

To analyse surface glia morphology in the VNC, we used the *CG5080-Gal4* and *moody-Gal4* drivers to generate MCFO clones. Previous reports identified two types of surface glia, perineurial on

the outer surface of the VNC (*CG5080+*) and subperineurial glia (*moody+*) lying below perineurial glia (Freeman, 2015; Pogodalla et al., 2022). When we generated clones in the VNC with *CG5080-Gal4*, we observed two distinct perineurial glia cell morphologies. First, apical perineurial glia were found loosely tiled around the periphery of the VNC and were distinguished by a fibrous morphology (Figure 1B). We also observed a new morphological type which we termed midline-associated perineurial (MAP) glia (Figure 1A, C, D). These were located exclusively on the ventral surface of the VNC and sent a single projection dorsally, which abutted the neuropil at the midline. MAP glia and apical perineurial glia tiled with each other at the outer surface of the VNC, which identified them as a putative subtype of perineurial glia. By contrast, using a driver for subperineurial glia (*moody-Gal4*), we observed only large squamous cells located immediately adjacent to neuronal cell bodies (Figure 1E), similar to previous descriptions (Pogodalla et al., 2022). We did not observe any substantial differences in subperineurial morphology across N=95 clones from N=12 brains. Thus, perineurial glia could be characterised into two morphologically distinct populations: the apical perineurial glia, which have been described previously, and the MAP glia, which we describe here (Fig 1 A-E).

#### VNC cortex glia, ensheathing glia and astrocytes

*Drosophila* have three glial cell classes that collectively perform the functions of vertebrate astrocytes: cortex glia, ensheathing glia and astrocytes (Freeman, 2015). To analyse their morphology, we used the *R54H02(wrapper fragment)-Gal4*, *Eaat2-Gal4*, and *alrm-Gal4* drivers to generate MCFO clones, respectively. In the VNC, cortex glia (*wrapper+*) varied in size but exhibited one morphotype. In brief, all cortex glia extended a large membrane sheet to envelop neighbouring neuronal cell bodies. Furthermore, each cortex glia extended processes to contact the apical and basal surfaces of the cortex, which were occupied by other glial cell membranes (Figure 1F; N=295 clones from N=13 brains) (Freeman, 2015). Similarly, we saw little variability in ensheathing glia (*Eaat2+*) morphology. As shown previously, ensheathing glia in the VNC wrapped the border between the cortex and neuropil with no projections extending into the neuropil itself (Figure 1G; N=190 clones from N=11 brains). By contrast, we observed two morphotypes when we labelled astrocytes (*alrm+*) by MCFO (Figure 1H), which we named type 1 and type 2 (Figure 1A, H; N=115 clones from N=13 brains). Type 1 astrocytes extended highly ramified processes throughout the neuropil (Figure 1A, H), and represented  $62 \pm 5$  SEM% of clones. Type 2 astrocytes elaborated some processes within the neuropil, but also extended a single radial process along the border of the neuropil and cortex (Figure 1A, H), and represented  $38 \pm 5$  SEM% of clones. Type 2 astrocytes were distinguished from ensheathing glia by nuclear expression of Prospero (Figure 1H) (Peco et al., 2016).

Interestingly, type 1 and type 2 astrocytes also differed by their position in the VNC, with type 1 astrocytes located primarily laterally and type 2 astrocytes found primarily dorsoventrally.

Thus, within the early larval VNC, each broad glial class can be defined by a single stereotyped morphological appearance, except astrocytes (type 1 and type 2) and perineurial glia (apical and midline-associated) which both had two morphotypes, suggesting previously unappreciated diversity.

### **Optic lobe glia display morphological diversity within glial classes**

In addition to the relatively simple VNC, we also focused on the adult optic lobe, which is more structurally complex than the VNC with four distinct neuropils called the lamina, medulla, lobula and lobula plate (Figure 2A). Several other groups have characterised the morphology of each of the five major glial classes (perineurial, subperineurial, cortex, ensheathing and astrocyte) present in the optic lobe in detail (Edwards et al., 2012; Kremer et al., 2017; Richier et al., 2017). Therefore, we used previously characterised Gal4 lines (Chotard and Salecker, 2007; Edwards et al., 2012; Kremer et al., 2017) (Figure 2- supplementary figure S1) to generate MCFO clones to visualise glial morphologies and validate morphological diversity within each class (Summarized in Figure 2; see Materials and Methods for more details).

#### Optic lobe surface glia

Briefly, we used *R85G01-Gal4* to label perineurial glia that covered the medulla, lobula, and lobula plate neuropils and observed morphological homogeneity across these three neuropils (Figure 2A, B) (Kremer et al., 2017). We used *R10C12-Gal4* to label chalice glia, a putative perineurial glial population found at the margins of the lamina neuropil (Figure 2A, C). Finally, we used *R47G01-Gal4* to label fenestrated glia, specialised perineurial glia found over the lamina cortex (Figure 2A, D) (Kremer et al., 2017). We then used *R54C07-Gal4* to label subperineurial glia of the optic lobe (Kremer et al., 2017). Subperineurial glia of the same morphology covered the medulla, lobula, and lobula plate neuropils (Figure 2A, E). In the lamina, *R54C07-Gal4* also labelled carpet glia, a specialised subperineurial glia found at the margins of the lamina neuropil (Edwards et al., 2012; Kremer et al., 2017) and pseudo-cartridge glia, a specialised subperineurial glia adjacent to the lamina cortex (Figure 2A, F,G). Thus, we validated each of the previously annotated surface glial subtypes (Edwards et al., 2012; Kremer et al., 2017).

#### Optic lobe cortex glia, ensheathing glia and astrocytes

To label optic lobe cortex glia, we used *R54H02-Gal4* (Gal4 driven by a fragment of the *wrapper* locus) and *R53H12-Gal4* (Kremer et al., 2017). *R54H02-Gal4* labelled cortex glia in the

medulla, lobula and lobula plate, which were morphologically indistinguishable across the three neuropils, and the proximal satellite glia, a lamina-specific cortex glia located in the proximal lamina (Figure 2A, H, I) (Kremer et al., 2017). *53H12-Gal4* labelled the distal satellite glia, another lamina-specific cortex glia population, located in the distal lamina (Figure 2A, J) (Kremer et al., 2017).

To visualize optic lobe ensheathing glia, we used *R56F03-Gal4*, *R35E04-Gal4*, and *R53H12-Gal4* (Kremer et al., 2017). *R56F03-Gal4* labelled lamina, medulla, lobula, and lobula plate ensheathing glia (Kremer et al., 2017). The medulla exhibited two ensheathing glial morphologies: one in the distal medulla, which sent a primary process to layer M7 and one in the lateral medulla which sent a primary process along layer M7 (Figure 2A, K-M)(Kremer et al., 2017). Ensheathing glia of the lobula and lobula plate showed more complex branching patterns compared to the medulla and were less stereotyped (Figure 2A, K, N). *R56F03-Gal4* also labelled the marginal glia, a lamina-specific ensheathing glia (not shown) (Kremer et al., 2017), which we labelled specifically by *R35E04-Gal4* (Figure 2A, O). Finally, *R53H12-Gal4* labelled chiasm glia, a specialised ensheathing glia (tract ensheathing glia), which ensheaths tracts of neuronal projections between neuropils. Chiasm glia displayed two distinct morphologies: one associated with the chiasm between the lamina and medulla (outer chiasm), and the other associated with the chiasm between the medulla, lobula and lobula plate chiasm (inner chiasm) (Figure 2A, P)(Edwards et al., 2012; Kremer et al., 2017).

Finally, to label optic lobe astrocytes we used *R86E01-Gal4* (Kremer et al., 2017). In the medulla, we observed four distinct astrocyte morphologies as previously reported: two in the distal medulla, a third in the lateral medulla, and a fourth in the proximal medulla (also called chandelier glia) (Figure 2A, Q-T)(Edwards et al., 2012; Kremer et al., 2017; Richier et al., 2017). In addition, the lobula and lobula plate were together populated by three morphologically distinct astrocyte populations (Figure 2A, Q, U, V). Finally, *R86E01-Gal4* also labelled astrocytes of the lamina, called epithelial glia (not shown; shown instead with *repo-Gal4*) (Figure 2A, W).

In sum, all major classes of optic lobe glia showed some regionalized morphological differences (Figure 2A). Additionally, for some glial classes — cortex glia in the lamina, ensheathing glia in the medulla, and astrocytes in the medulla, lobula and lobula plate — we observed morphologically distinct populations in close proximity to each other within the same neuropil. Thus, optic lobe glia exhibited much more morphological diversity than VNC glia, prompting us to ask how much transcriptional diversity exists between glia at embryonic and adult stages. Furthermore, could we use transcriptional profiling to define morphotypes as unique glial classes?



## A transcriptomic atlas of embryonic and young adult *Drosophila* glia

To correlate glial cell morphology and transcriptional identity during development, we performed scRNA-seq on late-stage *Drosophila* embryos (stage 17). Whole embryos were dissociated into a single cell suspension, filtered, prepared using the 10X Genomics single cell pipeline, and sequenced via Illumina sequencing (see Materials and Methods). At this stage and through larval stage 1, we quantified an average of  $528 \pm 9$  SEM glial cells in the CNS (labelled by the glial-specific marker Reversed polarity, or Repo) that were localized in the VNC, and  $188 \pm 9$  SEM glial cells in the brain lobes (N=8 brains per anatomical region). Thus, our dataset was enriched for VNC glia, which make up 74% of the CNS glia at this time ( $p < .0001$ , one-way ANOVA). Following sequencing, cells were clustered based on differential gene expression using Seurat, and glial clusters were computationally isolated by expression of the pan-glial markers *reversed polarity (repo)*, and the astrocyte-specific markers *GABA transporter (Gat)* and *astrocytic leucine-rich repeat molecule (alrm)* (see Materials and Methods and Figure 3 for further details).

For the optic lobes, we used data from two recent studies that performed scRNA-seq on whole optic lobe tissue at the young adult stage and throughout pupal development (Kurmangaliyev et al., 2020; Özel et al., 2021). Despite slight differences in experimental approaches between these studies (see Figure 3 for summary), both analyses generated 19 glial clusters for the young adult optic lobes (Figure 3- supplementary figure S1A,B); however, since both studies focused on neuronal development, glial clusters were not annotated or analysed (Kurmangaliyev et al., 2020; Özel et al., 2021). Since glial cells constitute only 10-15% of neural cells in the *Drosophila* nervous system (Kremer et al., 2017), we sought to increase the number of cells analysed to maximise our ability to identify rare cell types. Therefore, we first isolated glial cells based on their original annotation in each study (*i.e. repo* expression) and then combined the closest developmental stages using the Seurat integration pipeline to remove batch effects between libraries (Figure 3 and Materials and Methods). Here, we focused primarily on the 3-day-old adult dataset from Özel et al. (2020) (7544 cells) integrated with the 96 hours after puparium formation (APF) dataset from Kurmangaliyev et al. (2020) (766 cells); hereafter referred to as the young adult dataset (Figure 3 and Figure 3- supplementary figure S1C,D).

On Uniform Manifold Approximation and Projection (UMAP) visualisations, we noticed that many clusters were connected by streams of cells, which expressed *Resistant to dieldrin (Rdl)*, *Frequenin 1 (Frq1)*, and *Nckx30C* (Figure 3- supplementary figure S2A, top). These streams also co-expressed *embryonic lethal abnormal vision (elav)* and *found in neurons (fne)*, whose expression is known to be enriched pan-neuronally (Figure 3- supplementary figure S2A, bottom). Indeed, on UMAP visualisations *Rdl*, *Frq1* and *Nckx30C* were expressed pan-neuronally (Figure 3- supplementary figure S2B). We also detected *elav*, *fne*, *Rdl*, *Frq1*, and *Nckx30C* co-expressed in a subset of the

embryonic dataset (Figure 3- supplementary figure S2C,D). These data suggested that the *Rdl*, *Frq1* and *Nckx30C* expressing glial cells could represent neuronal contamination. Therefore, we used *in situ* hybridization chain reaction (HCR) and MCFO clonal analyses to assess the expression of these genes in adult optic lobes and newly hatched larval VNCs, respectively, but failed to detect any expression in glial cells (Figure 3- supplementary figure S3A-D). As glia interact closely with neurons throughout life, we hypothesised that the cells in our datasets that co-express *Rdl*, *Frq1* and *Nckx30C* represented either glial cells contaminated by neuronal transcripts or neuronal cells contaminated by glial transcripts. Therefore, to circumvent potential clustering artefacts, we removed cells expressing high levels of *Rdl*, *Frq1* and *Nckx30C* (see Materials and Methods; Figure 3- supplementary figure S3E-H,J-N). In addition, we noticed that a few cells expressed high levels of *Hemolectin (Hml)*, a hemocyte-specific marker (Goto et al., 2003), which likely indicated contamination from a few stray hemocytes; therefore, we eliminated these cells also (see Materials and Methods). Lastly, others have reported that glial clustering is sensitive to batch effects (Kurmangaliyev et al., 2020; Özel et al., 2021; Simon and Konstantinides, 2021), and to further minimise these, we eliminated clusters to which the Kurmangaliyev dataset contributed fewer than 1% of the total number of cells in the cluster (Figure 3- supplementary figure S3I). Following this elimination and reclustering (see Materials and Methods) our datasets clustered into 11 embryonic glial cell clusters and 15 adult optic lobe glial clusters (Figure 3, Figure 3- supplementary figure S3N and Figure 5- supplementary figure S1A).

### **Annotating embryonic glial clusters by validating marker gene expression in vivo**

Based on known marker genes, we were able to make predictions about the identity of most of the embryonic clusters (Figure 4A,B). For example, cells in cluster 1 strongly expressed the gene *wrapper*, which is a known cell type-specific marker of cortex glia (Coutinho-Budd et al., 2017). To validate the identity of each embryonic glial cluster, we acquired Gal4 lines for marker genes that were significantly enriched in one or more clusters (Figure 4A,B, see Materials and Methods for complete list) and used these lines to generate MCFO clones (Figure 4C-H and Figure 4- supplementary figures S1-3). Embryos were heatshocked between 6-10h after egg laying (prior to gliogenesis (Hartenstein et al., 1998)), and larvae were dissected at 0 h after larval hatching. These MCFO analyses revealed near perfect specificity for the predicted glial cell type (Figure 4B and Figure 4- supplementary figures S1-3). Indeed, by morphology and marker gene expression, 100% of *CG6126-Gal4* MCFO clones were perineurial glia, 100% of *moody-Gal4* MCFO clones were subperineurial glia,  $98 \pm 1$  SEM% of *Eaat2-Gal4* MCFO clones were ensheathing glia,  $96 \pm 1.3$  SEM% of *R54H02(wrapper fragment)-Gal4* MCFO clones were cortex glia, and  $98 \pm 1.5$  SEM% of *alrm-Gal4*

MCFO clones were astrocytes, consistent with their expression in the scRNA-seq data (Figure 4B and Figure 4- supplementary figures S1E,S2D,S3E). Importantly, drivers inserted in genes that showed expression across multiple clusters always produced MCFO clones with morphologies and markers that matched the predicted cluster identities. In other words, a gene that showed expression in both the predicted astrocyte and ensheathing glial clusters produced both astrocyte and ensheathing glia clones (Figure 4- supplementary figures S1-3). In this way we annotated 6 of the 11 clusters as apical perineurial glia, MAP glia, subperineurial glia, cortex glia, ensheathing glia and astrocytes and uncovered novel marker genes glial classes (and subtypes ;summarised in Figure 4B). *Lobe (L)*, a known marker of peripheral nervous system glia (Lassetter et al., 2021), was expressed by three of the remaining unannotated clusters (clusters #0, #6 and #8). We therefore annotated these clusters as peripheral nervous system glia (PNSg\_1, 2 and 3) but did not validate markers for these *in vivo*.

#### Perineurial glia morphotypes were transcriptionally distinct

Our previous clonal analysis of perineurial glial morphologies unveiled two perineurial glia morphotypes: apical perineurial glia and MAP glia (Figure 1C-D). Validating cluster marker expression *in vivo* revealed that apical perineurial and MAP glia were transcriptionally distinct, with cluster #4 corresponding to apical perineurial glia and cluster #10 corresponding to MAP glia. Clusters #4 and #10 were located adjacent to each other on the UMAP. *PRL-1* and *pippin* were enriched in cluster #4 and Gal4 drivers for these markers labelled clones with apical perineurial glial morphology only (Figure 4B and Figure 4- supplementary figure S3B,D,F). By contrast, cluster #10 expressed high levels of *CG6126* and *CG5080*, but low expression of *PRL-1* and *pippin* (Figure 4B), and *CG6126-Gal4* and *CG5080-Gal4* MCFO brains nearly always contained clones with MAP glia morphology (Figure 4C,D and Figure 4- supplementary figure S3A,F). Thus, the two perineurial glia morphotypes are transcriptionally distinct.

#### Embryonic astrocyte morphotypes were transcriptionally homogeneous

Our prior clonal analyses revealed two morphotypes within astrocytes: type 1 and type 2 (Figure 1A,H, and Figure 4- supplementary figures S1, S3). Astrocytes (both type 1 and 2) were distinguished by high expression of the gene *astrocytic leucine-rich repeat molecule (alrm)* (Figure 1H, Figure 4B) (Doherty et al., 2009). Interestingly, while our annotations revealed separate transcriptional clusters corresponding to MAP glia and apical perineurial glia (Figure 4A-D and Figure 4- supplementary figure S3), we observed just one transcriptional cluster for astrocytes based on strong expression of *alrm* (cluster #3). We questioned whether any of the markers enriched in our astrocyte cluster might distinguish type 1 from type 2 astrocytes. To this end, we generated MCFO

clones under the control of enhancers for genes expressed in the astrocyte cluster. All drivers gave rise to clones containing both type 1 and type 2 astrocytes at the expected proportions based on our *alrm* MCFO study (~62% type 1 and ~38% type 2), with the exception of Tet1, which gave a slightly higher proportion of type 2: type 1 astrocytes ( $p < .02$ , Chi-squared test), but still contained both clones (Figure 4A,B,H and Figure 4- supplementary figure S1). Thus, although distinct perineurial glia morphotypes corresponded to distinct transcriptional signatures, the same was not true for astrocyte morphotypes, with the caveat that scRNA-seq may fail to detect genes that are expressed at low levels.

Overall, these data suggest either that morphological diversity cannot be equated with transcriptional diversity, or that morphological diversity does not correlate with transcriptional diversity for specific glial classes only (*e.g.* astrocytes). As the developing *Drosophila* VNC contains a single, simple, neuropil, which may not accurately represent the diversity of more complex brain regions, we next turned to the more complex adult *Drosophila* optic lobe to assess how accurately cellular identity can be gauged by glial morphology.

## **Annotating young adult optic lobe glial clusters**

### *Comparisons to glial cell-type specific bulk RNA sequencing datasets*

To annotate adult optic lobe glia, we first compared glial cell-type specific transcriptomes (obtained from bulk-RNA sequencing of FACS-purified glial-types), which were published for the proximal satellite, epithelial and marginal glia (Davis et al., 2020), to the integrated young adult optic lobe scRNA-seq dataset. This approach matched the proximal satellite glia with cluster #14 (Pearson correlation = 0.243; Figure 5- supplementary figure S1A,C), however, both the epithelial and marginal glia showed the highest Pearson correlation with cluster #9 (0.277 and 0.3, respectively; Figure 5- supplementary figure S1A,D,E), a small cluster made up of only 82 cells. Since the clustering algorithm we used has a known tendency to group together rare cell types while splitting apart abundant cell-types artificially, we hypothesized that clusters containing few cells may contain more than one rare cell-type (Lancichinetti and Fortunato, 2011; Simon and Konstantinides, 2021). To determine if cluster #9 was comprised of a mixture of cells belonging to epithelial and marginal glial cell types that were artificially merged because of their rarity, we analysed cluster #9 in isolation and found that it could be divided into two distinct subclusters (Figure 5- supplementary figure S1F). We identified 22 genes that were differentially expressed (by at least 4-fold) between the two subclusters (Figure 5- supplementary Table S1). We found that marginal- and epithelial-specific marker genes, identified from the FACS-purified transcriptomes, segregated perfectly between the two subclusters (*e.g.* *GstT4* for marginal glia and *CG43795* for epithelial glia; Figure 5- supplementary

figure S1G,H). Indeed, when we plotted the expression of these marker genes on the original UMAP, we observed a clear spatial segregation among the cells of cluster #9, supporting the hypothesis that cluster #9 contained a heterogeneous cell population made up of both epithelial and marginal glial cells (Figure 5- supplementary figure S1I,J). Therefore, we used the subclusters to manually divide cluster #9 into two clusters (renamed cluster #9 and cluster #16), with (new) cluster #9 likely corresponding to the epithelial glia and cluster #16 likely corresponding to the marginal glia (Figure 5- supplementary figure S1K).

To test for heterogeneity in other clusters, we subclustered each in isolation and examined the differential gene expression between subclusters. To ensure that any subclusters uncovered in this manner represented real cellular heterogeneity rather than artificial differences due to over-clustering, we examined the number of genes expressed differentially between them (see Materials and Methods and Figure 5- supplementary Table S1). As with cluster #9, cluster #8 could also be divided into two subclusters, which segregated on the main UMAP. Therefore, we manually divided it (renamed cluster #8 and cluster #15) (Figure 5- supplementary figure S1L-Q). All other subclusters were deemed to be products of over-clustering artefacts, as few genes were expressed differentially between them (Figure 5- supplementary Table S1). Clusters #11, #12, #14, #15 and #16 contained fewer than 3 cells belonging to either the Özel or Kurmangaliyev datasets, rendering integration, and therefore subclustering analysis, impossible.

#### Validating marker gene expression *in vivo*

Next, we identified marker genes enriched in each cluster that would enable us to annotate all the clusters exhaustively (see Materials and Methods and Figure 5B). We validated the expression of 29 marker genes *in vivo* using available enhancer trap lines, antibodies, and by *in situ* hybridization chain reaction (HCR) (Figure 5C-H and Figure 5- supplementary figure S1-4). Since whole cell morphologies were not always visible when transcripts were visualized by HCR, we validated marker gene expression in specific glial-types by coexpression of the probe with glial-type Gal4 lines driving GFP (Figure 2- supplementary figure S1). In this way, we annotated all 17 clusters with 13 unique glial cell identities — fenestrated glia (lamina-specific perineurial), pseudocartridge glia (lamina-specific subperineurial), chalice glia (lamina-specific perineurial), distal satellite glia (lamina-specific cortex), proximal satellite glia (lamina-specific cortex), epithelial glia (lamina-specific astrocyte), marginal glia (lamina-specific ensheathing), chiasm glia (tract ensheathing), and medulla, lobula and lobula plate perineurial, subperineurial, cortex, ensheathing and astrocyte glia — with some glial identities mapping to multiple clusters (Figures 5C-H, Figure 5- supplementary figures S2-

4). Hereon, non-lamina glial classes are referred to as general perineurial, general subperineurial, general cortex, general ensheathing and general astrocyte glia.

We confirmed that clusters #9, #16 and #14 corresponded to epithelial, marginal, and proximal satellite glia, respectively, consistent with our previous comparisons to the glial cell-type specific transcriptomes (Figure 5B-H, Figure 6B and Figure 5- supplementary figure S3J and S4G,H,K). Carpet glia did not appear to be represented as a unique cluster, indicating that either they are transcriptionally indistinguishable from another type of surface glia or that they were not sampled in these datasets. The latter is more likely since only two carpet glia are present in each optic lobe and they can be uniquely labelled with their own driver lines (Ho et al., 2019), suggesting that they are a distinct cell type. As well, inner and outer chiasm glia could not be resolved into distinct clusters though unique driver lines do distinguish between them (Edwards et al., 2012). Instead, both mapped to cluster #10. Given that these are also rare cells, it is possible that cluster #10 contains a heterogeneous population, but that insufficient cells were sampled to resolve them in the present dataset. Thus, our annotations revealed that morphotypes associated with the lamina neuropil across all glial classes were transcriptionally distinct.

#### **General optic lobe glia do not subcluster by neuropil location**

While astrocytes can be categorised into eight distinct morphologies distributed across and within neuropils (including epithelial glia of the lamina) (Figure 2A, Q-W), we only identified three transcriptional clusters of putative astrocytes. We annotated cluster #9 as the epithelial glia (astrocytes of the lamina), whereas clusters #0 and #2 co-expressed well-known astrocyte markers including *Glutamine synthetase 2 (Gs2)*, *ebony (e)*, *nazgul (naz)*, *alrm*, and *Eaat1* (and did not express *Eaat2*, a known ensheathing glia marker; Figure 6- supplementary S1). We wondered whether Clusters #0 and #2, which were connected to each other on the UMAP visualization, corresponded to different morphological subtypes of astrocytes or to astrocytes of different neuropils or neuropil regions. However, most differentially expressed marker genes showed enriched expression in cluster #0 compared to cluster #2; e.g. *heartless (htl)*, which encodes an Fibroblast Growth Factor receptor and *myoblast city (mbc)* were expressed in cluster #0 only. We could not find unique marker genes for cluster #2 (Figure 6A,C). Therefore, we first examined the distribution of astrocytes across and within neuropils (excluding the lamina) using a pan-astrocyte-specific Gal4 to drive GFP expression (*R86E01>GFP*). Since *htl* and *mbc* were expressed only in cluster #0 and not cluster #2, we then compared the distribution of GFP-positive astrocytes by region (as indicated in Figure 6G) to the distribution of *htl* expressing astrocytes. Surprisingly, although *htl* and *mbc* were expressed only in one of the two astrocyte clusters, we detected their expression in 92.4% and 93.6% of all astrocytes, respectively, and there was no bias in their regional distribution (Figure 6A-D,G). The same was true

for *wunen 2* (*wun 2*), a marker expressed across both clusters #0 and #2 (Figure 6E,F,G). Therefore, both clusters mapped indistinguishably to general astrocytes, with no apparent correspondence to neuropil or morphology. Similar to clusters #0 and #2, when we validated marker gene expression *in vivo*, we were also unable to distinguish between clusters #3, #5 and #7, which all appeared to correspond to general ensheathing glia (*i.e.* ensheathing glia of the medulla, lobula and lobula plate; Figure 5- supplementary figure S3G-J). Likewise, clusters #11 and #13 both mapped to general cortex glia (*i.e.* cortex glia in the optic lobe excluding the lamina; Figure 5- supplementary figure S2B-D). Thus, transcriptional heterogeneity of the general optic lobe glia is not regionally defined.

### **Transcriptional diversity in the general optic lobe glia reflects cellular state and not cellular identity**

What then is the distinction between these clusters? Across model systems, glia appear to be more susceptible to stress than neurons during tissue dissociation (Kurmangaliyev et al., 2020; Marsh et al., 2022; Özel et al., 2021; Simon and Konstantinides, 2021). Indeed, compared with neuronal clusters, glial clusters within the Özel and Kurmangaliyev optic lobe datasets were reported to be enriched for cells with low total gene counts per cell, enriched in mitochondrial transcripts, features of low-quality transcriptomes (Kurmangaliyev et al., 2020; Özel et al., 2021; Simon and Konstantinides, 2021). While standard cut-offs (see Materials and Methods) for total and mitochondrial gene counts were used to filter out low-quality transcriptomes, we speculated that some of the glial clusters which mapped to the same cell-type (hereafter referred to as ‘cluster multiplets’) likely represented the same cell-type split by cell state (*e.g.* based on transcriptome quality or cellular stress). Therefore, we examined the total number of genes, the total number of reads and the proportion of mitochondrial genes relative to the total number of genes for each cluster within a multiplet (Figure 6- supplementary S2A-C). Although ensheathing glial clusters (#3, #5 and #7) and cortex glial clusters (#11 and #13) appeared to separate by transcriptome quality, we found no clear indication that general astrocyte clusters (#0 and #2) differed in this way (Figure 6- supplementary S2A-C). Therefore, we performed Gene Ontology (GO) enrichment analysis on the genes differentially expressed within the general astrocyte clusters with a 1.2-fold cut-off. Interestingly, this revealed that a wide range of GO terms (from signal transduction and morphogenesis to growth and taxis) were enriched for cluster #0, whereas GO terms associated with mitochondrial regulation, autophagy and metabolic processes were enriched for cluster #2 (Figure 6- supplementary S2D). These data suggested that cells of cluster #2 (*astrocyte\_2*) are unlikely to be a distinct cell type from those of cluster #0 (*astrocyte\_1*), but instead may be cells in distinct metabolic states. Altogether these data suggest that general astrocyte, ensheathing and cortex clusters may

be segregating based on transcriptome quality and/or cellular state, possibly driven by tissue dissociation. Furthermore, our data indicate that clusters #0 (astrocyte\_1), #3 (ensheathing\_1) and #11 (cortex\_1) likely correspond to a more homeostatic state of general astrocyte, ensheathing and cortex glia, respectively. We hypothesize that the generation of cluster multiplets occurred in the adult optic lobes due to the requirement to dissect these tissues prior to dissociation, resulting in greater tissue stress compared to our whole embryo dissociations.

Since our data indicated that cluster #0 (astrocyte\_1) most likely corresponded to homeostatic astrocytes of the medulla, lobula, and lobula plate, we subclustered it to further probe for any potential heterogeneity (see Materials and Methods and Figure 7A). Although we obtained three subclusters in this way, they differed only subtly from each other. We could identify only one marker gene (*Actin 79B*; *Act79B*) that was differentially expressed by at least 4-fold among the three subclusters (Figure 5- supplementary Table S1 and Figure 7B). Specifically, subclusters #0 and #2 showed enriched expression of *Act79B* relative to subcluster #1 (Figure 7B). Although 96% of the cells in cluster #0 (astrocyte\_1; homeostatic general astrocytes) expressed *Act79B* according to the scRNA-seq data, *in vivo* it was expressed very sparsely, in only 10.9% of medulla, lobula and lobula plate astrocytes (Figure 7C,D). These cells were found more frequently in the proximal medulla, the lobula, and lobula plate (Figure 7C,D). *Act79B* encodes what is thought to be a muscle-specific isoform of Actin (Dohn and Cripps, 2018; Ohshima et al., 1997) and therefore is unlikely to be a cell-fate determinant; we speculate instead that *Act79B* may be expressed by cells in a particular state of cytoskeletal remodelling (*e.g.* during process extension or growth). The apparent mismatch between the proportion of *Act79B*-expressing general astrocytes in scRNA-seq and *in vivo* may suggest that tissue dissociation pushes cells towards a state where *Act79B* is upregulated, but that this state is relatively rare under homeostatic conditions (*i.e.* *Act79B* may label a transient cell-state under homeostatic conditions) (Figure 7C,D). In sum, the unique and stereotyped morphologies of astrocytes of the medulla, lobula, and lobula plate cannot be assigned to unique transcriptional signatures and therefore likely represent morphotypes and not distinct subtypes of astrocytes. Furthermore, any hidden heterogeneity that we have been able to uncover within general astrocytes appears to correspond to a cell-state rather than cell-type or identity.

### **Immune response-related genes are enriched in lamina glia**

Lamina glia are the main source of transcriptional diversity in the optic lobes, with more unique cell types associated with the lamina than all other neuropils combined (Figure 8A). Indeed, in addition to its own unique counterparts for the main glial classes, the lamina contains multiple perineurial (fenestrated and chalice), subperineurial (pseudocartridge and carpet), and cortex (distal



and proximal satellite) glial subtypes. To investigate lamina glia specialization further, we performed GO enrichment analysis for biological processes on pooled lamina glia and pooled general optic lobe glia (summarised in Figure 8B and Materials and Methods). These comparisons revealed that compared to general glia, lamina glia are enriched for GO terms associated with immune-responses and cell junctions (Figure 8B). By contrast, general glia were enriched for terms associated with metabolite transport, intercellular signalling, and migration relative to lamina glia (Figure 8B). Thus, lamina glia appear to be specialized to perform immune-related functions relative to their general glial counterparts.

### **Motor and sensory-associated glia are transcriptionally similar**

Having shown that, apart from the lamina, optic lobe glia within each class are transcriptionally similar irrespective of morphology (*e.g.* all astrocyte morphotypes are transcriptionally similar, with the exception of lamina astrocytes), we sought to evaluate how different glia are between the young adult optic lobe and embryonic VNC, where developmental stage, circuits and afferent inputs are vastly different. To address this question, we integrated the embryonic VNC dataset with the optic lobe dataset, representing motor and sensory-associated glia, respectively. Note that our embryonic dataset, though generated from whole brains, will not have any optic lobe glia as they are not born until late larval and pupal development (Chotard and Salecker, 2007). Strikingly, we found that the embryonic clusters and their corresponding adult general glia clusters (*i.e.*, not the lamina clusters) converged on the UMAP visualization (Figure 9A-C). Indeed, several of our validated marker genes were found in both embryonic VNC glia and their counterparts in the adult optic lobe (summarised in Figure 9D). Interestingly, there was no overlap with lamina glia clusters, except for the embryonic MAP glia and the chalice glia, suggesting that they may be functionally analogous (Figure 9B,C).

Altogether, our analysis uncovered a surprising transcriptional similarity between glia from different circuit types, brain regions, and time points in development. This suggests that, within each general class (astrocyte, cortex, ensheathing, etc.), glia likely fulfil similar functions from circuit to circuit and across neuropils.

### **Discussion**

We generated, validated, and annotated the first single cell transcriptional atlas of *Drosophila* glia spanning embryo to adult. In validating our dataset, we identified many new marker genes for known glial cell types and identified a new glial cell type: MAP glia. Overall, our data indicate that for glia, morphological diversity is not sufficient to define a transcriptionally distinct cell

type. Indeed, we see transcriptional similarity within glial classes (*i.e.* optic lobe *versus* VNC astrocytes), despite changes in circuit location and developmental stage. Our data instead suggests that transcriptional diversity is a more reliable metric of cell identity and can be used to identify new cellular functions (*e.g.* immune functions of the lamina). We hope that this atlas will not only serve as a community resource but will facilitate many functional studies to unveil how distinct glial cell populations coordinate the development and function of neural circuits.

#### *Glial morphotypes may not all be transcriptionally distinct*

Modern definitions of neuronal identity now include electrophysiological properties, neurotransmitter identity and connectivity in addition to more classical features such as position and morphology (Kepecs and Fishell, 2014). In many instances, morphology remains a reliable indicator of neuronal cell identity (Cadwell et al., 2016; Konstantinides et al., 2018; Kurmangaliyev et al., 2020; Özel et al., 2021), with few exceptions (Gouwens et al., 2020, 2019; Que et al., 2021). While glial classes exhibit morphological and transcriptional diversity within and across brain regions (Batiuk et al., 2020; Bayraktar et al., 2020; Grabert et al., 2016; Marques et al., 2018; Spitzer et al., 2019), correlations between their morphological diversity and transcriptional diversity have not been explored systematically. Here, we took advantage of the relatively simple nervous system of *Drosophila* to investigate how glial morphologies correlate with transcriptional profiles.

We hypothesised that if cell morphology is indicative of cell function, glial cells that show several stereotyped morphologies (morphotypes) should exist as functionally distinct subtypes with corresponding transcriptional profiles. Surprisingly, we found that outside of broad glial classes, glial morphology was not a strong predictor of transcriptional identity. In the embryonic VNC and the adult optic lobe, astrocytes exist as two and eight morphotypes, respectively. While astrocytes of the lamina were transcriptionally distinct, we identified only one transcriptional cluster of true, homeostatic astrocytes that corresponded to all remaining astrocyte morphotypes at both developmental stages and brain regions. Indeed, the glial diversity we defined based on scRNA-seq transcriptional profiles matches remarkably well with glial diversity described previously with glial-specific drivers from the *Janelia GAL4* collection (Kremer et al., 2017; Pfeiffer et al., 2008). These driver lines also did not distinguish between cortex and ensheathing morphotypes of medulla, lobula and lobula plate neuropils (Kremer et al., 2017).

We observed a striking convergence in the transcriptional profiles of the embryonic and adult glial classes. When integrated, embryonic and adult glia co-clustered by class, despite the difference in developmental stage and origin. This result was also unexpected, as the embryonic dataset was enriched for glia within a sensorimotor circuit (Mark et al., 2021), and the adult dataset

was specific to the visual system. Thus, at the broad transcriptional level, glial classes do not appear specialised according to the circuit types they associate with.

It is possible that distinct morphotypes are functionally divergent, but that the genes that confer this diversity are lowly expressed or regulated post-transcriptionally. It is also possible that functional specialization may occur locally in micro-domains of the same cell. For example, astrocytes are intimately associated with neuronal synapses. At the synapse, astrocytes regulate synapse strength and turnover of local neurotransmitters. As a single astrocyte supports many distinct types of synapses simultaneously, each requiring different molecular machinery (Durkee and Araque, 2019), astrocytes must express a wide variety of channels and receptors (resulting in transcriptional homogeneity). Functional diversity could therefore be conferred by local synaptic activity. In other words, a single astrocyte may have functionally distinct microdomains dictated by the synapses it supports. Indeed, recent studies show that synapse activity regulates positioning of neurotransmitter receptors in astrocyte processes (Ciappelloni et al., 2017; Murphy-Royal et al., 2015; Muthukumar et al., 2014). Functional studies, including *in vivo* Calcium, Glutamate, or GABA imaging will help to resolve glial functional specialization both within and across cells.

A major anatomical difference between *Drosophila* and mammals is the size of glial domains relative to the size of the brain. Although only 10-15% of the *Drosophila* brain is made up of glia, astrocytes tile the entire CNS. For example, six individual astrocytes are sufficient to tile a single hemisegment of the larval VNC (Peco et al., 2016). In contrast, thousands of astrocytes are required to tile an analogous section of the mouse spinal cord (Sun et al., 2017). As mammalian astrocytes proportionally tile a much smaller region of the nervous system, it is conceivable that a single mammalian astrocyte can interact with one circuit type. In contrast, *Drosophila* astrocytes frequently span multiple circuits, which may require more functional flexibility. Thus, it is possible that further exploration of astrocyte diversity in vertebrates will identify unique transcriptional programs that specify morphologically distinct astrocytes with regionalized identities and functions. In sum, our work highlights the necessity for a systematic multimodal approach to characterising glial diversity in other systems (Khakh and Deneen, 2019; Westergard and Rothstein, 2020).

#### *Specialisation of the Drosophila lamina glia*

Transcriptomic studies in mammals have uncovered regional differences in astrocyte transcriptional profiles (*e.g.* between and within the cortex and hippocampus) (Batiuk et al., 2020; Bayraktar et al., 2020). In our optic lobe data, regional information accounted for much of the transcriptomic heterogeneity in the dataset, however, the major divide was determined by glial association with lamina *versus* non-lamina tissues. In other optic lobe regions (medulla, lobula and

lobula plate neuropils), we did not observe within-class transcriptional differences, despite the presence of seven morphotypes across three distinct neuropils. This is particularly surprising since others have speculated that circuit complexity (stemming from neuronal diversity) may drive glial specialization (Durkee and Araque, 2019; Khakh and Sofroniew, 2015), however, the lamina is the simplest of all neuropils, while the medulla is the most complex (Fischbach and Dittrich, 1989). Thus, at least for the optic lobes, region-specific neuronal diversity does not appear to be a predictor of glial diversity.

Our data revealed an upregulation of GO terms related to immune functions in lamina glia when compared to other optic lobe glia (Figure 8B). The lamina is the first neuropil to receive input from photoreceptor sensory neurons and is, therefore, the neuropil most exposed to the external world (Apitz and Salecker, 2014; Fischbach and Dittrich, 1989) and, thus, may be subject to more pathogenic insults compared to other optic lobe neuropils. This finding opens up the intriguing hypothesis that glia that interface with the environment may be specialised to manage environmental insults (*e.g.* heat, cold, lesions). In jawed vertebrates, Schwann cells are the most abundant peripheral nervous system cell type, primarily known for their role in myelination of peripheral axons (Durkee and Araque, 2019; Jessen et al., 2015; Wilson et al., 2021). Schwann cells can also be found at nerve terminals, as well as in the skin (Abdo et al., 2019; Barik et al., 2016). Recently, a specialised population of cutaneous Schwann cells was identified which sense noxious stimuli and initiate pain sensation (Parfejevs et al., 2018). Furthermore, Schwann cells can migrate away from peripheral nerves to aid in cutaneous wound healing following injury, which is accompanied by an upregulation of genes related to the innate immune response (Abdo et al., 2019). Defining the extent to which other glial cell populations at environmental boundaries adopt immune-related roles will broaden our understanding of the functional properties of glia not only for nervous system function, but organismal health.

Furthermore, we found that in *Drosophila* glia, within-class differences in morphology usually do not correspond to distinct transcriptional subtypes. Instead, our data suggest that glial morphology is likely to be set by the local environment (*e.g.* underlying circuit structure, or influence of external signals and forces) and thus represent a cellular state rather than an underlying transcription-driven identity. In the future, one could leverage genetic manipulations that alter circuit structure (Erclik et al., 2017; Mark et al., 2021) and assess the consequence on glial cell morphology.

## Materials and Methods

### Drosophila stocks and maintenance:

*Drosophila melanogaster* strains and crosses were reared on standard cornmeal medium and raised at 25°C unless stated otherwise. We used the following strains in this study (See source data Table 1 for more details):

*hs-FLPG5*; *10×UAS(FRT.stop)myr::smGdP-HA*, *10×UAS(FRT.stop)myr::smGdP-V5*,  
*10×UAS(FRT.stop)myr::smGdP-Flag* (hsMCFO; BDSC 64085), *pBPhsFlp2::PEST in attP3*;;  
*HA\_V5\_FLAG\_OLLAS* (BDSC: 64086), *CG6126-Gal4* (BDSC 67505), *CG5080-Gal4* (BDSC 83275), *PRL-1-Gal4* (BDSC 65566), *R54H02-Gal4* (BDSC 45784), *Eaat2-Gal4* (BDSC 78932), *alrm-Gal4* (BDSC 67031 and 67032), *Rdl-Gal4* (BDSC 65421 and 66509), *moody-Gal4* (BDSC 90883), *R25H07-Gal4* (BDSC 49145), *Tet-Gal4* (BDSC 19427), *pum-Gal4* (BDSC 63368), *w[\*] Tl{RFP[3xP3.cUa]=Tl}Tre1[attP]* (BDSC 84582), *ana-Gal4* (BDSC 86394), *CG9657-Gal4* (BDSC 78971), *CG9449-Gal4* (BDSC 91274), *pippin-Gal4* (BDSC 86401), *Itl-Gal4* (BDSC 76144), *PRL-Gal4* (BDSC 81151), *R85G01-Gal4* (BDSC: 40436), *R54C07-Gal4* (BDSC: 50472), *R10C12-Gal4* (BDSC: 47841), *R47G01-Gal4* (BDSC: 45768), *R50A12-Gal4* (BDSC: 47618), *R46H12-Gal4* (BDSC: 50285), *R53H12-Gal4* (BDSC: 50456), *R56F03-Gal4* (BDSC: 39157), *R35E04-Gal4* (BDSC: 48127), *R86E01-Gal4* (BDSC: 45914), *55B03-Gal4* (BDSC: 39101), *Repo-Gal4* (BDSC: 7415), *Mi{MIC}CG43795-GFP[MI03737]* (BDSC: 41395), *10XUAS-mCD8::GFP* (BDSC 32184 and 32186), *10XUAS-IVS-myr::GFP* (BDSC 32197) and *UAS-nls::GFP* (BDSC 4775 and 4776).

### Embryo collections:

For timed collections of embryonic and larval stages, crosses were reared in collection bottles fitted with 3% agarose apple caps coated with yeast paste. Embryos were then collected for 1.5-hour (h) windows and reared at 25°C until the desired developmental stage.

### Multi Color Flip-Out clonal analyses (See Source data Table 1 for list of genotypes):

Embryonic/larval ventral nerve cord: To generate multi-color flip-out (MCFO) clones, we crossed virgin females of the hsMCFO line to males of Gal4 lines that were known to be expressed (Coutinho-Budd and Freeman, 2013; Doherty et al., 2009; Peco et al., 2016; Schwabe et al., 2005) or found to be enriched in a given transcriptional cluster (see Source data Table 1 for full genotype list). Embryos were collected for 1.5 h, aged for 6 hours (embryonic stage 11/12, prior to gliogenesis (Hartenstein et al., 1998)), and then heatshocked at 37°C for 15 minutes to induce FLP expression. Embryos were then transferred to 4°C for 5 minutes to halt FLP expression and transferred to 25°C until hatching. At 25°C, hatching occurs at 21 h after egg laying (Crisp et al., 2008).

Adult optic lobe: For MCFO experiments of adult brains we utilised Janelia Gal4 driver lines with specific glial expression, as previously described (Kremer et al., 2017) (Figure 2- supplementary

figure S1). We crossed males of the glial-Gal4 lines with virgin females of a 3-tag (HA, V5 and FLAG) MCFO line, except the cortex and marginal Gal4s which we crossed with a 4-tag (HA, V5, FLAG and OLLAS) MCFO (Source data Table 1). We raised progeny at 18°C, and induced FLP expression in adult flies (0-5 days old) by heat-shocking at 37°C. Length of heat shocks varied depending on the Gal4 driver (Source data Table 1). After heat-shocking, flies were placed back at 18°C for at least 1 night, before being dissected and stained as detailed in our immunohistochemistry protocol.

### **Immunohistochemistry**

**Larval VNC:** For VNC studies, larvae were dissected at 0 h after larval hatching. We dissected larval brains in sterile-filtered, ice-cold 1× PBS. Brains were then mounted on 12 mm #1 thickness poly-d-lysine coated round coverslips (Neuvitro Corporation, GG-12-pdl) and fixed in fresh 4% paraformaldehyde (Electron Microscopy Sciences, 15710) in 1× PBS with 0.3% Triton detergent (0.3% PBST). We then washed the coverslips in 0.3% PBST to remove fixative and blocked overnight at 4°C in 0.3% PBST supplemented with 1% BSA (Fisher, BP1600-100), 1% normal donkey serum and 1% normal goat serum (Jackson ImmunoResearch Laboratories 017-000-121 and 005-000-121). Brains were then incubated in primary antibody overnight at 4 °C, washed overnight at 4 °C with 0.3% PBST, and then incubated in secondary antibodies overnight at 4 °C. We then removed the secondary antibodies, transferred the coverslips to 0.3% PBST overnight, and mounted in DPX. To mount in DPX, brains were dehydrated with an ethanol series: 30%, 50%, 70% and 90%, each for 5 min, then twice in 100% ethanol for 10 min each (Decon Labs, 2716GEA). Samples were then transferred to glass-bottomed depression slides with xylenes (Fisher Chemical, X5-1) for 2 × 10 min. Finally, samples were mounted onto slides containing DPX mountant (Millipore Sigma, 06552), and cured for 1–2 days before imaging.

**Adult optic lobe:** For immunocytochemistry experiments of the adult optic lobe, we dissected whole brains in 1X phosphate buffered saline (PBS), fixed in 4% paraformaldehyde for 30 minutes, then washed with 0.5% PBTx (1X PBS with 0.5% TritonX). We next incubated the samples with primary antibodies diluted in block (5% normal horse serum), for two nights. Samples were washed with 0.5% PBTx, incubated for a further two nights with secondary antibodies diluted in block, washed again and mounted in SlowFade (Life Technologies).

We used the following primary antibodies: Rabbit anti-Pros (1:1000)(Vaessin et al., 1991), Rat anti-HA (1:100; Millipore Sigma, 11867423001), Chicken anti-V5 (1:1000; Bethyl Laboratories, A190-118A), Mouse anti-Repo (1:50, DSHB 8D12), Mouse anti-Cherry (1:500; Clontech, 632543), Rabbit anti-Gat (1:4,000; a gift from M. Freeman)(Stork et al., 2014), rat Anti-FLAG (1:400, Novus NBP1-06712), rabbit Anti-HA-tag (1:400, Cell Signalling Technology, C29F4), rat anti-Elav (1:20, DSHB

7E8A10), mouse anti-V5-Tag:DyLight-550 mouse (1:400, Bio-Rad), chicken anti-GFP (1:400, EMD Millipore), rabbit anti-GFP (1:400, Thermo Fisher A6455), DyLight 405 conjugated Goat Anti-HRP (1:50, Jackson ImmunoResearch, 123-475-021) and mouse anti-FasIII (1:20, DSHB 7G10).

We used the following secondary antibodies at 1:400: Alexa Fluor Rhodamine Red-X Donkey-Anti Mouse (Jackson ImmunoResearch, 715-295-151), Alexa Fluor 488 Donkey anti-Rabbit (Jackson ImmunoResearch, 711-545-152), DyLight 405 Donkey-anti Rabbit 405 (Jackson ImmunoResearch, 711-475-152), Alexa Fluor 488 Donkey anti-Chicken (Jackson ImmunoResearch, 703-545-155), Alexa Fluor Rhodamine Red-X Donkey-Anti Rat (Jackson ImmunoResearch, 712-295-153), Alexa Fluor 647 Donkey anti-Mouse (Jackson ImmunoResearch, 715-605-151) and Alexa Fluor 647 donkey anti-rat (Jackson Immunolabs, 712-605-153).

### **Embryo dissociation for single cell RNA sequencing (scRNA-seq)**

We prepared cell dissociates from embryos at 17-18.5 h after egg laying (stage 17). We washed embryos in deionized water before surface sterilizing them in 30% bleach for 2 minutes. We then homogenized them in Chan-Gehring (C + G) medium by six to eight strokes of a loose-fitting dounce. We filtered the cell suspension through a 40 µm Nitex mesh, and pelleted cells in a clinical centrifuge at 4°C (setting 5, IEC). We washed the cell pellet twice by pouring off the supernatant and gently resuspending the pellet in fresh C + G, pelleting between each rinse as above. We determined the cell-survival proportion for each dissociate using the BioRad TC-20 trypan-blue assay. Samples that met a threshold of 80% viability were submitted for sequencing at a concentration of 1000 cells per microliter.

### **Single cell RNA sequencing of stage 17 embryos**

The University of Oregon Genomics and Cell Characterization core facility (<https://gc3f.uoregon.edu/>) prepared embryonic cell samples for scRNA-seq. We ran dissociated cells on a 10X Chromium platform using 10X NextGem v3.1 chemistry targeting 10,000 cells per sample. Following cDNA library preparation, we amplified the library with 15 cycles of PCR before sequencing on two separate Illumina Hi-seq lanes, providing two technical replicates. Following examination for batch effects between technical replicates (Source Data Figure 1), we merged the datasets using the CellRanger Aggregate function prior to quality control and downstream analysis. Reads were aligned to the Drosophila genome (BDGP6.22) and protein coding reads were counted.

### **Initial quality control and cell clustering of glia from embryonic scRNA-seq**

We analysed the resulting sequencing data with the 10X CellRanger pipeline, version 3.1.0 (Zheng et al., 2017), R version 3.6.3 and Seurat (Hao et al., 2021) version 3.1.2 using standard quality control, normalization, and analysis steps. We filtered cells by the percentage of mitochondrial genes

expressed (relative to the total number of genes expressed), indicating a high stress state. Only cells expressing <10% mitochondrial reads were retained for analysis. Additionally, cells containing reads for <50 and >3000 unique genes were filtered out of downstream analysis. For each gene, expression levels were normalized by total expression, multiplied by a scale factor (10,000) and log-transformed, and the top 3000 variable genes were identified for downstream Principal Component Analysis (PCA). Clustering was performed using 50 PCs [*FindClusters* resolution 1.0], resulting in a Seurat object containing 52,881 cells. To isolate neuronal and glial cell clusters from all somatic tissues, we visualized the expression of *elav*, *repo*, *Gat*, and *alrm* in UMAP space. We then selected embryonic clusters 18, 2, 0, 4, 24, 26, 22, 16, 13, 14, 11 and 27 to be subset for further analysis. The resulting subset of cells were re-clustered using the previous parameters, resulting in the stage 17 embryonic neurons + glia dataset (19,600 cells). To isolate embryonic glia from embryonic neurons, we again visualized the expression of *elav*, *repo*, *Gat*, and *alrm* in UMAP space. From this object, clusters 23, 26, 34, 38, 17, 41, 27, 32 and 19 were identified as glial/non-neuronal. The resulting dataset (3221 cells) was exported (.Rds) for subsequent analyses.

#### **Preliminary integration of published optic lobe glial single cell RNA sequencing datasets**

Two independent studies published scRNA-seq datasets of the optic lobes throughout pupal development with a focus on neuronal development and therefore did not analyse glial clusters (Kurmangaliyev et al., 2020; Özel et al., 2021). We took advantage of the glial cells within these datasets here. Özel et al. (2021) performed scRNA-seq on optic lobes at specific stages in triplicate, profiling a total of 275,000 cells, whereas Kurmangaliyev et al. (2020) used a novel strategy to perform multiplexed scRNA-seq of many developing brain samples in parallel and profiled 51,000 cells in total. The two datasets (hereafter referred to as the Özel and Kurmangaliyev datasets, respectively) thus varied dramatically in the number of cells they each profiled. Here we chose to focus specifically on optic lobe glia from developmental stages that most closely match the young adult, *i.e.* young adult dataset from Özel et al. (2021) and 96h APF dataset from Kurmangaliyev et al. (2020) We used R (version 4.1.0) and Seurat (version 4.0.3) (Hao et al., 2021) to analyse the optic lobe scRNA-seq datasets from Özel et al. (2021) (NCBI GEO accession GSE142787) and Kurmangaliyev et al. (2020) (NCBI GEO accession GSE156455). [] enclose the specific Seurat functions used.

We converted the Kurmangaliyev 10X Genomics data to an RDS file [*CreateSeuratObject*] and subsetted [*subset*] the cells belonging to the 96h APF timepoint (within metadata, under 'time'). Glial clusters were subsetted from both the 96h APF-Kurmangaliyev dataset (within metadata, under 'class') and adult-Özel dataset based on the original annotation; *i.e.* *repo* expression. Since the two datasets represent glia from the same structure and from very close developmental stages, we used



Seurat's Integration pipeline to find corresponding cells and batch correct the two datasets (Figure 3). We normalized each glial dataset [*NormalizeData*] and selected the 2000 most variable features [*FindVariableFeatures*]. We defined Anchors [*FindIntegrationAnchors*, *dims* = 1:30] and integrated the datasets [*IntegrateData*, *dims* = 1:30]. We then scaled the integrated dataset [*ScaleData*] and ran PCA [*RunPCA*, *npcs* = 30]. We checked elbow plots [*ElbowPlot*] to determine the number of dimensions to use in [*FindNeighbors*, *dims* = 1:16], followed by [*FindClusters*, *resolution* = 0.5]. We obtained 20 clusters and used a Uniform Manifold Approximation and Projection (UMAP) dimensionality reduction [*RunUMAP*, *reduction* = *pca*, *dims* = 1:20] to plot the cell clusters and visualise their distribution as a 2-dimensional representation [*DimPlot*] (Figure 3 and Figure 3-supplementary figure S2C,D).

### **Further clean-up of young adult optic lobe and embryonic VNC glial datasets**

#### Neuronal and hemocyte clean-up:

While analysing the adult optic lobe dataset we noticed that most glial clusters contained cells that formed streams that extended towards the center of the UMAP and that cells in these streams expressed high levels of *Rdl*, *Frq1*, *Nckx30C*, *elav* and *fne* whereas cells belonging to the main body of clusters did not express these genes (Figure 3- supplementary figure S2A). *elav* and *fne* are well-documented pan-neuronal marker genes. Indeed, we found that *Rdl*, *Frq1* and *Nckx30C* genes were also expressed pan-neuronally (Figure 3- supplementary figure S2B). Thus, we hypothesized that they likely represented contamination from neurons due to the close association of glia and neurons. We also observed *Rdl*, *Frq1*, *Nckx30C*, *elav* and *fne* co-expressing cells in the embryonic VNC glial dataset (mainly from cluster 4) and pan-neuronally (Figure 3- supplementary figure S2C,D). We validated that *Frq1* and *Nckx30C* are expressed neurons and not glia by HCR in the adult optic lobes (Figure 3- supplementary figure S3A-C), and similarly through MCFO clonal analyses in the embryo found that *Rdl* was exclusively expressed in neurons (Figure 3- supplementary figure S3D). We then examined the distribution of cells expressing different levels of *Rdl*, *Frq1* and *Nckx30C* in individual glial clusters and all neuronal clusters averaged [*RidgePlot*] (Figure 3- supplementary figure S3E,F), and used these distributions to choose a cut-off to eliminate *Rdl*, *Frq1* and *Nckx30C* expressing cells from the glial clusters [*subset*, *Rdl*/*Frq1*/*Nckx30C* ≤ 1] (5101 cells in total; Figure 3- supplementary figure S3G,H). To remove contaminated cells in the embryo, we used the same thresholds (Figure 3- supplementary figure S3J-N) as the adult dataset (346 cells in total). We also eliminated putative hemocytes from both the young adult optic lobe (3 cells) and embryonic VNC (10 cells) glial datasets by removing cells that expressed *Hml*, a hemocyte-specific marker [*subset*, *Hml* ≤ 0].

### **Re-clustering the embryonic VNC dataset**

Following the clean-up described above for the embryonic VNC glial dataset, we normalized the data [*NormalizeData*], selected the 2000 most variable features [*FindVariableFeatures*], scaled the data [*ScaleData*] and ran PCA [*RunPCA*, *npcs* = 30]. We examined elbow plots [*ElbowPlot*] to determine the number of dimensions to use in [*FindNeighbors*, *dims* = 1:16], followed by [*FindClusters*, *resolution* = 0.5]. We obtained 11 clusters and plotted them as a 2-dimensional representation ([*RunUMAP*, *reduction* = *pca*, *dims* = 1:20]; [*DimPlot*]; Figure 3; See also Figure 3- supplementary figure S3G,H).

### **Re-integrating the young adult optic lobe dataset and eliminating clusters originating from a single dataset**

Following the clean-up described above for the young adult optic lobe glial dataset we obtained a list of the cells remaining using [*WhichCells*] (all identities, by default *ident* argument) and isolated these cells from the original 96h APF – Kurmangaliyev and young adult – Özel datasets (using [*subset*], and lists of cells used as *cells* argument). We then integrated these as described previously; [*FindNeighbors*, *dims* = 1:19] and [*FindClusters*, *resolution* = 0.5] (Figure 3- supplementary figure S2I). We obtained 19 clusters. Since others have reported that glial clustering is sensitive to batch effects (Kurmangaliyev et al., 2020; Özel et al., 2021; Simon and Konstantinides, 2021), we eliminated clusters to which the Kurmangaliyev dataset contributed fewer than 1% of the total number of cells in the cluster (Figure 3- supplementary figure S3I; a total of 850 cells were eliminated) and reintegrated the remaining cells as described above (Figure 3). Following this, the young adult optic lobe glial dataset consisted of 15 clusters (Figure 3).

### **Comparing cell-type-specific bulk RNA sequencing to scRNA-seq**

Cell-type-specific transcriptomes, obtained by Tandem-affinity purification of intact nuclei sequencing, were published for the marginal glia, epithelial glia and the proximal satellite glia (Davis et al., 2020) (NCBI GEO accession #GSE116969). We simulated the FACS-sorted glial-type-specific transcriptomes as single-cell transcriptomes to enable us to compare these deep bulk RNA sequencing datasets with the shallower scRNA-seq dataset, as described in Konstantinides et al., 2018. Briefly, a random number of reads were assigned to each of 900 simulated cells, from a normal distribution with the same mean and standard deviation as the cells in the final Adult-96hAPF dataset. The probability of expression of each gene was obtained by dividing the number of transcripts per million (TPM) of each gene by the total, in each cell-type, and this probability was used to allocate the number of reads of each simulated cell. The simulated matrix of expression was transformed into a RDS object, normalised [*NormalizeData*] and average expression of each gene was calculated [*AverageExpression*]. We then examined the Pearson correlations between the

average expression of the simulated single-cell and the average expression of the scRNA-seq clusters to determine the best match.

#### **Sub-clustering individual glial clusters:**

To analyse individual young adult optic lobe glial clusters, we used [*WhichCells*] to obtain the list of cells belonging to a specific cluster and subsetted those cells from the original Kurmangaliyev and Özel datasets [*subset*]. We then integrated these as described above. The arguments *dims*, *k.score* and *k.filter* in [*FindIntegrationAnchors*], and *dims* and *k.weight* in [*IntegrateData*], were assigned a value of 1 unit lower than the smallest number of cells in either the Kurmangaliyev or Özel subsetted cells. Next, we used [*FindNeighbors*] and [*FindClusters*] (see Figure 5- supplementary Table S1 for specific dimensions and resolutions used).

#### **Adding subclusters to main young adult optic lobe glial dataset**

Figure 5- supplementary Table S1 summarizes the number of subclusters obtained following sub-clustering of individual glial clusters. To account for over-clustering artefacts, we examined the number of genes that were differentially expressed between subclusters. Only the subclusters of clusters 8 and 9 expressed greater than 20 genes differentially (4-fold change or higher), whereas all other subclusters expressed fewer than 15 genes differentially. Therefore, we proceeded to manually divide clusters 8 and 9 accordingly (Figure 5- supplementary figure S1F-Q). We obtained lists of cells belonging to each of these sub-clusters using [*WhichCells*] and used these lists to define new cell clusters in the full dataset, thus generating 17 clusters in total (Figure 5A).

#### **Finding markers for clusters in the embryonic VNC and young adult optic lobe glial datasets**

We identified marker genes expressed by each glial cluster using [*FindMarkers*]. To find genes with highly specific expression, we first focused on the top 30 differentially expressed transcripts. We then examined their expression within and across clusters [*FeaturePlot*] to choose transcripts that were expressed by most cells in a given cluster (See Figures 4B and 5B for a summary of the marker genes validated *in vivo*).

#### ***In vivo situ* Hybridisation chain reaction (HCR) probe design**

To assess the expression of marker genes *in vivo*, we designed hybridization chain reaction (HCR) probes against chosen marker genes (Figure 5B). We designed 6-21 antisense probe pairs against each target gene, tiled along the annotated transcripts but excluding regions of strong sequence similarity to other transcripts (See Supporting Information HCR Probe Sequences.xls), with the corresponding initiator sequences for amplifiers B3 and B5 (Choi et al., 2018). We purchased HCR probes as DNA oligos from Thermo Fisher (at 100  $\mu$ M in water and frozen).

### ***In situ* Hybridisation chain reaction (HCR)**

We dissected optic lobe – central brain complexes from adult flies (female and male) in 1X phosphate-buffered saline (PBS). We then fixed them in 4% formaldehyde for 35 min at room temperature. We then rinsed (3X) and washed (3X 30mins) them in PBSTx (1X PBS with 0.5% Triton X-100, Fisher BioReagents). Next, we transferred the optic lobe – central brain complexes to 1.5 mL Eppendorf tubes and followed the Multiplexed HCR RNA-FISH protocol (Detection and Amplification stages) for whole-mount fruit fly embryos, from Molecular Instruments ([molecularinstruments.com](http://molecularinstruments.com)), also described in Choi et al. (2018) with the following modifications: we used 2 pmol of stock probe set and 12 pmol of each hairpin. Before proceeding with the 30min washes with 5X sodium chloride sodium citrate (SSC) with 0.1% Tween 20 (SSCT), we incubated samples with in 5X SSCT (with DAPI) for 2h at room temperature. All HCR buffers and hairpins were purchased from Molecular Instruments. Samples were stored at 4°C and mounted in SlowFade™ Gold Antifade Mountant (Thermo Fisher) within 3 days of completing the protocol.

### **Microscopy and image processing**

*Larval VNC:* We used a Zeiss LSM700 confocal microscope with a 63X objective to image all samples with a step size of .38µm, and the following laser lines: 405, 488, 555, 647. Images were acquired using Zen Black. Samples were imaged to encompass the entire dorsal-ventral extent of the VNC.

*Young adult optic lobe:* We used a Zeiss LSM800 or LSM880 confocal microscope with 40X objectives to image all samples with a maximum step size of 1µm.

### **Quantifications and statistical analyses**

*Larval VNC:* In Bitplane Imaris (version 9.6.1), a 3D projection was created for each individual VNC. For quantification of *repo*<sup>+</sup> cells in the VNC versus brain lobes, we used the Imaris “Spots” function to automatically reconstruct and quantify the number of *repo*<sup>+</sup> nuclei (xy diameter set to 3µm, z spread set to 5 µm, manual thresholding). We quantified *repo*<sup>+</sup> cells in 7 independent VNC samples and 7 independent brain lobe samples at hatching (Genotype: *hsMCFO + fne-Gal4*). VNC enrichment was then determined via a one-way ANOVA in GraphPad Prism 9. For morphometric analyses, subtypes and morphotypes were quantified manually, blinded to genotype, and assessed statistically in Graphpad Prism 9 by Chi-squared statistical tests.

*Adult optic lobe astrocytes:* We used the following approach to quantify the proportion of total astrocytes expressing a particular marker gene and their positions within the optic lobe. In Fiji (ImageJ2 version 3.2.0) we chose 35 to 50 optical slices [*Make Substack*] from each Z-stack. We performed a standard background subtraction [*Subtract Background*] (default parameters). We then created an average intensity projection and measured the mean fluorescence intensity of the HCR probe channel to obtain a Normalisation value (see below). We then used Icy (version 2;

icy.bioimageanalysis.org) for further analysis. In Icy, we first defined neuropil regions (as in Figures 6 and 7 for astrocytes, we then used the *Spot Detector* plugin (spot scale of 13 or 25 pixels in size and 40 to 100 sensitivity) to identify glial nuclei marked by nuclear GFP (*R86E01-Gal4>nls::GFP*) within these neuropil regions. We manually removed nuclei from the central brain that were detected by this method to restrict our analysis to the medulla, lobula and lobula plate only. We then quantified the mean fluorescence intensity of mRNAs detected by HCR in the defined ROIs. We scaled these measures to the normalization value (defined above) and used a threshold of 2.25, above which cells were considered positive for expression of the specific transcript examined. We settled on this threshold empirically by analysing several samples for markers that these cells were known to express or not express. We then calculated the proportion of nuclei positive for a given transcript in each optic lobe (excluding the lamina) as well as the proportion of positive nuclei within different neuropil regions. We used GraphPad Prism 9 to analyse these data with Chi-squared statistical tests.

### Gene Ontology Enrichment Analyses

All gene ontology (GO) enrichment analyses were carried out in R studio (version 1.4.1717), using R (version 4.1.1). We identified differentially expressed genes in our cluster/s of interest using [*FindMarkers*] from Seurat (version 4.1.1) (Hao et al., 2021). For comparisons of one single cluster to another, markers were selected with a  $\log_2FC \geq 0.25$  (fold change of 1.2). When comparing larger groups of clusters (*i.e.* the pooled lamina glia clusters to the pooled general glia clusters) a more stringent threshold of 1  $\log_2FC$  (fold change of 2) was used to select differentially expressed genes. GO enrichment analysis for Biological Processes (BP) were carried out using [*enrichGO*] from clusterProfiler (version 4.2.2) (Hao et al., 2021). Within this function the adjusted p-values associated with the GO terms were calculated, using the Benjamini-Hochberg (BH) adjustment method for multiple comparisons. Only terms with adjusted p-value  $< 0.05$  were considered. We next used [*simplify*] from clusterProfiler (Yu et al., 2012), with a p-adjust threshold of 0.7, which acts to reduce the redundancy in the enriched GO terms. The top 20 GO terms for each group were selected based on their significance (adjusted p-value), and plotted as a heatmap using ggplot2 (version 3.3.5)(Wickham, 2016). A dendrogram of the enriched GO terms was built using the Ward D agglomerative method with [*hclust; dist*], based on their pairwise similarity calculated with the Wang method using [*pairwise\_termsim*] from the enrichplot package (version 1.14.2). This dendrogram was used to arrange and group the GO terms, enabling us to manually define superterms for the enrichment. For several poorly annotated GO terms we examined the annotated genes and manually renamed the GO terms (see R script available on our GitHub page for full details).

### **Data and software availability**

All raw and processed transcriptome data for the embryonic dataset are available from NCBI GEO (accession GSE208324). The scripts used to process the raw RNA-seq data and extract glial clusters from the embryonic dataset are available at [https://github.com/AustinSeroka/2022\\_stage17\\_glia](https://github.com/AustinSeroka/2022_stage17_glia). The cleaned-up and annotated embryonic glial dataset and the integrated cleaned-up and annotated young adult optic lobe glial dataset are included here as a supplementary files: “embryoS17glia.rds” and “adultOLglia.rds”, respectively. All other scripts described above are available at [https://github.com/VilFernandesLab/2022\\_DrosophilaGlialAtlas](https://github.com/VilFernandesLab/2022_DrosophilaGlialAtlas).

### **Funding**

SW was funded by a Wellcome Investigator Award (104682/Z/14/Z). SDA was funded by the National Institute of Health (K99NS121137). VMF was funded by a Wellcome Trust and the Royal Society Sir Henry Dale Research Fellowship (210472/Z/18/Z).

### **Acknowledgements**

We thank Gaynor Smith, Marc Amoyel, Kelly Monk, Nathan Woodling, Simon Sprecher, and Chris Doe for helpful comments and critiques of the manuscript. Stocks for this study were obtained from the Bloomington Drosophila Stock Center.

### **Author contributions**

I.L-B., S.D.A, and V.M.F conceived of the project. I.L-B. performed and analysed experiments related to Figures 2-9, and all associated supplementary figures. S.D.A performed and analysed experiments related to Figure 1, Figure 4 and all associated supplementary figures. M.C. performed and analysed experiments related to Figures 2, 8 and all associated supplementary figures. M.C. also generated the graphics used in Figures 1-2. A.S. analysed experiments related to Figure 4, as well as source data Figure 1, Figure 3-Figure S2, and Figure 3-Figure S3. C.T., G.P. and S.W. designed HCR probes and assisted in training I.L-B. and M.C. in HCR hybrid chain ISH. I.L-B., S.D.A., M.C., and V.M.F. wrote the paper and prepared the figures. All authors commented and approved of the manuscript.

## References

- Abdo H, Calvo-enrique L, Lopez JM, Song J, Zhang M, Usoskin D, Manira A El, Adameyko I, Hjerling-leffler J, Ernfors P. 2019. Specialized cutaneous Schwann cells initiate pain sensation. *Science (80- )* **365**:695–699.
- Allen NJ, Lyons DA. 2018. Glia as architects of central nervous system formation and function. *Science (80- )* **362**:181–185.
- Apitz H, Salecker I. 2014. A challenge of numbers and diversity: neurogenesis in the Drosophila optic lobe. *J Neurogenet* **28**:1–35. doi:10.3109/01677063.2014.922558
- Avalos CB, Maier GL, Bruggmann R, Sprecher SG. 2019. Single cell transcriptome atlas of the Drosophila larval brain. *Elife* **8**:e50354.
- Bakken TE, Velthoven CTJ Van, Menon V, Hodge RD, Yao Z, Nguyen TN, Graybuck LT, Horwitz GD, Bertagnolli D, Goldy J, Yanny AM, Garren E, Parry S, Casper T, Shehata SI, Barkan ER, Szafer A, Levi BP, Dee N, Smith KA, Sunkin SM, Bernard A, Phillips J, Hawrylycz MJ, Koch C, Murphy GJ, Lein E, Zeng H, Tasic B. 2021. Single-cell and single-nucleus RNA-seq uncovers shared and distinct axes of variation in dorsal LGN neurons in mice, non-human primates, and humans. *Elife* **10**:1-e64875.
- Barik XA, Li XL, Sathyamurthy XA, Xiong XW, Mei L. 2016. Schwann Cells in Neuromuscular Junction Formation and Maintenance. *J Neurosci* **36**:9770–9781. doi:10.1523/JNEUROSCI.0174-16.2016
- Batiuk MY, Martirosyan A, Wahis J, Vin F De, Marneffe C, Kusserow C, Koeppen J, Viana JF, Oliveira JF, Voet T, Ponting CP, Belgard TG, Holt MG. 2020. Identification of region-specific astrocyte subtypes at single cell resolution 1–15. doi:10.1038/s41467-019-14198-8
- Bayraktar OA, Bartels T, Holmqvist S, Kleshchevnikov V, Martirosyan A, Polioudakis D, Haim L Ben, Young AMH, Batiuk MY, Prakash K, Brown A, Roberts K, Paredes MF, Kawaguchi R, Stockley JH, Sabeur K, Chang SM, Huang E, Hutchinson P, Ullian EM, Hemberg M, Coppola G, Holt MG, Geschwind DH, Rowitch DH. 2020. Astrocyte layers in the mammalian cerebral cortex revealed by a single-cell in situ transcriptomic map. *Nat Neurosci* **23**. doi:10.1038/s41593-020-0602-1
- Bittern J, Pogodalla N, Ohm H, Schirmeier S, Klämbt C, Brüser L, Kottmeier R. 2021. Neuron – glia interaction in the Drosophila nervous system. *Dev Neurobiol* **81**:438–452. doi:10.1002/dneu.22737
- Cadwell CR, Palasantza A, Jiang X, Berens P, Deng Q, Yilmaz M, Reimer J, Shen S, Bethge M, Tolias KF, Sandberg R, Tolias AS. 2016. Electrophysiological , transcriptomic and morphologic profiling of single neurons using Patch-seq. *Nat Biotechnol* **34**:199–203. doi:10.1038/nbt.3445
- Chai H, Diaz-castro B, Shigetomi E, Whitelegge JP, Coppola G, Khakh BS. 2017. Neural Circuit-Specialized Astrocytes : Transcriptomic, Proteomic, Morphological, and Functional Evidence. *Neuron* **95**:531–549. doi:10.1016/j.neuron.2017.06.029
- Choi HMT, Schwarzkopf M, Fornace ME, Acharya A, Artavanis G, Stegmaier J, Cunha A, Pierce NA. 2018. Third-generation in situ hybridization chain reaction : multiplexed, quantitative, sensitive, versatile, robust. *Development* **145**:dev165753. doi:10.1242/dev.165753
- Chotard C, Salecker I. 2007. Glial cell development and function in the Drosophila visual system. *Neuron Glia Biol* **3**:17–25. doi:10.1017/S1740925X07000592
- Ciappelloni S, Murphy-Royal C, Dupuis JP, Oliet SHR, Groc L. 2017. Dynamics of surface neurotransmitter receptors and transporters in glial cells: Single molecule insights. *Cell Calcium* **67**:46–52. doi:https://doi.org/10.1016/j.ceca.2017.08.009
- Coutinho-Budd J, Freeman MR. 2013. Probing the enigma: Unraveling glial cell biology in invertebrates. *Curr Opin Neurobiol* **23**:1073–1079. doi:10.1016/j.conb.2013.07.002
- Coutinho-Budd JC, Sheehan AE, Freeman MR. 2017. The secreted neurotrophin Spätzle 3 promotes glial morphogenesis and supports neuronal survival and function. *Genes Dev* **31**:2023–2038. doi:10.1101/gad.305888.117.GENES
- Crisp S, Evers JF, Fiala A, Bate M. 2008. The development of motor coordination in Drosophilaembryos. *Development* **135**:3707–3717. doi:10.1242/dev.026773
- Davie K, Janssens J, Koldere D, Fiers M, Davie K, Janssens J, Koldere D, Waegeneer M De, Pech U.

2018. A Single-Cell Transcriptome Atlas of the Aging Resource A Single-Cell Transcriptome Atlas of the Aging Drosophila Brain. *Cell* **174**:982–998. doi:10.1016/j.cell.2018.05.057
- Davis FP, Nern A, Picard S, Reiser MB, Rubin GM, Eddy SR, Henry GL. 2020. A genetic, genomic, and computational resource for exploring neural circuit function. *Elife* **9**:e50901.
- Dimou L, Gallo V. 2015. NG2-Glia and Their Functions in the Central Nervous System. *Glia* **63**:1429–1451. doi:10.1002/glia.22859
- Doherty J, Logan MA, Taşdemir ÖE, Freeman MR. 2009. Ensheathing Glia Function as Phagocytes in the Adult Drosophila Brain. *J Neurosci* **29**:4768–4781. doi:10.1523/JNEUROSCI.5951-08.2009
- Dohn TE, Cripps RM. 2018. Absence of the Drosophila Jump Muscle Actin Act79B is Compensated by Up-regulation of Act88F. *Dev Dyn* **247**:642–649. doi:10.1002/dvdy.24616
- Durkee CA, Araque A. 2019. Diversity and Specificity of Astrocyte–neuron Communication. *Neuroscience* **396**:73–78. doi:https://doi.org/10.1016/j.neuroscience.2018.11.010
- Edwards TN, Meinertzhagen IA. 2010. The functional organisation of glia in the adult brain of Drosophila and other insects. *Prog Neurobiol* **90**:471–497. doi:10.1016/j.pneurobio.2010.01.001.The
- Edwards TN, Nuschke AC, Nern A, Meinertzhagen I a. 2012. Organization and metamorphosis of glia in the Drosophila visual system. *J Comp Neurol* **520**:2067–2085. doi:10.1002/cne.23071
- Erclik T, Li X, Courgeon M, Bertet C, Chen Z, Baumert R, Ng J, Koo C, Arain U, Behnia R, Del A, Rodriguez V, Senderowicz L, Negre N, Kevin P. 2017. Integration of temporal and spatial patterning generates neural diversity. *Nat Publ Gr* **541**:365–370. doi:10.1038/nature20794
- Escartin C, Galea E, Laktos A, O’Callaghan JP, Carmignoto G, Agarwal A, Allen NJ, Araque A, Barbeito L, Quintana FJ, Ransohoff RM, Riquelme-perez M, Robel S. 2021. Reactive astrocyte nomenclature, definitions, and future directions. *Nat Neurosci* **24**:312–325. doi:10.1038/s41593-020-00783-4
- Fischbach KF, Dittrich APM. 1989. The optic lobe of Drosophila melanogaster. I: A Golgi analysis of wild-type structure. *Cell Tissue Res* **258**:441–475. doi:doi: 10.1007/BF00218858
- Foerster S, Hill MFE, Franklin RJM. 2019. Diversity in the oligodendrocyte lineage : Plasticity or heterogeneity ? *Glia* **67**:1797–1805. doi:10.1002/glia.23607
- Freeman MR. 2015. Drosophila Central Nervous System Glia. *Cold Spring Harb Perspect Biol* **7**:a020552.
- Freeman MR, Doherty J. 2006. Glial cell biology in Drosophila and vertebrates. *Trends Neurosci* **29**:82–90. doi:10.1016/j.tins.2005.12.002
- Golgi C. 1903. Opera Omnia. Milano: Ulrico Hoepli.
- Goto A, Kadowaki T, Kitagawa Y. 2003. Drosophila hemolectin gene is expressed in embryonic and larval hemocytes and its knock down causes bleeding defects. *Dev Biol* **264**:582–591. doi:10.1016/j.ydbio.2003.06.001
- Gouwens NW, Sorensen SA, Baftizadeh F, Berg J, Murphy GJ, Zeng H, Gouwens NW, Sorensen SA, Baftizadeh F, Budzillo A, Lee BR, Jarsky T, Alfiler L, Baker K, Barkan E, Berry K, Bertagnolli D, Bickley K, Bomben J, Braun T, Brouner K, Casper T, Crichton K, Daigle TL, Dalley R, Frates RA De, Dee N, Desta T, Lee SD, Dotson N, Egdorf T, Hadley K, Hawrylycz MJ, Henry AM, Hill D, Hupp M, Kebede S, Kim TK, Mcgraw M, Mccmillen D, Mukora A, Ng Lindsay, Ng Lydia, Ngo K, Nicovich PR, Oldre A. 2020. Integrated Morphoelectric and Transcriptomic Classification of Cortical GABAergic Cells II. *Cell* **183**:935–953. doi:10.1016/j.cell.2020.09.057
- Gouwens NW, Sorensen SA, Berg J, Lee C, Jarsky T, Ting J, Sunkin SM, Feng D, Anastassiou CA, Barkan E, Bickley K, Blesie N, Braun T, Brouner K, Budzillo A, Caldejon S, Casper T, Castelli D, Chong P, Crichton K, Cuhaciyen C, Daigle TL, Dalley R, Dee N, Desta T, Ding S, Dingman S, Doperalski A, Dotson N, Egdorf T, Fisher M, Frates RA De, Garren E, Garwood M, Gary A, Gaudreault N, Godfrey K, Gorham M, Gu H, Habel C, Hadley K, Harrington J, Harris JA, Henry A, Hill D, Josephsen S, Kebede S, Kim L, Kroll M, Lee B, Lemon T, Link KE, Liu X, Long B, Mann R, Mcgraw M, Mihalas S, Mukora A, Murphy GJ, Ng Lindsay, Ngo K, Nguyen TN, Nicovich PR, Oldre A, Park D, Parry S, Perkins J, Potekhina L, Reid D, Robertson M, Sandman D, Schroedter M,



- Slaughterbeck C, Soler-Illavina G, Sulc J, Szafer A, Tasic B, Taskin N, Teeter C, Thatra N, Tung H, Wakeman W, Williams G, Young R, Zhou Z, Farrell C, Peng H, Hawrylycz MJ, Lein E, Ng Lydia, Arkhipov A, Bernard A, Phillips JW, Zeng H. 2019. Classification of electrophysiological and morphological neuron types in the mouse visual cortex. *Nat Neurosci* **22**:1182–1195. doi:10.1038/s41593-019-0417-0
- Grabert K, Michoel T, Karavolos MH, Clohisey S, Baillie JK, Stevens MP, Freeman TC, Summers KM, Mccoll BW. 2016. Microglial brain region – dependent diversity and selective regional sensitivities to aging. *Nat Neurosci* **19**:504–516. doi:10.1038/nn.4222
- Hao Y, Hao S, Andersen-nissen E, Gottardo R, Smibert P, Hao Y, Hao S, Andersen-nissen E, Iii WMM, Zheng S, Butler A, Papalexi E, Mimitou EP, Jain J, Srivastava A, Stuart T, Fleming LM, Yeung B. 2021. Resource Integrated analysis of multimodal single-cell data II II Integrated analysis of multimodal single-cell data. *Cell* **184**:3573–3587. doi:10.1016/j.cell.2021.04.048
- Hartenstein V, Nassif C, Lekven A. 1998. Embryonic Development of the Drosophila Brain. II. Pattern of Glial Cells. *J Comp Neurol* **402**:32–47.
- Harty B, Monk K. 2017. Unwrapping the unappreciated: recent progress in Remak Schwann cell biology. *Curr Opin Neurobiol* **47**:131–137.
- Ho T, Wu W, Hung S, Liu T, Lee Y. 2019. Expressional Profiling of Carpet Glia in the Developing Drosophila Eye Reveals Its Molecular Signature of Morphology Regulators. *Front Neurosci* **13**:244. doi:10.3389/fnins.2019.00244
- Jessen KR, Mirsky R, Lloyd AC. 2015. Schwann Cells : Development and Role in Nerve Repair. *Cold Spring Harb Perspect Biol* **7**:a020487.
- Kamen Y, Pivonkova H, Evans KA, Káradóttir RT. 2022. A Matter of State : Diversity in Oligodendrocyte Lineage Cells. doi:10.1177/1073858420987208
- Kato K, Orihara-ono M, Awasaki T. 2020. Multiple lineages enable robust development of the neuropil-glia architecture in adult Drosophila. doi:10.1242/dev.184085
- Kepecs A, Fishell G. 2014. Interneuron cell types are fit to function. *Nature* **505**:318–326. doi:10.1038/nature12983
- Khakh BS, Deneen B. 2019. The Emerging Nature of Astrocyte Diversity.
- Khakh BS, Sofroniew M V. 2015. Diversity of astrocyte functions and phenotypes in neural circuits. doi:10.1038/nn.4043
- Konstantinides N, Holguera I, Rossi AM, Escobar A, Dudragne L, Chen Y, Tran TN, Jaimes AMM, Özel MN, Simon F, Shao Z, Tsankova NM, Fullard JF. 2022. A complete temporal transcription factor series in the fly visual system. *Nature* **604**:316–322. doi:10.1038/s41586-022-04564-w
- Konstantinides N, Kapuralin K, Fadil C, Barboza L, Satija R, Desplan C. 2018. Phenotypic Convergence : Distinct Transcription Factors Regulate Common Terminal Features. *Cell* **174**:622–635. doi:10.1016/j.cell.2018.05.021
- Kremer MC, Jung C, Batelli S, Rubin GM, Gaul U. 2017. The Glia of the Adult Drosophila Nervous System. *Glia* **65**:606–638. doi:10.1002/glia.23115
- Kurmangaliyev YZ, Yoo J, Valdes-aleman J, Sanfilippo P, Zipursky SL, Kurmangaliyev YZ, Yoo J, Valdes-aleman J, Sanfilippo P, Zipursky SL. 2020. Transcriptional Programs of Circuit Assembly in the Drosophila Visual System. *Neuron* **108**:1045–1057. doi:10.1016/j.neuron.2020.10.006
- Lago-Baldaia I, Fernandes VM, Ackerman SD, Czopka T, Smith CJ, Schirmeier S, Ackerman SD. 2020. More Than Mortar : Glia as Architects of Nervous System Development and Disease **8**:611269. doi:10.3389/fcell.2020.611269
- Lancichinetti A, Fortunato S. 2011. Limits of modularity maximization in community detection AND SPLITTING CLUSTERS. *Phys Rev E* **84**:066122. doi:10.1103/PhysRevE.84.066122
- Lanjakornsiripan D, Pior B-J, Kawaguchi D, Furutachi S, Tahara T, Katsuyama Y, Suzuki Y, Fukazawa Y, Gotoh Y. 2018. Layer-specific morphological and molecular differences in neocortical astrocytes and their dependence on neuronal layers. *Nat Commun* **9**:1623. doi:10.1038/s41467-018-03940-3
- Lassetter AP, Corty MM, Barria R, Sheehan AE, Hill J, Aicher SA, Fox AN, Freeman MR. 2021. Glial

- TGF $\beta$  activity promotes axon survival in peripheral nerves. *bioRxiv* 2021.09.02.458753.  
doi:10.1101/2021.09.02.458753
- Li H, Horns F, Wu B, Luginbuhl DJ, Quake SR, Li H, Horns F, Wu B, Xie Q, Li J, Li T, Luginbuhl DJ, Quake SR. 2017. Classifying Drosophila Olfactory Projection Neuron Resource Classifying Drosophila Olfactory Projection Neuron Subtypes by Single-Cell RNA Sequencing. *Cell* **171**:1206–1207.  
doi:10.1016/j.cell.2017.10.019
- Li H, Janssens J, Waegeneer M De, Kolluru SS, Davie K, Spanier K, Leskovec J, Mclaughlin CN, Xie Q, Jones RC, Brueckner K, Shim J, Tattikota SG, Schnorrer F, Rust K, Nystul TG, Carvalho-santos Z, Ribeiro C, Pal S, Mahadevaraju S, Przytycka TM, Allen AM, Goodwin SF, Berry CW, Fuller MT, White-cooper H, Matunis EL, Dinardo S, Galenza A, Brien LEO, Dow JAT, Consortium FCA, Jasper H, Oliver B, Perrimon N. 2022. Fly Cell Atlas: A single-nucleus transcriptomic atlas of the adult fruit fly. *Science (80- )* **375**:991. doi:10.1126/science.abk2432
- Mark B, Lai S, Zarin AA, Manning L, Pollington HQ, Litwin-kumar A, Cardona A, Truman JW, Doe CQ. 2021. A developmental framework linking neurogenesis and circuit formation in the Drosophila CNS. *Elife* **10**:e67510.
- Marques S, Van Bruggen D, Vanichkina DP, Hjerling-leffler J, Taft RJ, Marques S, Bruggen D Van, Vanichkina DP, Floriddia EM. 2018. Transcriptional Convergence of Oligodendrocyte Lineage Progenitors during Development Resource Transcriptional Convergence of Oligodendrocyte Lineage Progenitors during Development. *Dev Cell* **46**:504–517.  
doi:10.1016/j.devcel.2018.07.005
- Marsh SE, Walker AJ, Kamath T, Dissing-olesen L, Hammond TR, Soysa TY De, Young AMH, Murphy S, Abdulraouf A, Nadaf N, Dufort C, Walker AC, Lucca LE, Kozareva V, Vanderburg C, Hong S, Bulstrode H, Hutchinson PJ, Gaffney DJ, Hafler DA, Franklin RJM, Macosko EZ. 2022. Dissection of artifactual and confounding glial signatures by single-cell sequencing of mouse and human brain. *Nat Neurosci* **25**:306–316. doi:10.1038/s41593-022-01022-8
- Mayer F, Mayer N, Chinn L, Pinsonneault RL, Kroetz D, Bainton RJ. 2009. Evolutionary Conservation of Vertebrate Blood – Brain Barrier Chemoprotective Mechanisms in Drosophila. *J Neurosci* **29**:3538–3550. doi:10.1523/JNEUROSCI.5564-08.2009
- Murphy-Royal C, Dupuis JP, Varela JA, Panatier A, Pinson B, Baufreton J, Groc L, Oliet SHR. 2015. Surface diffusion of astrocytic glutamate transporters shapes synaptic transmission. *Nat Neurosci* **18**:219–226. doi:10.1038/nn.3901
- Muthukumar AK, Stork T, Freeman MR. 2014. Activity-dependent regulation of astrocyte GAT levels during synaptogenesis. *Nat Neurosci* **17**:1340–1350. doi:10.1038/nn.3791
- Ohshima S, Villarimo C, Gailey DA. 1997. Reassessment of 79B actin gene expression in the abdomen of adult Drosophila melanogaster. *Insect Mol Biol* **6**:227–231.
- Özel MN, Simon F, Jafari S, Holguera I, Chen Y, Benhra N, El-danaf RN, Kapuralin K, Malin JA, Konstantinides N, Desplan C. 2021. Neuronal diversity and convergence in a visual system developmental atlas. *Nature* **589**:88–95. doi:10.1038/s41586-020-2879-3
- Parfejevs V, Debbache J, Shakhova O, Schaefer SM, Glausch M, Wegner M, Suter U, Riekstina U, Werner S, Sommer L. 2018. Injury-activated glial cells promote wound healing of the adult skin in mice. *Nat Commun* **9**:236. doi:10.1038/s41467-017-01488-2
- Peco E, Davla S, Camp D, Stacey SM, Landgraf M, Meyel DJ Van. 2016. Drosophila astrocytes cover specific territories of the CNS neuropil and are instructed to differentiate by Prospero , a key effector of Notch. *Development* **143**:1170–1181. doi:10.1242/dev.133165
- Pfeiffer BD, Jenett A, Hammonds AS, Ngo TB, Misra S, Murphy C, Scully A, Carlson JW, Wan KH, Laverty TR, Mungall C, Svirskas R, Kadonaga JT, Doe CQ, Eisen MB, Celniker SE, Rubin GM. 2008. Tools for neuroanatomy and neurogenetics in Drosophila **105**:9715–9720.
- Pogodalla N, Winkler B, Klämbt C. 2022. Glial Tiling in the Insect Nervous System. *Front Cell Neurosci* **16**:825695. doi:10.3389/fncel.2022.825695
- Que L, Lukacsovich D, Luo W, Földy C. 2021. Transcriptional and morphological profiling of parvalbumin interneuron subpopulations in the mouse hippocampus. *Nat Commun* **12**:108.

- doi:10.1038/s41467-020-20328-4
- Ramón y Cajal S. 1899. *Histología del sistema nervioso del hombre y de los vertebrados*, 1st ed. Madrid: Agencia Estatal Boletín Oficial del Estado.
- Reilly MB, Cros C, Varol E, Yemini E, Hobert O. 2020. Unique homeobox codes delineate all the neuron classes of *C. elegans*. *Nature* **584**:595–601. doi:10.1038/s41586-020-2618-9
- Richier B, Vijandi CDM, Mackensen S, Salecker I. 2017. Lapsyn controls branch extension and positioning of astrocyte-like glia in the *Drosophila* optic lobe. *Nat Commun* **8**:317. doi:10.1038/s41467-017-00384-z
- Schwabe T, Bainton RJ, Fetter RD, Heberlein U, Gaul U, Francisco S. 2005. for Blood-Brain Barrier Formation in *Drosophila*. *Cell* **123**:133–144. doi:10.1016/j.cell.2005.08.037
- Seroka A, Lai S, Doe CQ. 2022. Transcriptional profiling from whole embryos to single neuroblast lineages in *Drosophila*. *Dev Biol* **489**:21–33. doi:10.1016/j.ydbio.2022.05.018
- Simon F, Konstantinides N. 2021. Single-cell transcriptomics in the *Drosophila* visual system : Advances and perspectives on cell identity regulation , connectivity , and neuronal diversity evolution. *Dev Biol* **479**:107–122. doi:10.1016/j.ydbio.2021.08.001
- Spitzer SO, Sitnikov S, Kamen Y, Faria O De, Agathou S, Spitzer SO, Sitnikov S, Kamen Y, Evans KA, Kronenberg-versteeg D. 2019. Oligodendrocyte Progenitor Cells Become Regionally Diverse and Heterogeneous with Age Article Oligodendrocyte Progenitor Cells Become Regionally Diverse and Heterogeneous with Age. *Neuron* **101**:459–471. doi:10.1016/j.neuron.2018.12.020
- Stork T, Sheehan A, Tasdemir-yilmaz OE, Freeman MR. 2014. Glia Interactions through the Heartless FGF Receptor Signaling Pathway Mediate Morphogenesis of *Drosophila* Astrocytes. *Neuron* **83**:388–403. doi:10.1016/j.neuron.2014.06.026
- Sun W, Cornwell A, Li J, Peng S, Osorio MJ, Aalling N, Wang S, Benraiss A, Lou N, Goldman SA, Nedergaard M. 2017. SOX9 Is an Astrocyte-Specific Nuclear Marker in the Adult Brain Outside the Neurogenic Regions. *J Neurosci* **37**:4493 LP – 4507. doi:10.1523/JNEUROSCI.3199-16.2017
- Vaessin H, Grell E, Wolff E, Bier E, Jan LY, Jan YN. 1991. prospero Is Expressed in Neuronal Precursors and Encodes a Nuclear Protein That Is Involved in the Control of Axonal Outgrowth in *Drosophila*. *Cell* **67**:941–953.
- Volkenhoff A, Weiler A, Letzel M, Stehling M, Klämbt C, Schirmeier S. 2015. Glial Glycolysis Is Essential for Neuronal Survival in Article Glial Glycolysis Is Essential for Neuronal Survival in *Drosophila*. *Cell Metab* **22**:437–447. doi:10.1016/j.cmet.2015.07.006
- Westergard T, Rothstein JD. 2020. Astrocyte Diversity : Current Insights and Future Directions. *Neurochem Res* **45**:1298–1305. doi:10.1007/s11064-020-02959-7
- White J, Southgate E, Thomson J, Brenner S. 1986. The structure of the nervous system of the nematode *Caenorhabditis elegans*. *Philos Trans R Soc L B Biol Sci* **314**:1–340.
- Wickham H. 2016. ggplot2: Elegant Graphics for Data Analysis. New York: Springer-Verlag.
- Wilson ER, Nunes GD, Frick LR, Feltri ML, Weaver MR, Feltri ML, Kelly HJ. 2021. Schwann cell interactions during the development of the peripheral nervous system. *Dev Neurobiol* **81**:464–489. doi:10.1002/dneu.22744
- Yu G, Wang L-G, Han Y, He Q-Y. 2012. clusterProfiler : an R Package for Comparing Biological Themes Among Gene Clusters. *Omi A J Integr Biol* **16**:284–287. doi:10.1089/omi.2011.0118
- Zheng GXY, Terry JM, Belgrader P, Ryvkin P, Bent ZW, Wilson R, Ziraldo SB, Wheeler TD, Mcdermott GP, Zhu J, Gregory MT, Shuga J, Montesclaros L, Underwood JG, Masquelier DA, Nishimura SY, Schnall-levin M, Wyatt PW, Hindson CM, Bharadwaj R, Wong A, Ness KD, Beppu LW, Deeg HJ, Mcfarland C, Loeb KR, Valente WJ, Ericson NG, Stevens EA, Radich JP, Mikkelsen TS, Hindson BJ, Bielas JH. 2017. Massively parallel digital transcriptional profiling of single cells. *Nat Commun* **8**:14049. doi:10.1038/ncomms14049
- Zhou B, Xia Y, Ruo Z, Jiang T. 2019. Astrocyte morphology : Diversity, plasticity, and role in neurological diseases 665–673. doi:10.1111/cns.13123
- Zlatic M, Li F, Strigini M, Grueber W, Bate M. 2009. Positional Cues in the *Drosophila* Nerve Cord : Semaphorins Pattern the Dorso-Ventral Axis. *PLoS Biol* **7**:e1000135.

doi:10.1371/journal.pbio.1000135

Figure 1

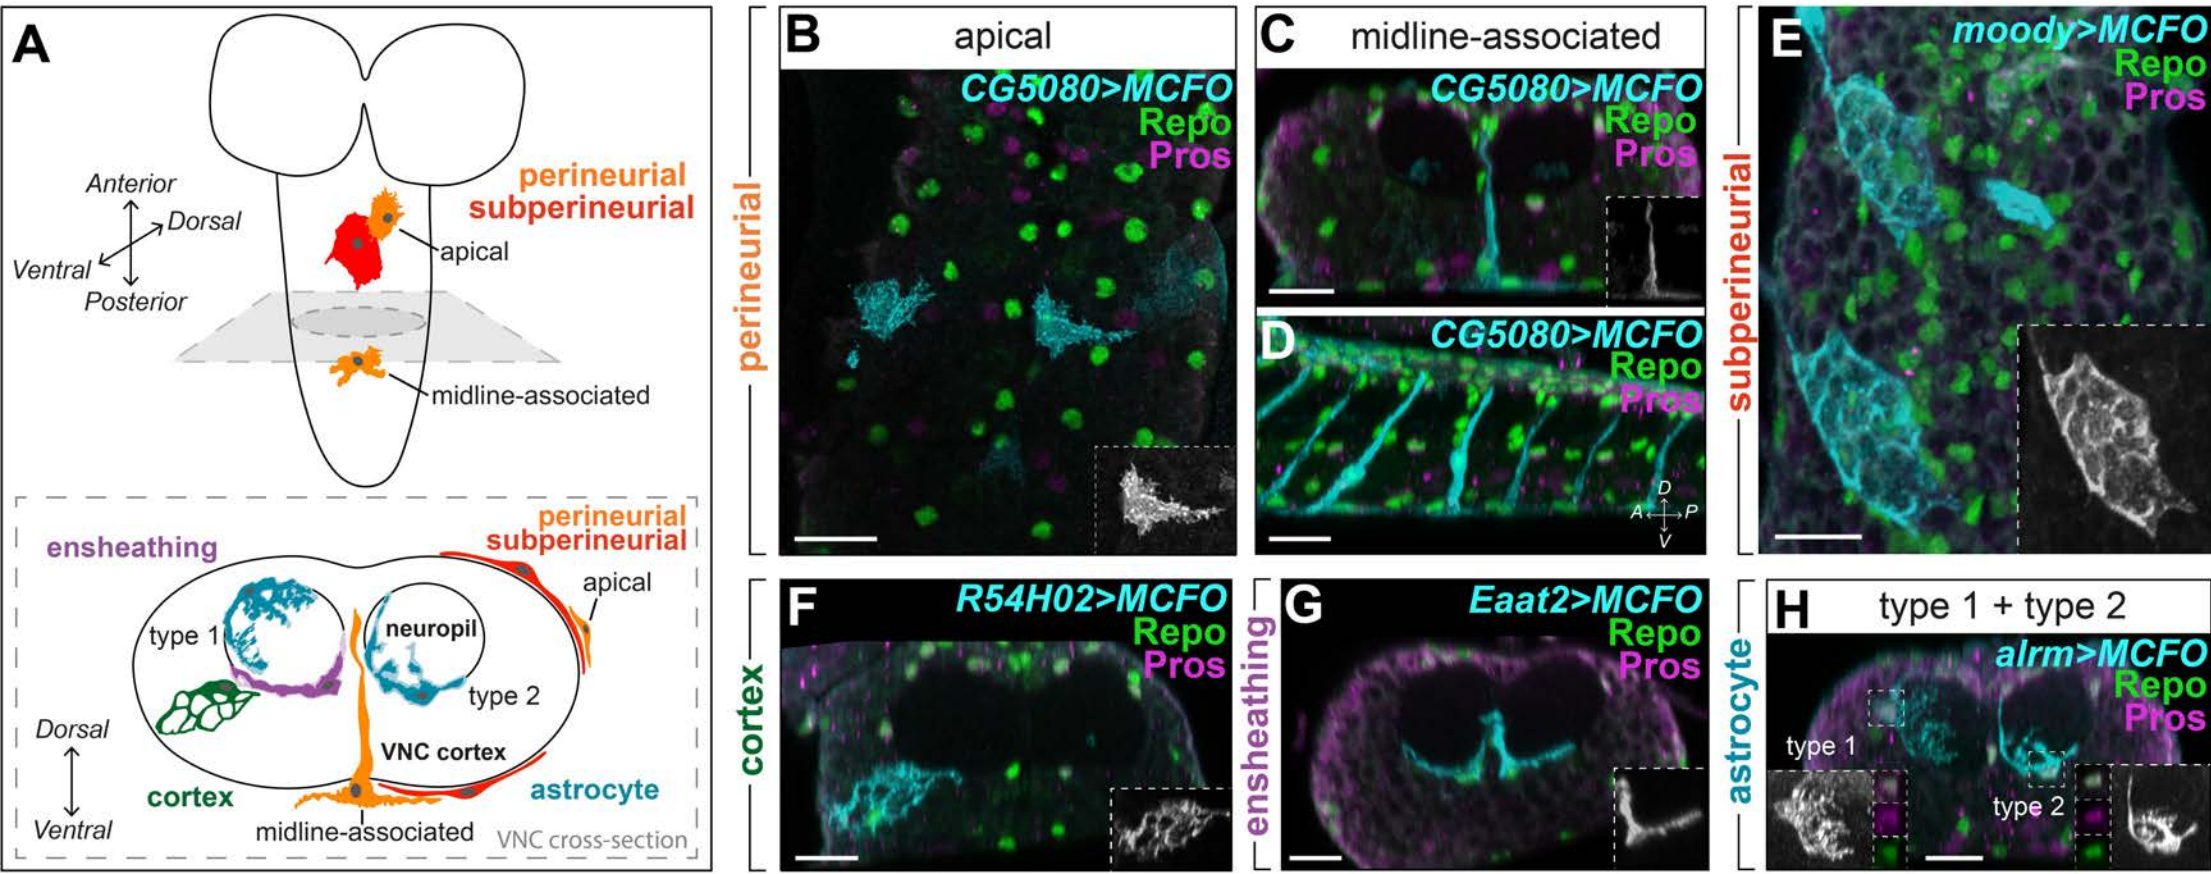

**Figure 1. Morphologies of embryonic VNC glia.**

- (A)** Schematic of the embryonic CNS and cross-section of the VNC with the five glial classes indicated.
- (B)** Surface view of the VNC showing apical perineurial glial cells on the surface with typical fibrous morphology.
- (C)** Cross-sectional view of the VNC showing a single midline-associated perineurial (MAP) glial cell at the midline of the VNC ventral surface, which sent a projection dorsally through the cortex.
- (D)** Lateral view of the VNC showing several MAP glia on the ventral surface, each sending a projection dorsally.
- (E)** Surface view of the VNC showing polygonal-shaped subperineurial glia on the surface.
- (F)** Cross-sectional view of the VNC showing a single cortex glial cell in the cortical region forming a membranous, honeycomb-like structure.
- (G)** Cross-sectional view of the VNC showing ensheathing glial cells at the border of the cortex and neuropil.
- (H)** Cross-sectional view of the VNC showing a type 1 astrocyte and a type 2 astrocyte sending processes into the neuropil. Type 1 astrocyte processes were highly ramified, whereas type 2 astrocyte processes were less ramified. Coexpression of Pros and Repo indicated astrocyte identity (insets).
- Cyan marks the MCFO clones for each panel, while green indicates Repo, and magenta indicates Pros. Insets show the MCFO clone in greyscale. All scale bars represent 10  $\mu\text{m}$ .

Figure 2

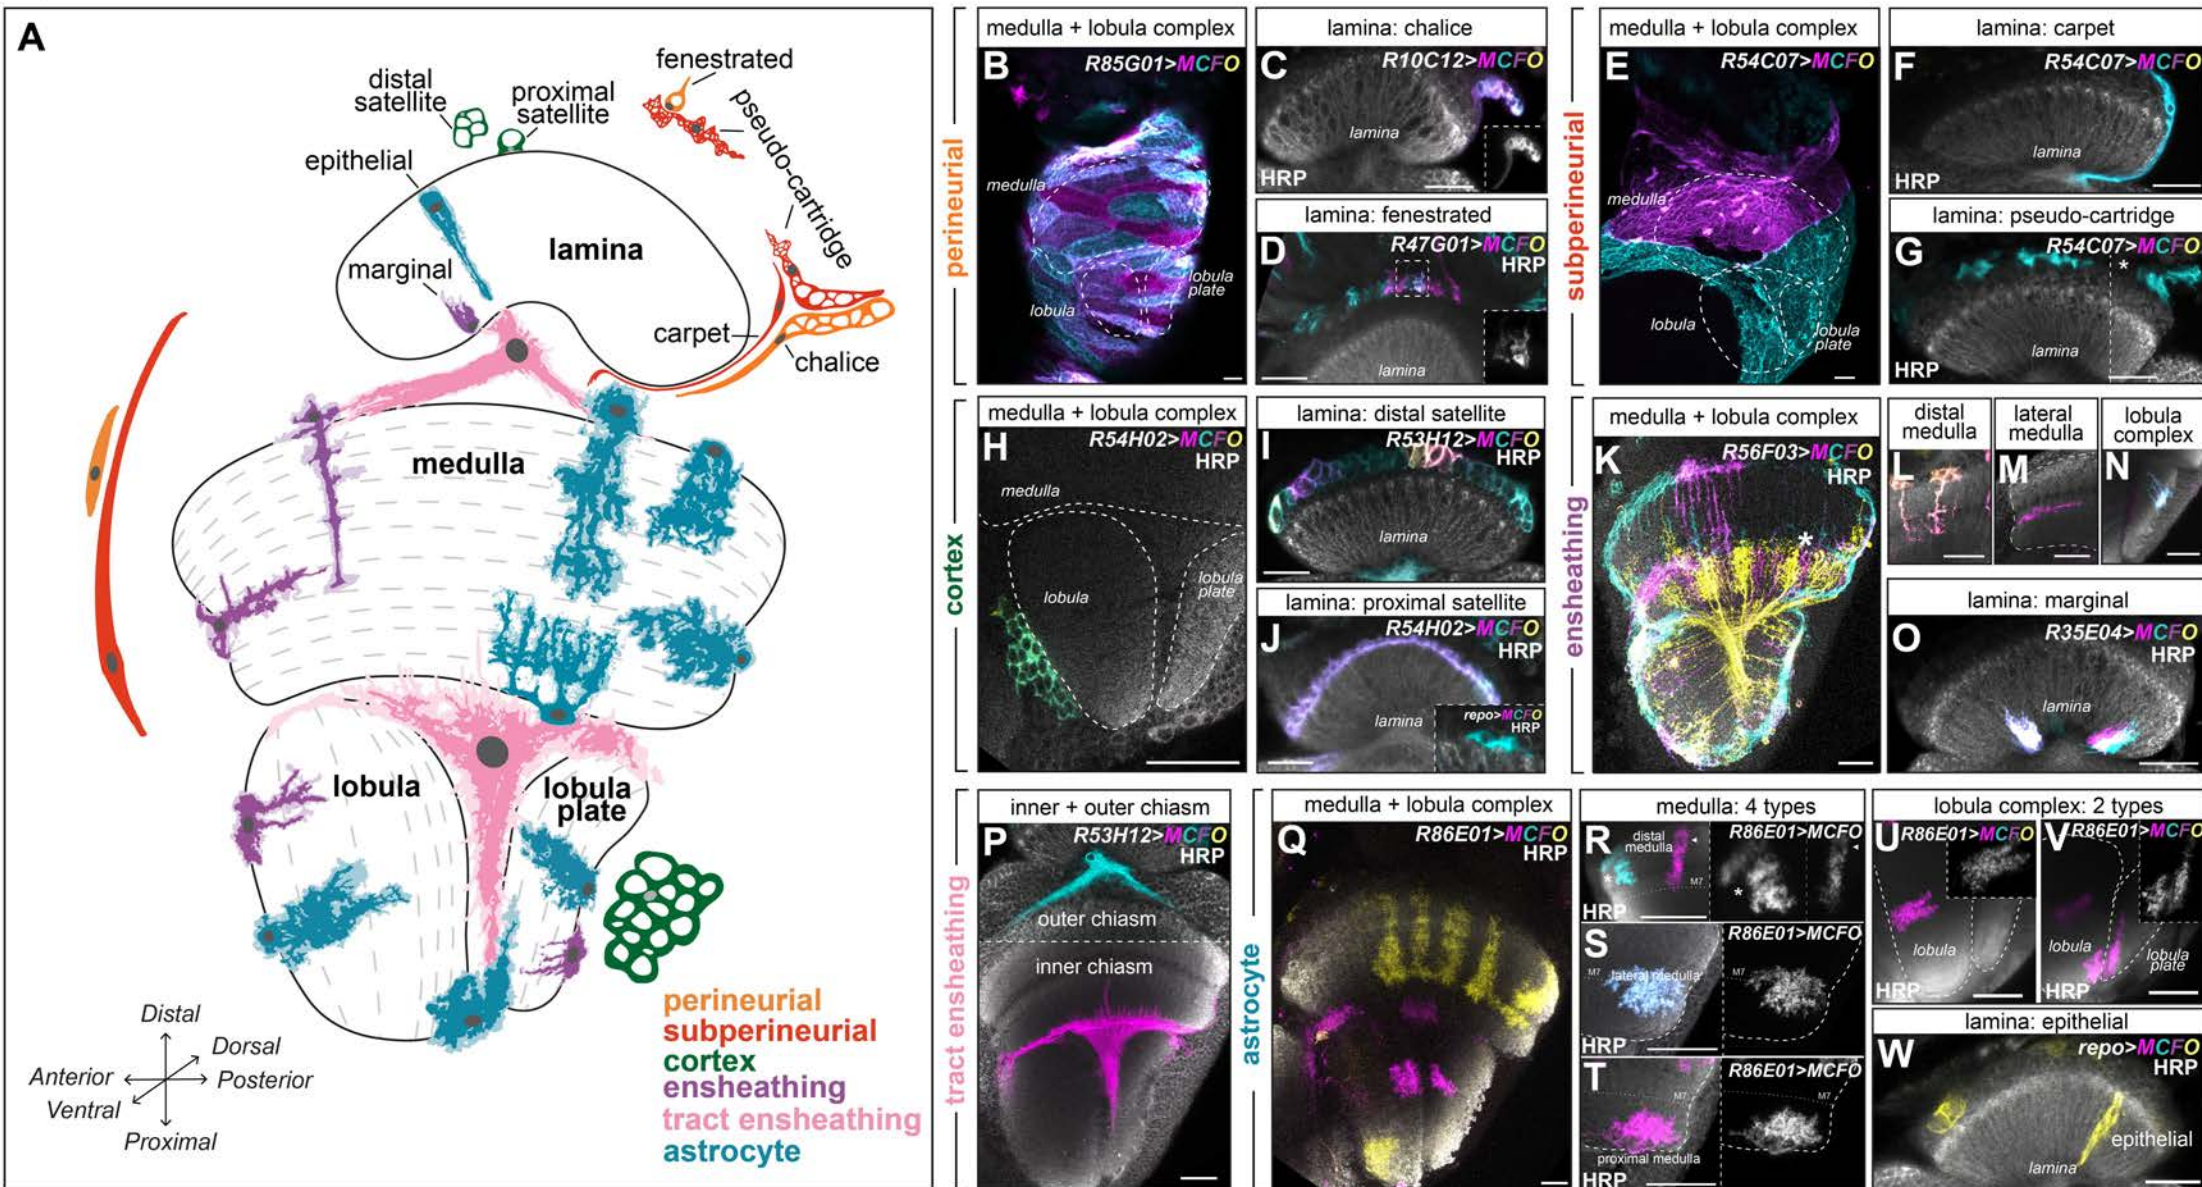

## Figure 2. Morphologies of glia in the adult optic lobe.

- (A) Schematic of the cross-section of the adult optic lobe and its four neuropils: lamina, medulla, lobula and lobula plate with glial classes indicated. Dashed lines indicate the layers of the specific neuropil.
- (B) Maximum projection showing MCFO clones of perineurial glial cells covering the medulla, lobula, and lobula plate. Cells were oblong-shaped and tiled together.
- (C) A cross-sectional view of the lamina showing a chalice glial cell (a type of lamina perineurial glia at the rim of the lamina cortex and neuropil).
- (D) A cross-sectional view of the lamina showing fenestrated glial cells (a type of lamina perineurial glia), separating the compound eye from the lamina.
- (E) Maximum projection showing MCFO clones of subperineurial glia that covered the medulla, lobula and lobula plate as large squamous cells that tiled together.
- (F) A cross-sectional view of the lamina showing a single carpet glia (a type of lamina subperineurial glia), along the rim of the lamina cortex and neuropil.
- (G) A cross-sectional view of the lamina showing pseudocartridge glia (a type of lamina subperineurial glia), as irregularly shaped cells above the lamina cortex.
- (H) A cross-sectional view of the medulla, lobula and lobula plate showing a single cortex glial cell in the lobula cortex with typical membranous and honeycomb-like morphology.
- (I) A cross-sectional view of the lamina showing distal satellite glia (a type of lamina cortex glia), excluded from the most proximal region of the lamina cortex. Note that inner chiasm glia were also labelled by this driver (bottom).
- (J) A cross-sectional view of the lamina showing proximal satellite glia in the most proximal region of the lamina. Inset shows a single proximal satellite glia labelled by *repo-Gal4*.
- (K) A cross-sectional view of the medulla, lobula and lobula plate showing MCFO clones labelling ensheathing glia and a subset of neurons (asterisk).
- (L) Examples of ensheathing glia in the distal medulla sending primary projections from the surface of the neuropil to layer M7.
- (M) An example of an ensheathing glial cell in the lateral medulla sending a primary from the outer neuropil surface inwards along layer M7.
- (N) An example of an ensheathing glial cell in the lobula plate neuropil sending several short processes with minimal secondary branches into the neuropil.
- (O) A cross-sectional view of the lamina showing marginal glia (a type of lamina-specific ensheathing glia), which project partway into the lamina neuropil from the distal neuropil surface.
- (P) A cross-sectional view of the optic lobe showing two morphologically distinct tract ensheathing glia (called chiasm glia) located in the outer chiasm between the lamina and medulla, or the inner chiasm between the medulla, lobula, and lobula plate. Outer chiasm glia did not send projections into the neuropils, but the inner chiasm glia projected into all three neuropils. The dashed line separates images in the same brain on different z-stacks.
- (Q) A cross-sectional view of the medulla, lobula and lobula plate showing astrocytes.
- (R) Examples of distal medulla astrocytes with short and long morphologies. The short distal medulla astrocyte (asterisk) projected to layer M5, while the long distal medulla astrocyte (arrowhead) projected to layer M8.
- (S) An example of a lateral medulla astrocyte projecting into the neuropil laterally along the M7/8 layers.
- (T) An example of a proximal medulla astrocyte (also called chandelier glia) projecting from the proximal surface of the medulla, up to layers M9 and M10.
- (U,V) Examples of astrocytes in the lobula and lobula plate, which (U) projected into the lobula neuropil from the cortex-neuropil border or (V) projected into both the lobula and lobula plate neuropils.
- (W) Example of an epithelial glial cell (right; the lamina astrocyte population), which projected across the entire distal-proximal neuropil length.



Cyan, yellow, magenta and purple mark the multi-color flip-out (MCFO) clones, while white labels horseradish peroxidase (HRP; neuropil marker) in the main panels. Insets show the MCFO clones in greyscale. Dashed lines are used to outline neuropil borders or separate an inset. All scale bars represent 20  $\mu\text{m}$ .

Figure 2 - FigS1

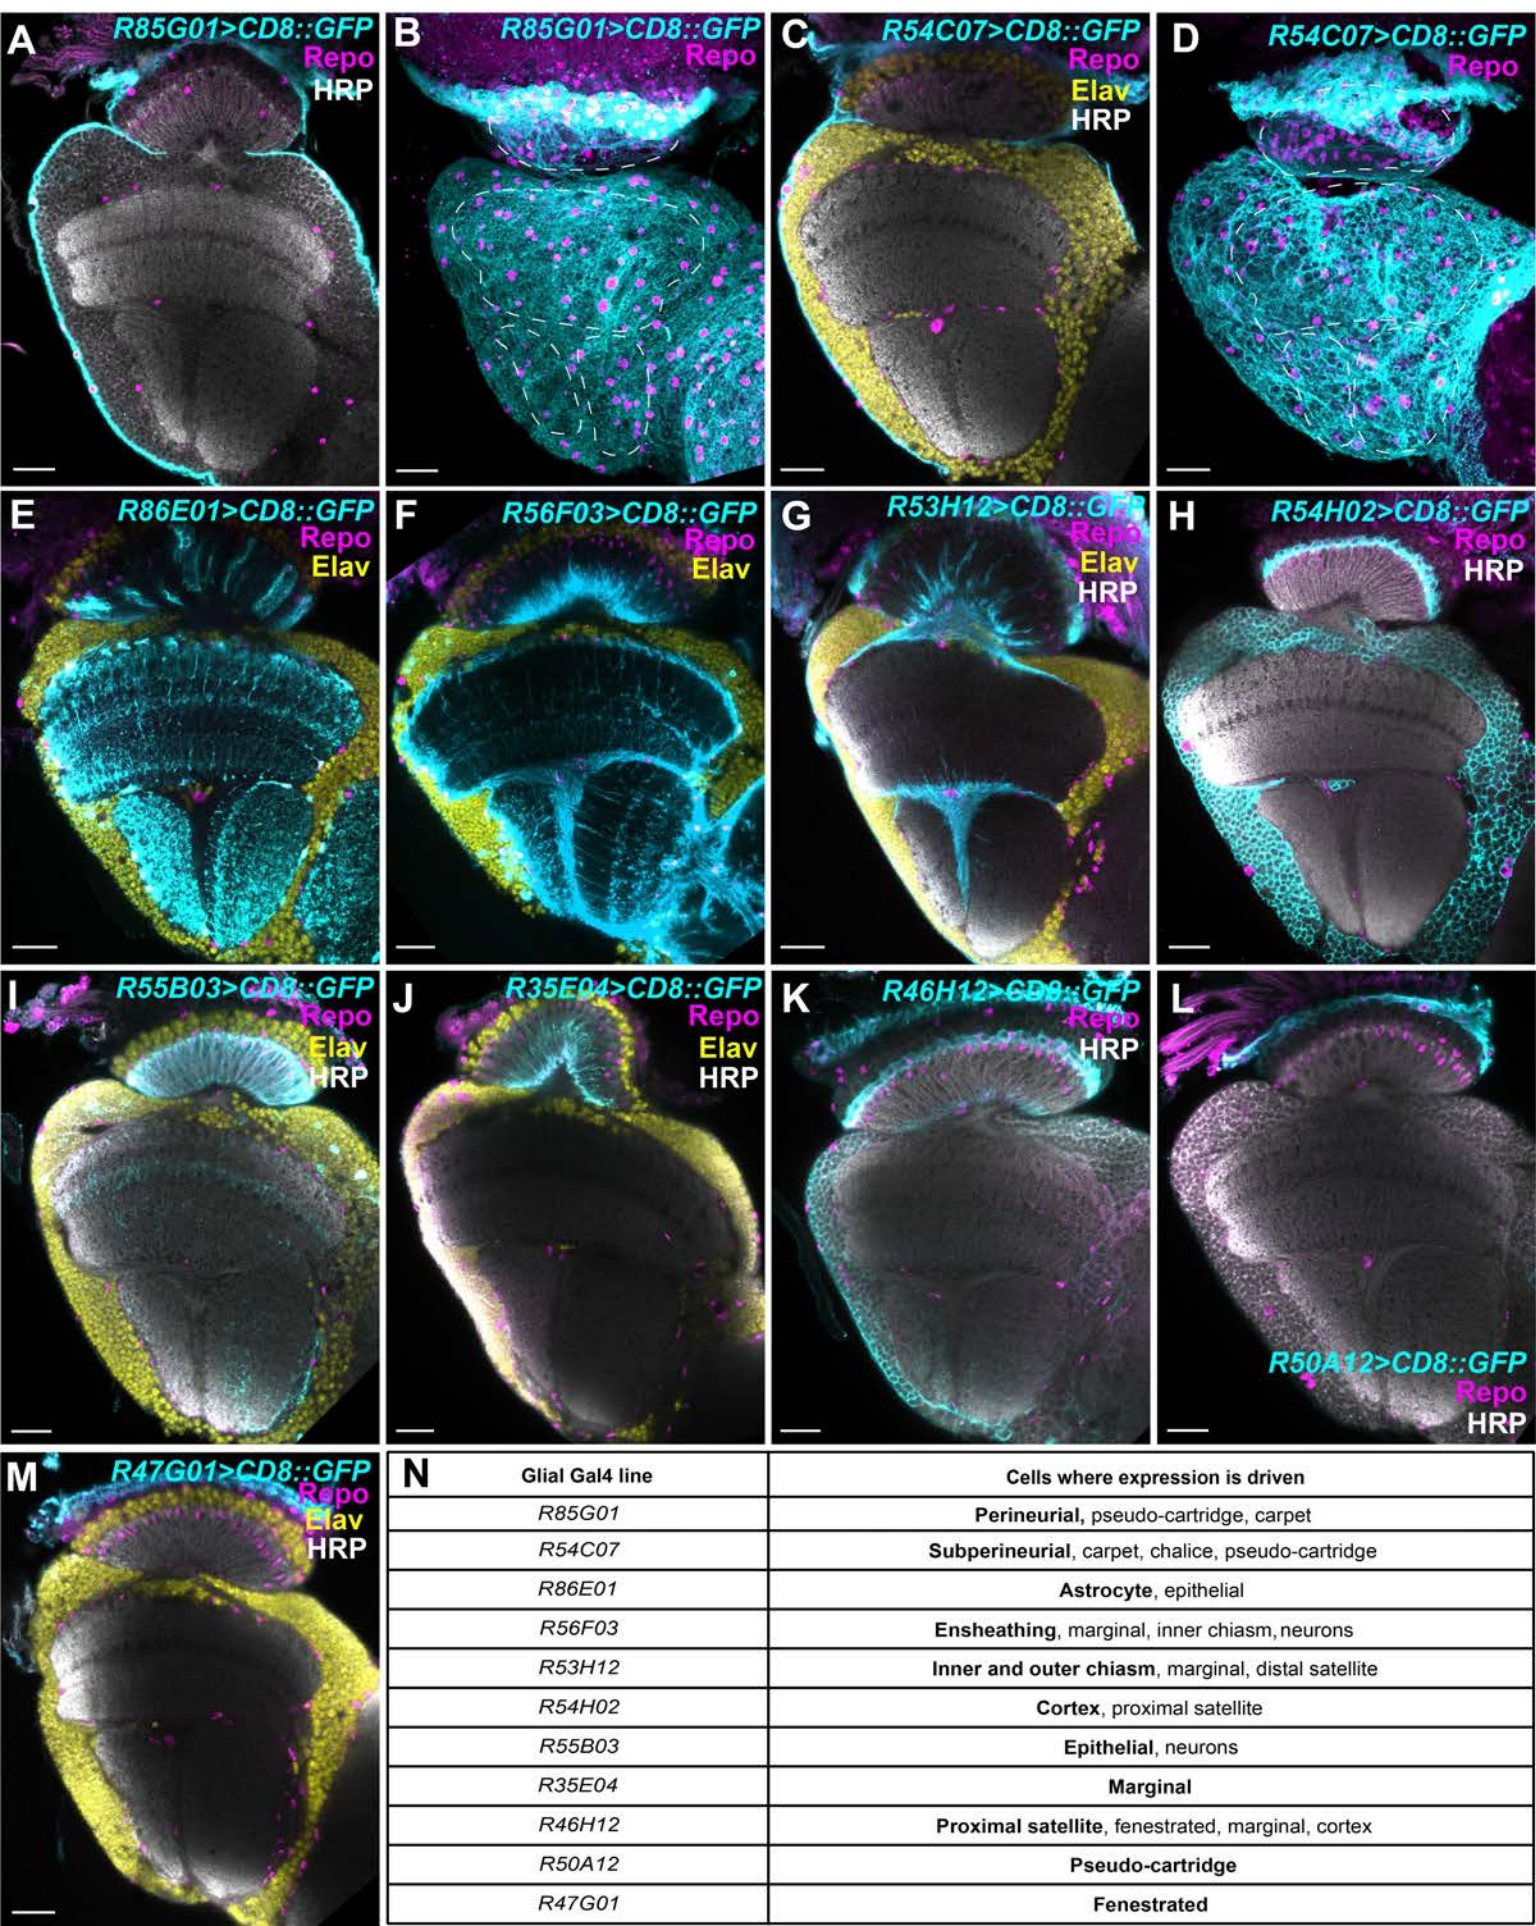

**Figure 2- supplementary figure S1. Expression patterns of the glial Gal4s drivers used to evaluate glial morphology in the *Drosophila* adult optic lobe.**

**(A-M)** GFP expression driven by the indicated glial Gal4 driver (described previously by Kremer et al. (2017) for the

**(A,B)** optic lobe perineurial glia,

**(C,D)** optic lobe subperineurial glia,

**(E)** optic lobe astrocyte glia,

**(F)** optic lobe ensheathing glia (not including chiasm glia; also drives expression in a subset of neurons),

**(G)** chiasm glia (and marginal glia),

**(H)** medulla, lobulla, and lobula plate cortex glia and proximal satellite glia,

**(I)** lamina astrocytes (epithelial glia),

**(J)** lamina ensheathing glia (marginal glia),

**(K)** lamina-specific cortex glia (proximal satellite glia),

**(L)** lamina subperineurial glia (pseudo-cartridge glia), and

**(M)** lamina perineurial glia (fenestrated glia).

**(N)** A table outlining the glial Gal4 lines and the glial subtypes that they drive expression within.

Where relevant, cyan marks CD8::GFP driven by the glia-Gal4, magenta marks Repo, yellow labels Elav and HRP labels the neuropils in white. Panels B and D are maximum projections showing the surface of the optic lobe. Dashed lines outline the neuropils. All scale bars represent 20  $\mu$ m.

Figure 3

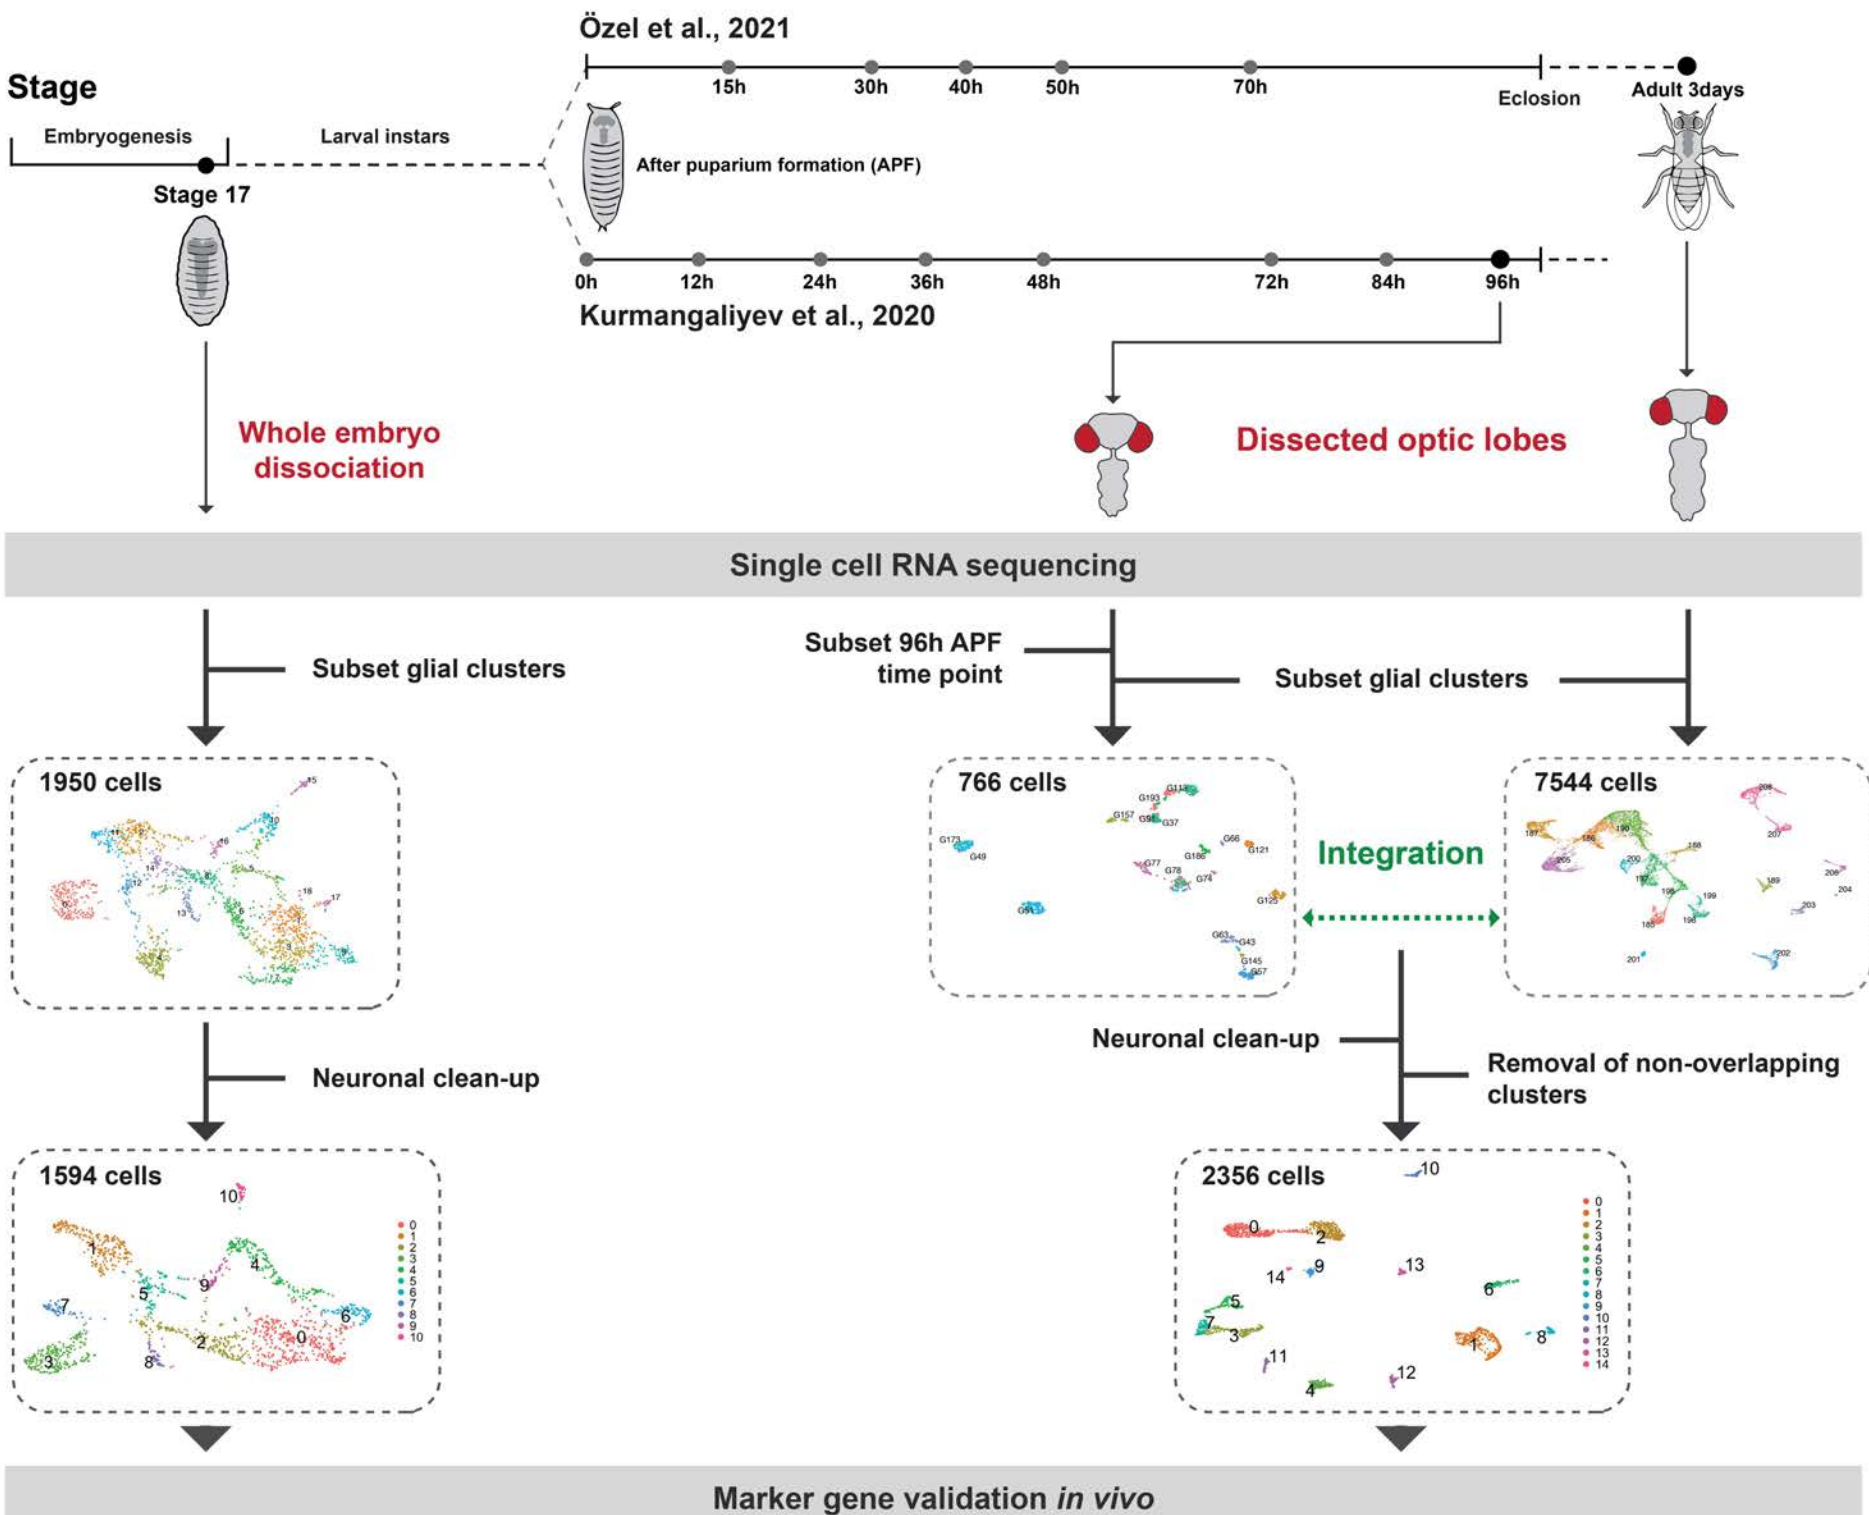

**Figure 3. Summary of the experimental and computational workflow used in this study.**

**(Left)** We performed scRNA-seq on whole stage 17 embryos. We then subsetted glial cells and eliminated neuronal contamination (see Materials and Methods). This resulted in 1594 cells and 11 clusters, which we proceeded to annotate by validating marker gene expression *in vivo*.

**(Right)** We isolated and integrated glial clusters from two published datasets of dissected optic lobes (Kurmangaliyev et al., 2020; Özel et al., 2021)(see also Figure 3 – supplementary figure S1). We eliminated neuronal contamination and clusters that contained cells from only the Özel et al. dataset (see Materials and Methods) (see also Figure 3 – supplementary figures S2 and S3). This resulted in 2356 cells and 15 glial clusters, which we went on to annotate by comparisons with cell-type-specific bulk RNA sequencing datasets and by validating marker gene expression *in vivo*.

# Figure 3 - FigS1

## A UMAP of glial clusters of adult optic lobe from Özel *et al.*, 2021

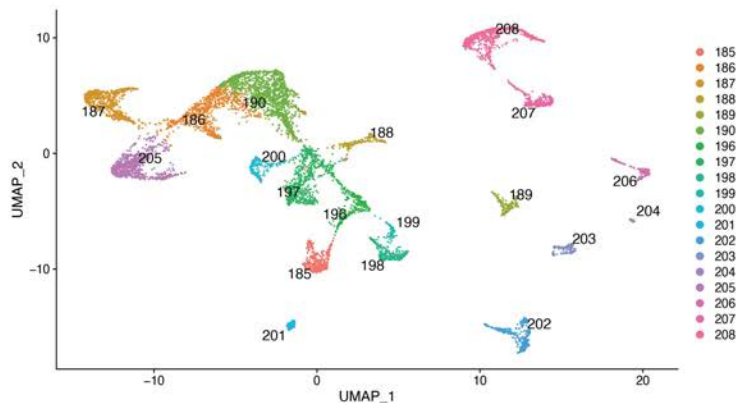

## B UMAP of glial clusters of 96h APF optic lobe from Kurmangaliyev *et al.*, 2020

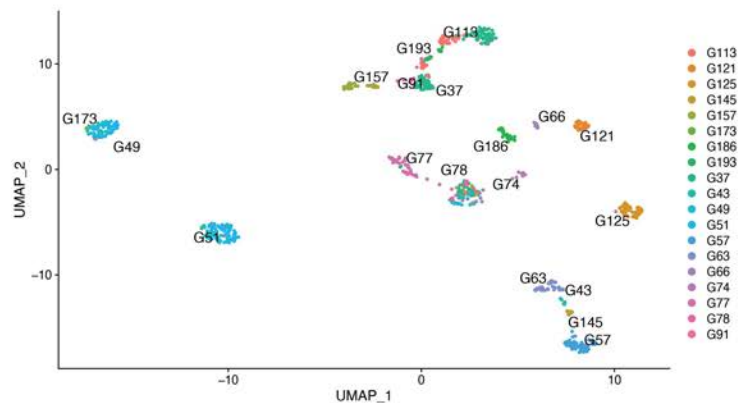

## C UMAP of integrated data, highlighting glial clusters of adult optic lobe from Özel *et al.*, 2021

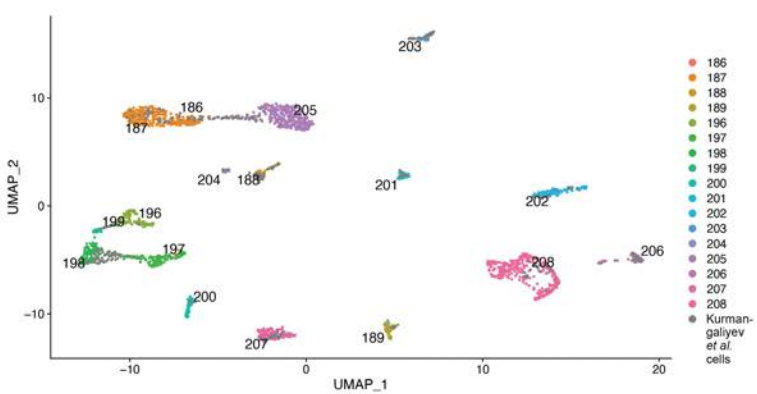

## D UMAP of integrated data, highlighting glial clusters of 96h APF optic lobe from Kurmangaliyev *et al.*, 2020

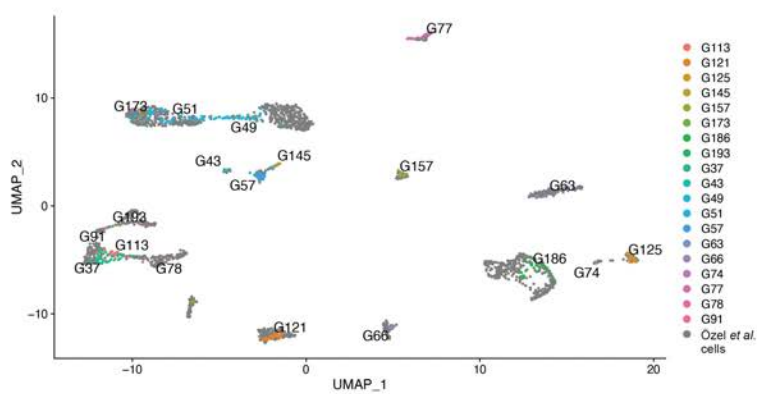

**Figure 3- supplementary figure S1. Contribution of the two datasets, 96h APF and 3-day-old adult, to the resulting integrated young adult optic lobe dataset.**

- (A)** UMAP of the 19 glial clusters from 3-day-old adult optic lobes, from Özel et al. (2021)
- (B)** UMAP of the 19 glial clusters from 96h APF optic lobes, from Kurmangaliyev et al. (2020).
- (C,D)** UMAP of the integrated young adult optic lobe dataset, highlighting the 3-day-old adult clusters (C) or 96h APF clusters (D) in colour, with 96h APF (C) and 3-day-old adult (D) cells in grey.

# Figure 3 - FigS2

## A Gene expression in integrated young adult optic lobe scRNA-seq - Glial clusters

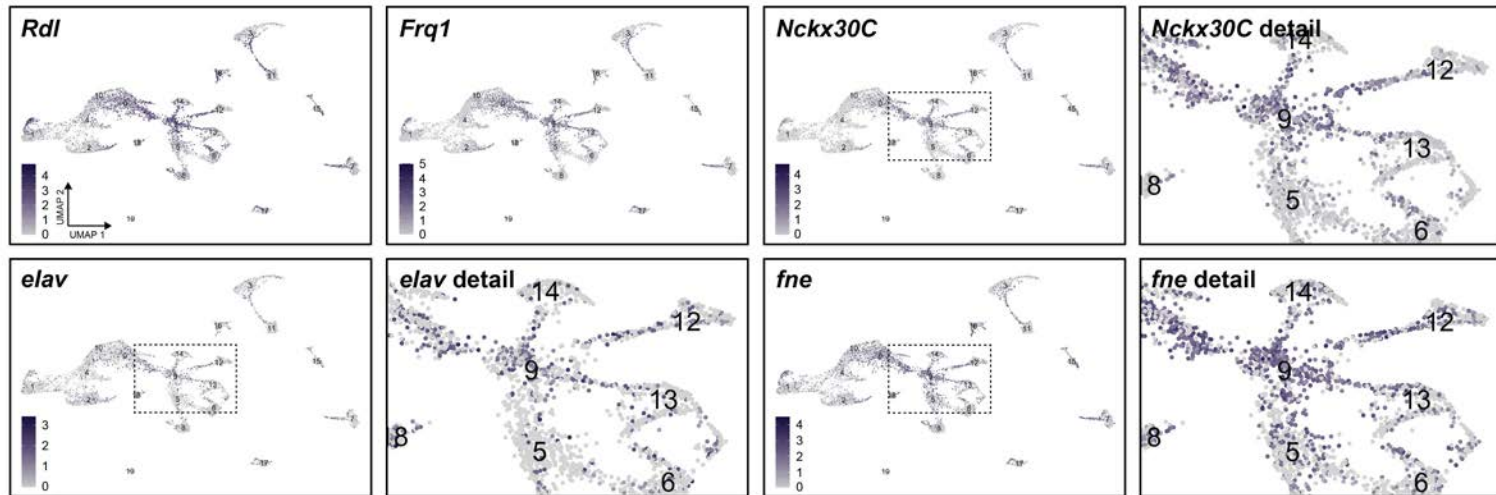

## B Gene expression in adult optic lobe scRNA-seq from Özel et al., 2021 - Neuronal and non-glia clusters

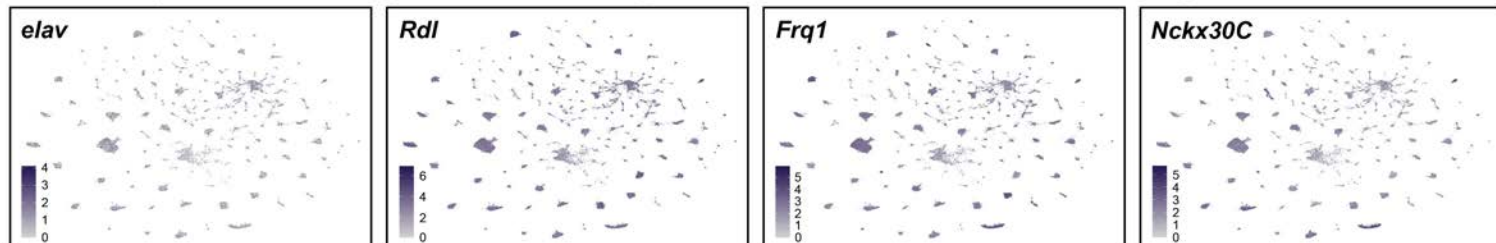

## C Gene expression in late embryo CNS scRNA-seq - Glial clusters

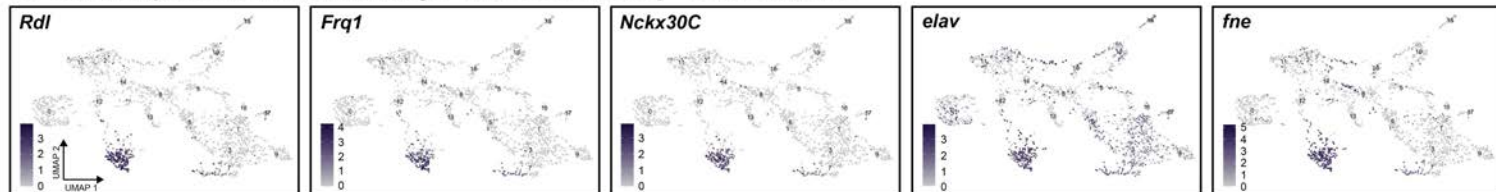

## D Gene expression in late embryo CNS scRNA-seq - Neuronal and non-glia clusters

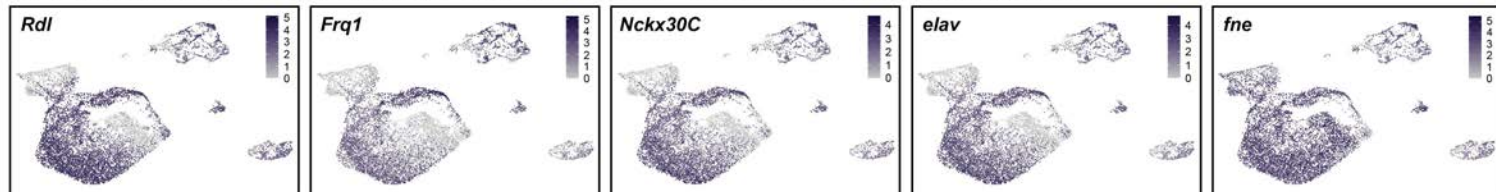



**Figure 3- supplementary figure S2. Contamination of glial clusters with cells with typical neuronal profile.**

**(A)** Expression levels of *Rdl*, *Frq1*, *Nckx30C*, *elav* and *fne* plotted on the young adult optic lobe integrated UMAP, before neuronal clean-up. Each dot represents a single cell, and the colour represents the level of expression as indicated. Zoomed-in details of the centre of the UMAP are shown for *Nckx30C*, *elav* and *fne*.

**(B)** Expression levels of *elav*, *Rdl*, *Frq1* and *Nckx30C* plotted on the 3-day-old adult optic lobe UMAP, from Özel et al., 2021, including all clusters except the 19 glial clusters. All four genes showed expression in all clusters, illustrating the pan-neuronal nature of *Rdl*, *Frq1* and *Nckx30C* expression.

**(C)** Expression levels of *Rdl*, *Frq1*, *Nckx30C* plotted on the embryonic glial UMAP, before neuronal clean-up. The expression of these three genes overlapped with the expression of *elav* and *fne*, mainly in cluster #4.

**(D)** Expression levels of *Rdl*, *Frq1* and *Nckx30C* *elav* and *fne* plotted on the UMAP of the embryonic nervous system clusters.

# Figure 3 - FigS3

bioRxiv preprint doi: <https://doi.org/10.1101/2022.08.01.502305>; this version posted August 3, 2022. The copyright holder for this preprint (which was not certified by peer review) is the author/funder, who has granted bioRxiv a license to display the preprint in perpetuity. It is made available under aCC-BY-ND 4.0 International license.

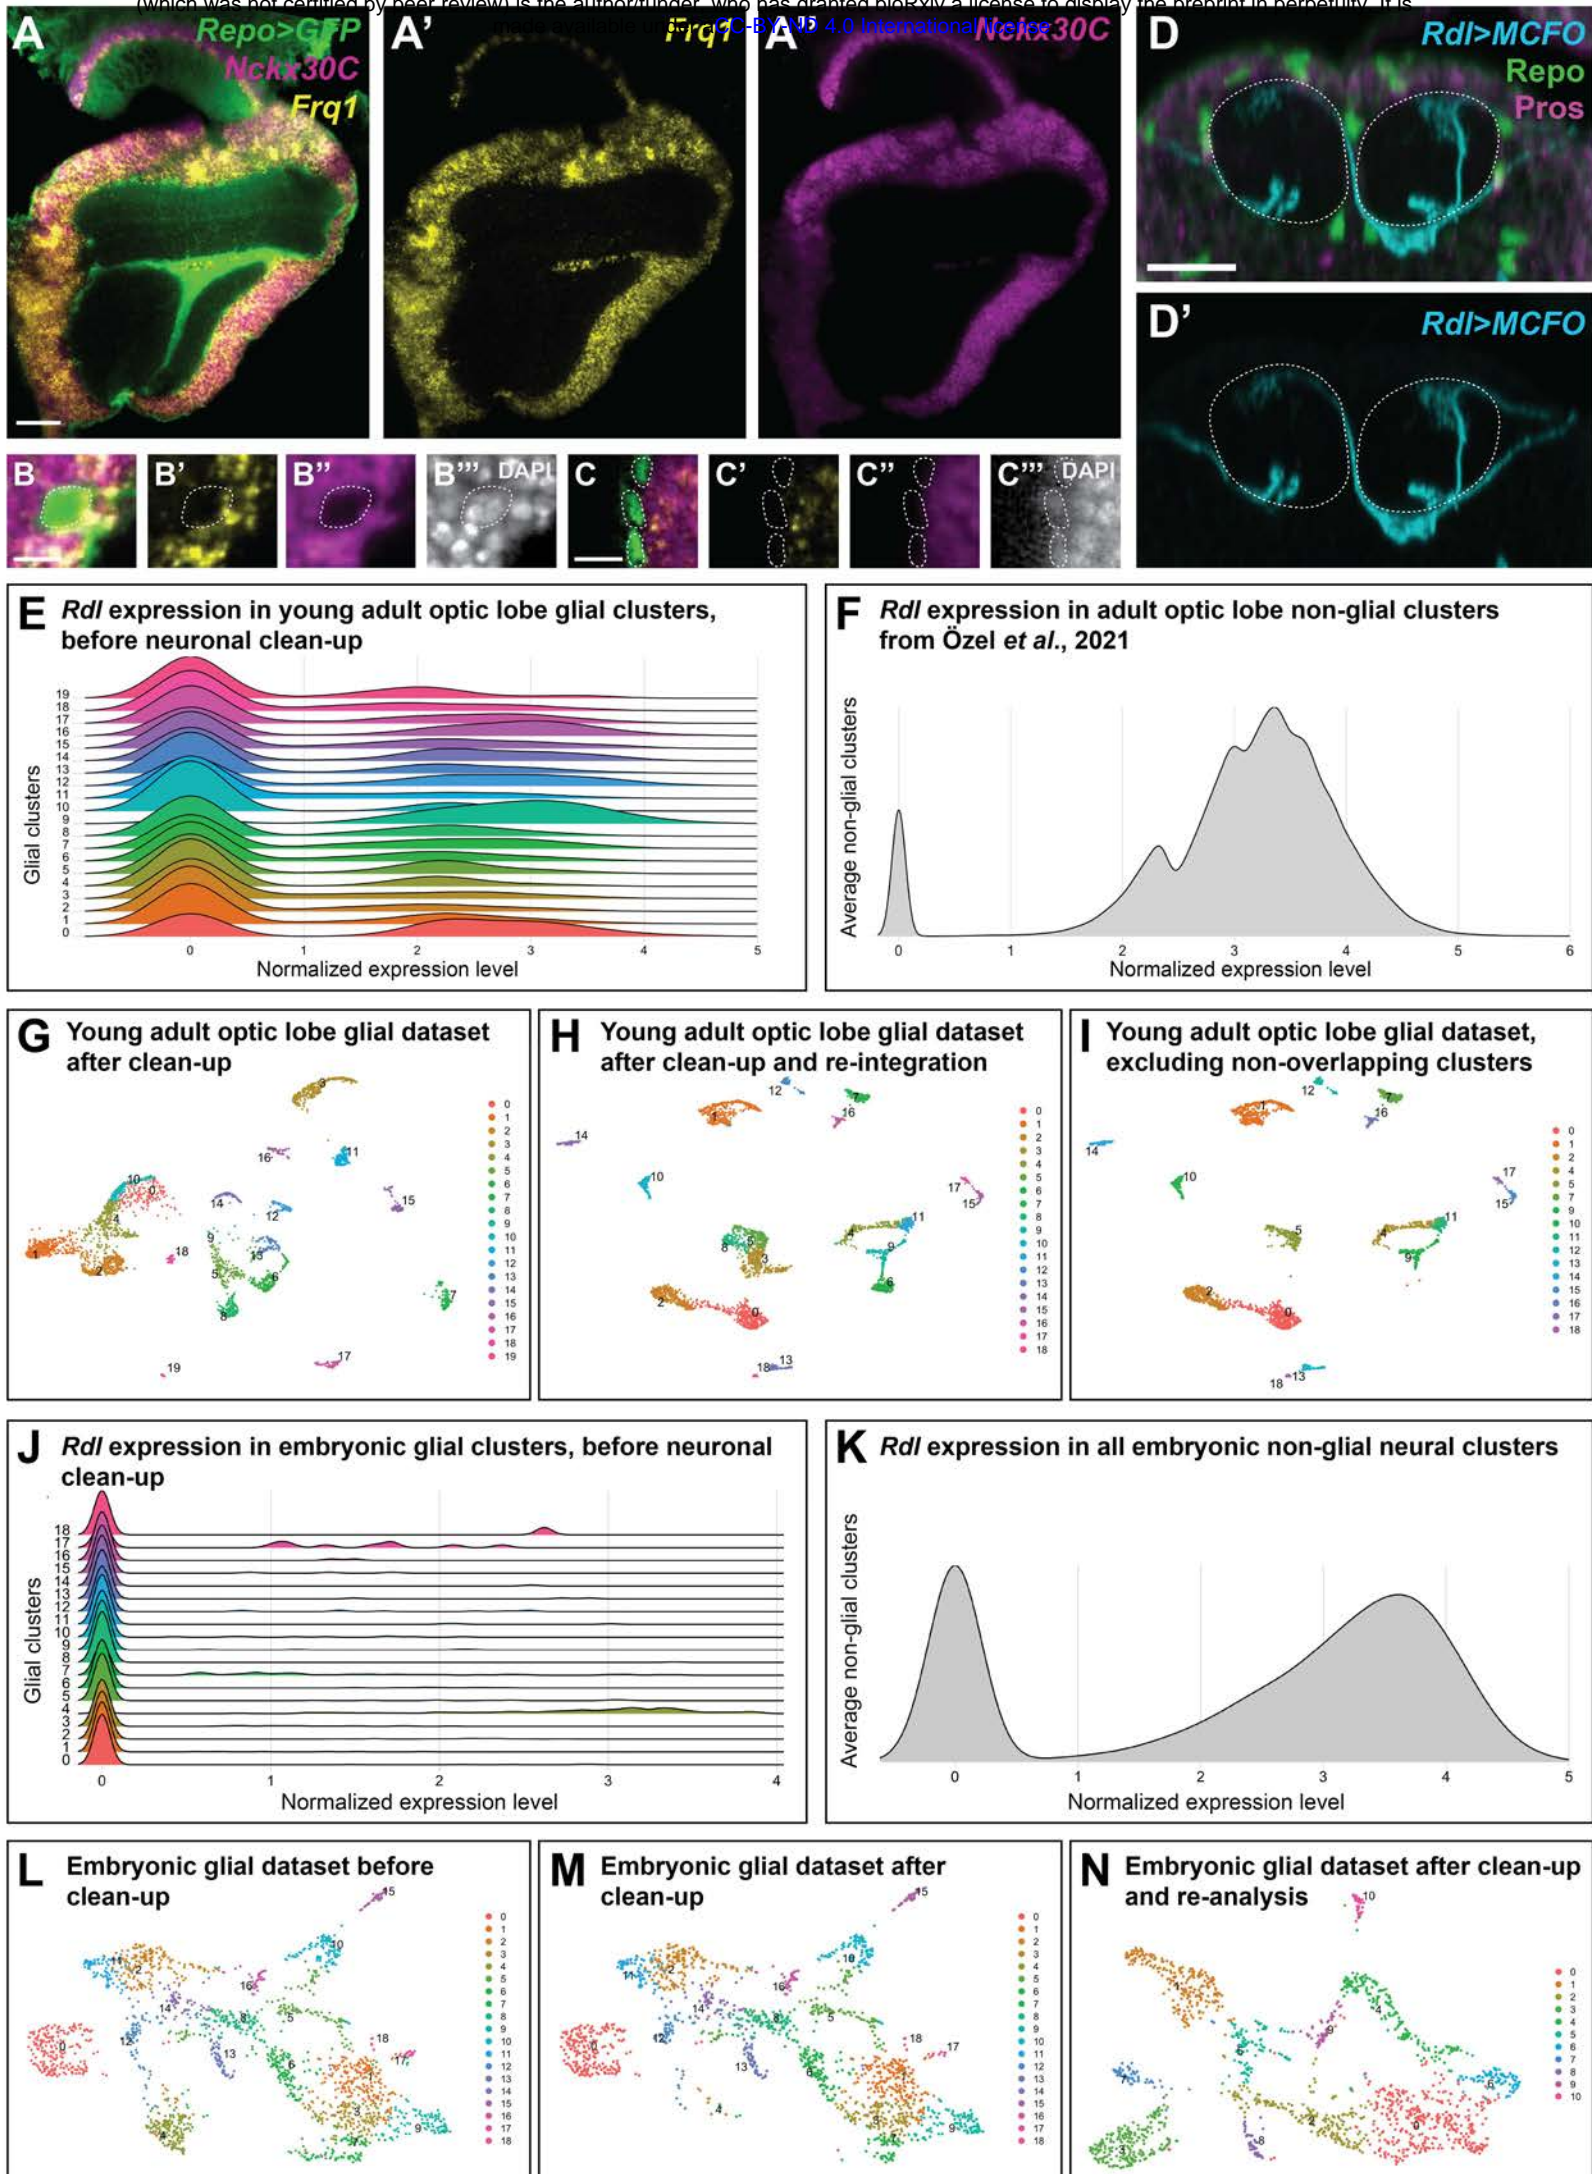

**Figure 3- supplementary figure S3. Clean-up of contamination of glial clusters with cells with typical neuronal profile.**

- (A)** *Frq1* (yellow) and *Nckx30C* (magenta) expression were detected by *in situ* HCR in the cortex area of the optic lobe. GFP labelled all glial cells in green. Single focal plane. Scale bar is 20  $\mu\text{m}$ .
- (B,C)** Single focal planes showing glial somas (green) with *Frq1* (yellow) and *Nckx30C* (magenta) expression. DAPI marks all nuclei in white. Dashed lines outline glial somas. Scale bars are 5  $\mu\text{m}$ .
- (D)** Single focal planes of MCFO clones (cyan) generated with *Rdl-Gal4*. Repo in green and Prospero in magenta. Dashed lines outline the neuropil. Scale bar is 7  $\mu\text{m}$ .
- (E)** The distribution of *Rdl* expression levels in each glial cluster of the young adult optic lobe integrated dataset, before neuronal clean-up.
- (F)** The distribution of *Rdl* expression levels in all cells of the 3-day-old adult optic lobe UMAP, from Özel et al., 2021, except glial clusters.
- (G)** UMAP of the 20 glial clusters obtained from the first integration of optic lobe datasets
- (H)** UMAP of 19 glial clusters after clean-up of potential neurons by excluding cells with normalised expression of *Rdl*, *Frq1* and *Nckx30C*  $>1$ , and cells with *Hml* expression ( $>0$  normalised expression) as potential hemocytes.
- (I)** Cluster #3, #6 and #8 were excluded from the UMAP in (H) since less than 1% of the cells contained in them originated from the Kurmangaliyev et al. (2020) dataset (see Materials and Methods for details).
- (J)** The distribution of *Rdl* expression in each glial cluster of the embryonic dataset, before neuronal clean-up.
- (K)** The distribution of *Rdl* expression in all cells of the embryonic nervous system, excluding cells belonging to the 19 glial clusters.
- (L)** UMAP of the 19 initial glial clusters of the embryonic nervous system, before neuronal clean-up.
- (M)** Same UMAP as in (L) after exclusion of potential neurons (normalised expression  $>1$  of *Rdl*, *Frq1* and *Nckx30C*) and potential hemocytes (normalised expression  $>0$  of *Hml* expression).
- (N)** UMAP of the remaining cells in (M) after reanalysis and reclustering (see Materials and Methods for details).

Figure 4

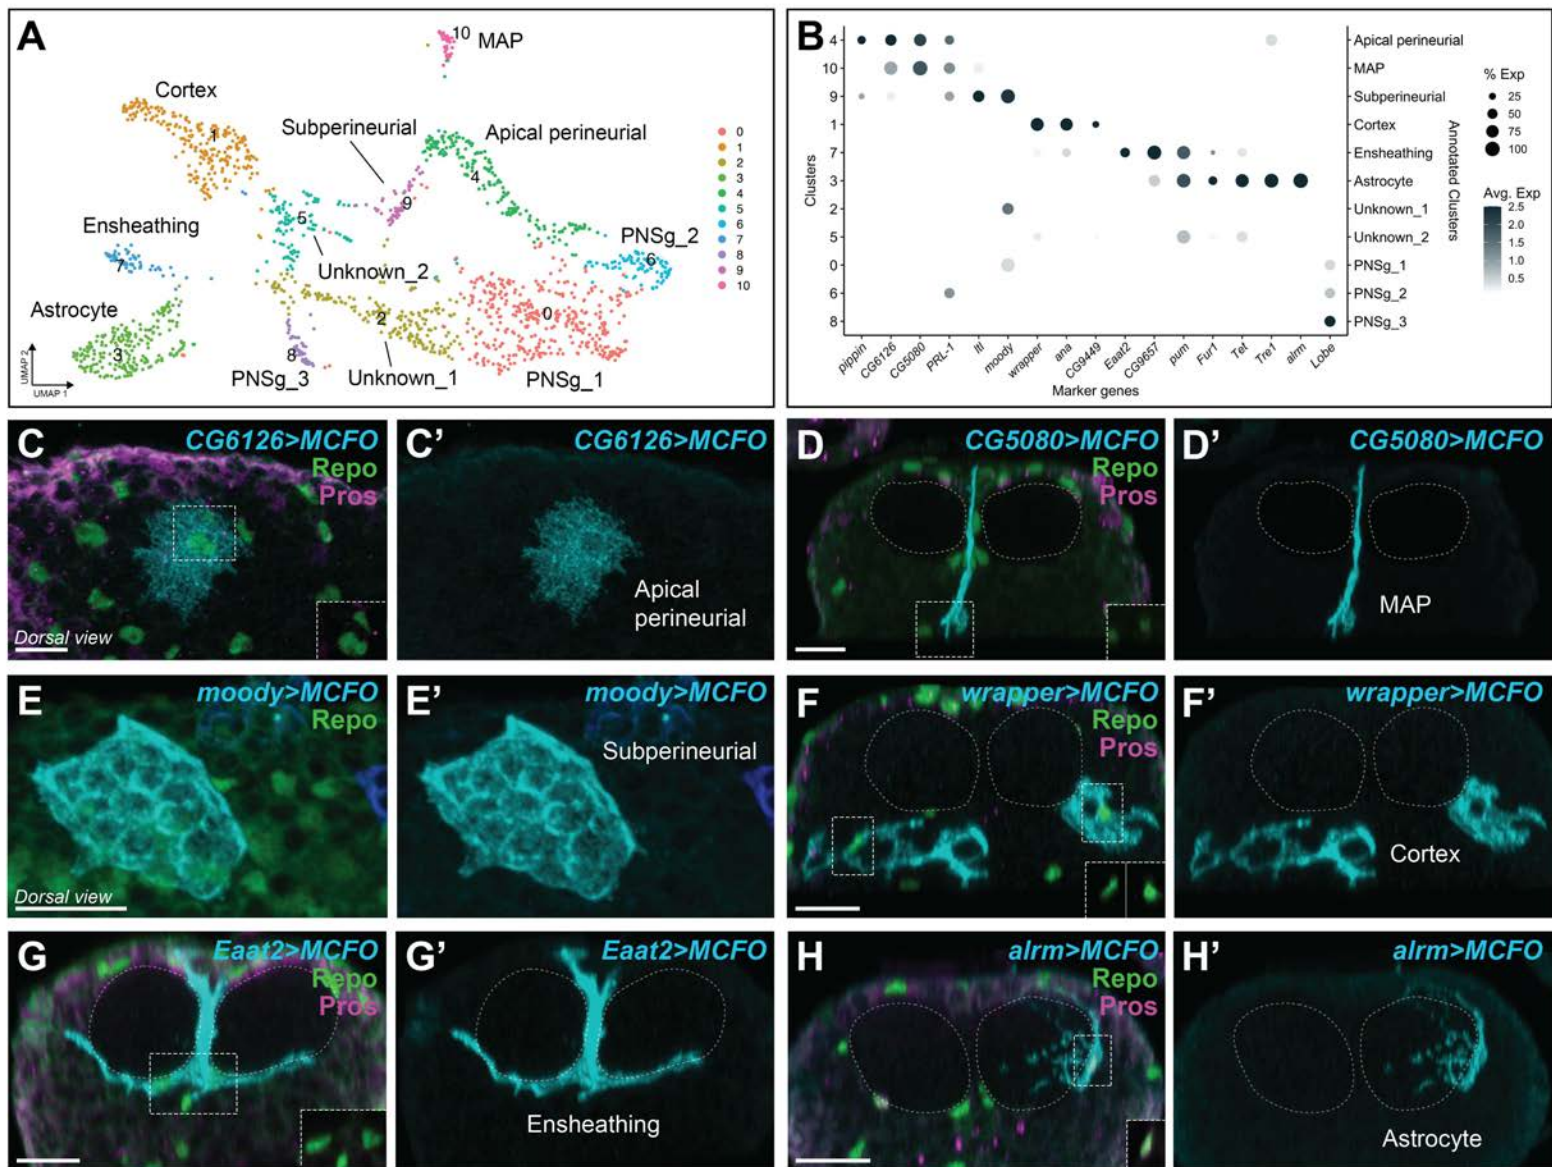

**Figure 4. Annotation of embryonic glial clusters in the VNC.**

**(A)** UMAP of the 11 embryonic glial clusters labelled with both the cluster number (left) and our annotation of the specific glial class (and subtype; right) based on marker gene validation.

**(B)** Expression plot of all marker genes selected for annotation, which were validated *in vivo* (except for *Lobe*). The size of the dot represents the percentage of cells with expression in each cluster, while the colour of the dot represents the level of average expression in the cluster.

**(C-H)** MCFO clones generated with the Gal4 lines indicated belonged to the main embryonic glial subtypes as accessed by their morphology –

**(C)** apical perineurial (N=58 clones from N=6 brains),

**(D)** the newly defined perineurial glial subtype, termed midline-associated perineurial (MAP, present in N=4/7 MCFO brains) glia,

**(E)** subperineurial (N=95 clones from N=12 brains),

**(F)** cortex (N=295 clones from N=13 brains),

**(G)** ensheathing (N=190 clones from N=11 brains),

**(H)** astrocyte (N=115 clones from N=13 brains), and.

All MCFO clones labelled in cyan, with Repo in green and Prospero in magenta. Insets in (C,F-H) show Prospero and Repo in glial nuclei in *alrm>MCFO* clones in (H) were positive for Prospero.

See Figure 4- supplementary figures S1-3 for additional *in vivo* marker gene validation. Dashed lines outline the neuropils. Scale bars are 10  $\mu\text{m}$ .

Figure 4 - FigS1

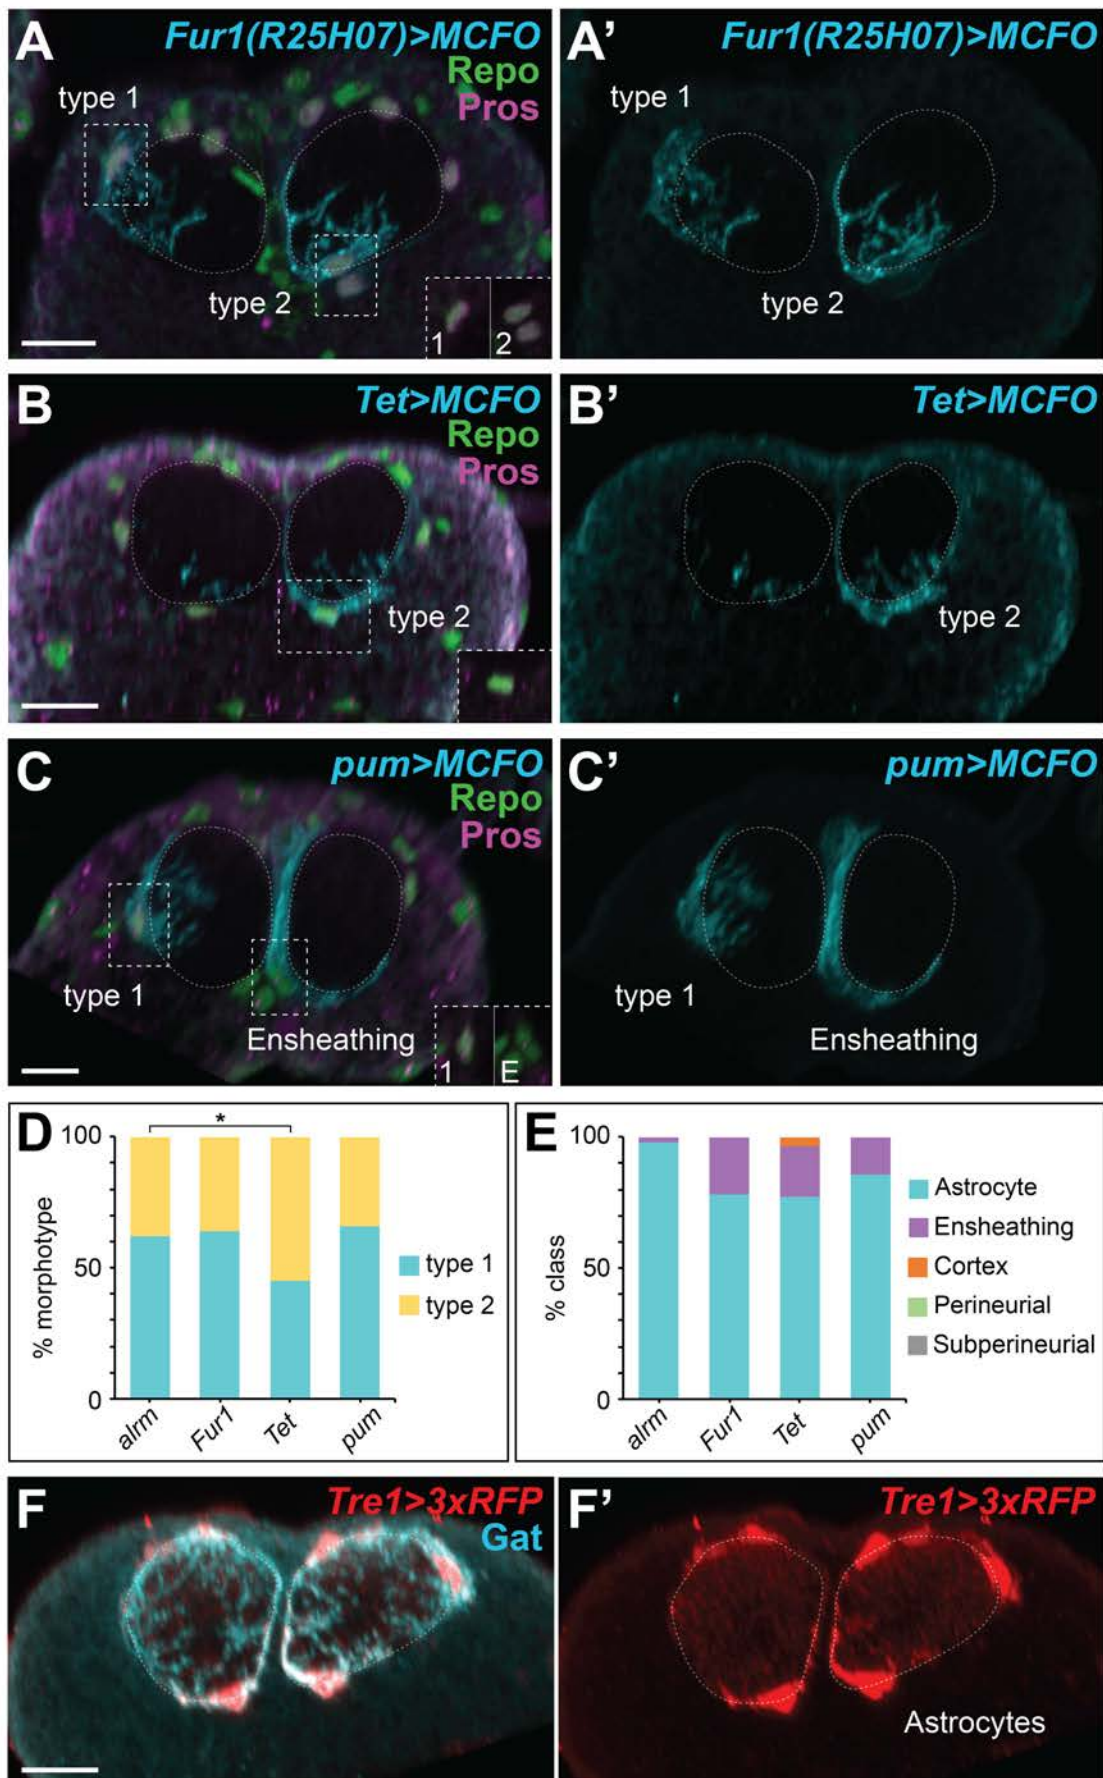

**Figure 4- supplementary figure S1. Validation and analysis of new markers for *Drosophila* VNC astrocytes.**

**(A-C)** MCFO clones (VNC cross sections) at 0 h after larval hatching generated with the Gal4 lines indicated, belonging to marker genes with high expression in the astrocyte cluster: *Fur1* (N=141 clones from N=12 brains), *Tet* (N=71 clones from N=10 brains), and *pum* (N=25 clones from N=9 brains). All MCFO clones labelled in cyan, with Repo in green and Prospero in magenta. Insets in (A-C) show Prospero and Repo in glial nuclei; only astrocyte clones were positive for Prospero. Dashed lines outline the neuropils.

**(D)** Quantification of astrocyte morphotype frequency by driver line. *Tet-Gal4* showed a significant enrichment for type 2 astrocyte clones ( $p < .02$ , Chi-squared analysis).

**(E)** Quantification of the frequency of glial type clone for each indicated driver line.

**(F)** VNC cross section showing colocalization of the astrocyte marker Gat (cyan) and a gene-trap line where 3xRFP has been swapped for the *Tre1* locus (red). Scale bars are 10  $\mu\text{m}$ .

Figure 4 - FigS2

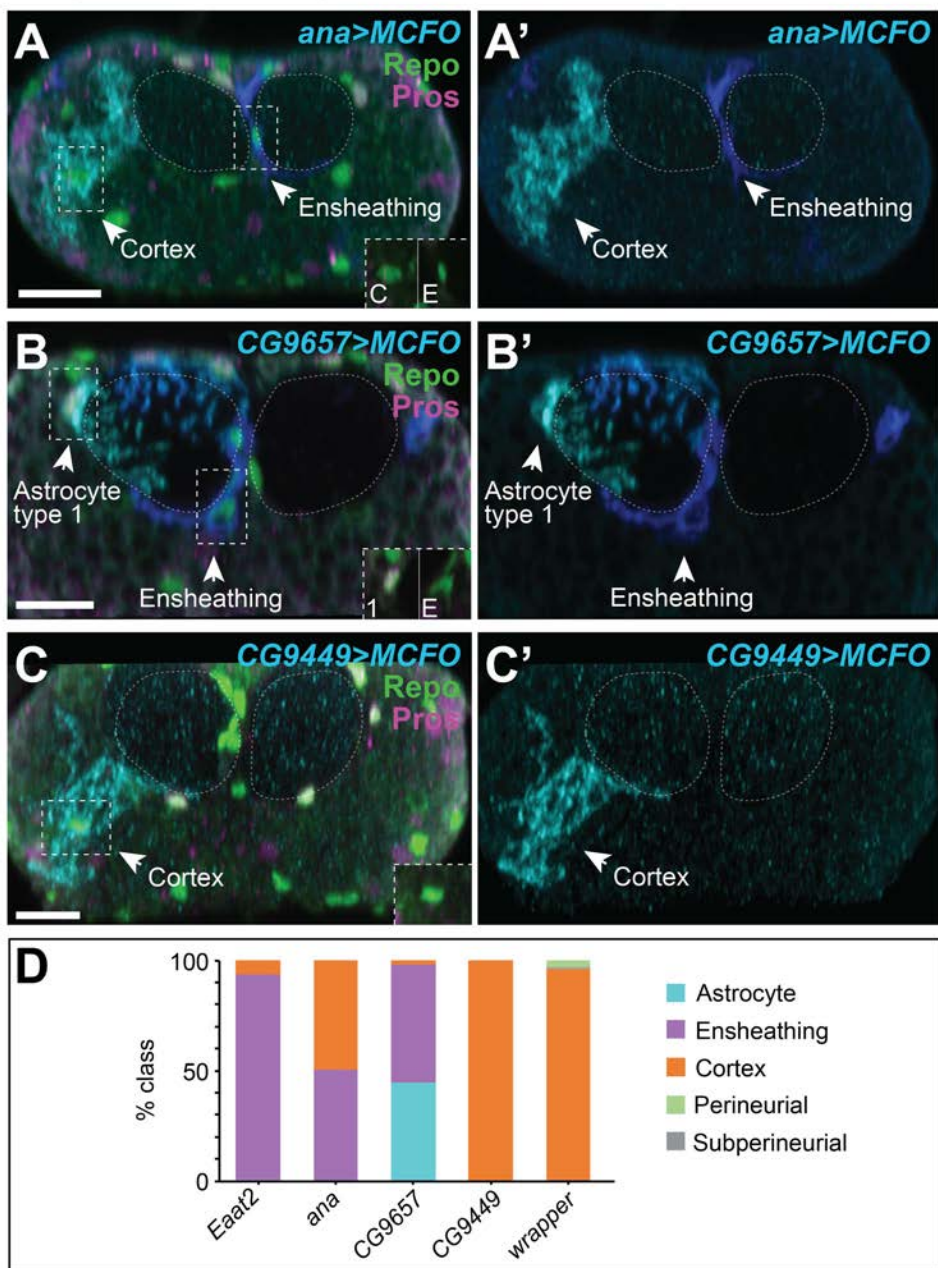



**Figure 4- supplementary figure S2. Validation and analysis of new markers for *Drosophila* VNC ensheathing and cortex glia.**

**(A-C)** MCFO clones (VNC cross sections) at 0 h after larval hatching generated with the Gal4 lines indicated, belonging to marker genes with high expression in the ensheathing or cortex clusters: *ana* (N=388 clones from N=11 brains), *CG9657* (N=287 clones from N=10 brains), and *CG9449* (N=5 clones from N=3 brains).

All MCFO clones labelled in cyan, with Repo in green and Prospero in magenta. Insets in (A,B,C) show Prospero and Repo in glial nuclei, where only astrocyte clones were positive for Prospero. Dashed lines outline the neuropils.

**(D)** Quantification of the frequency of glial type clone for each indicated driver line.

Scale bars are 10  $\mu\text{m}$ .

Figure 4 - FigS3

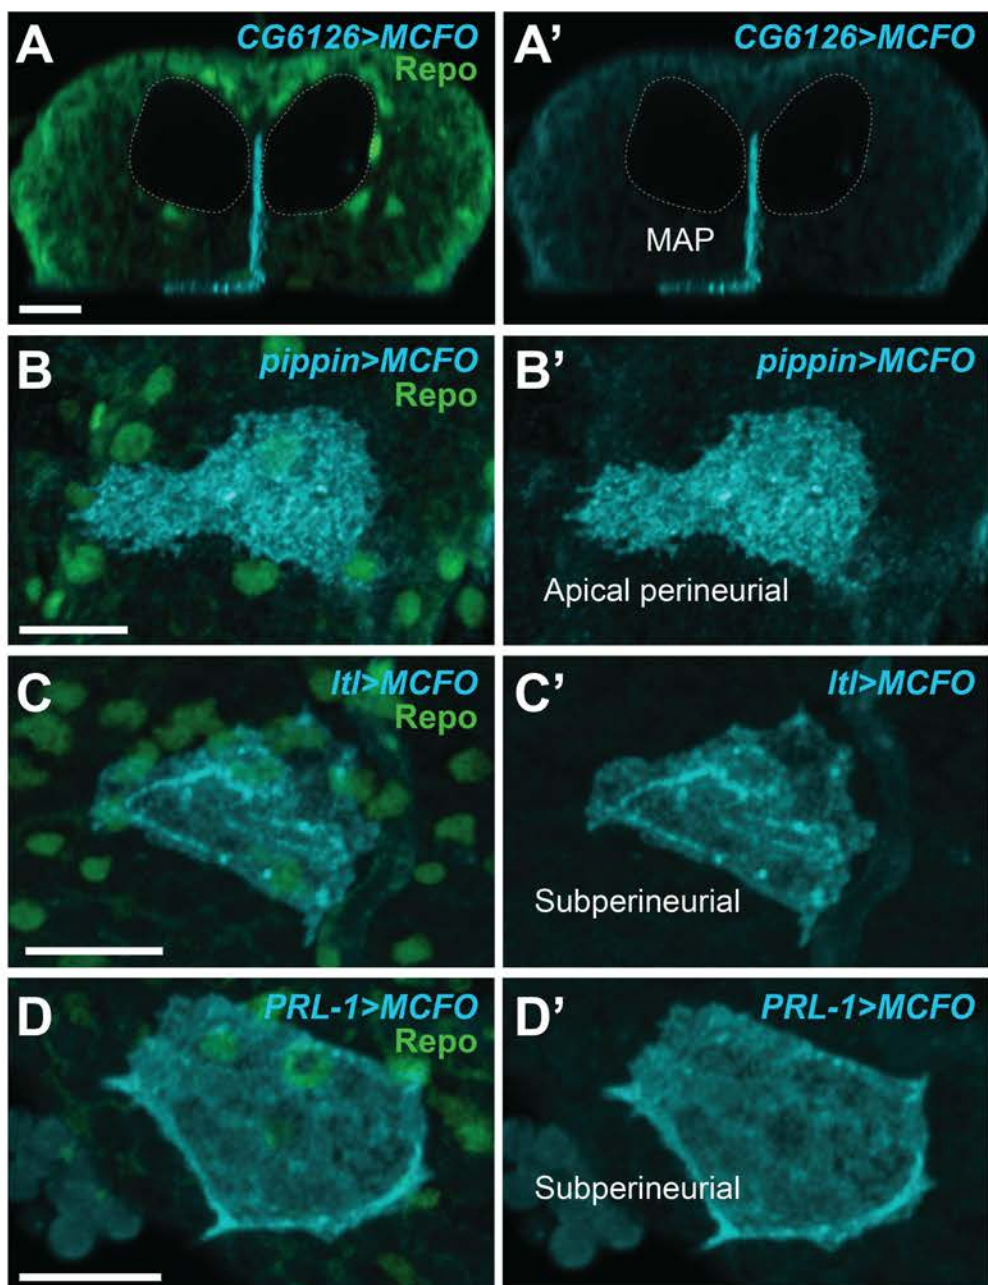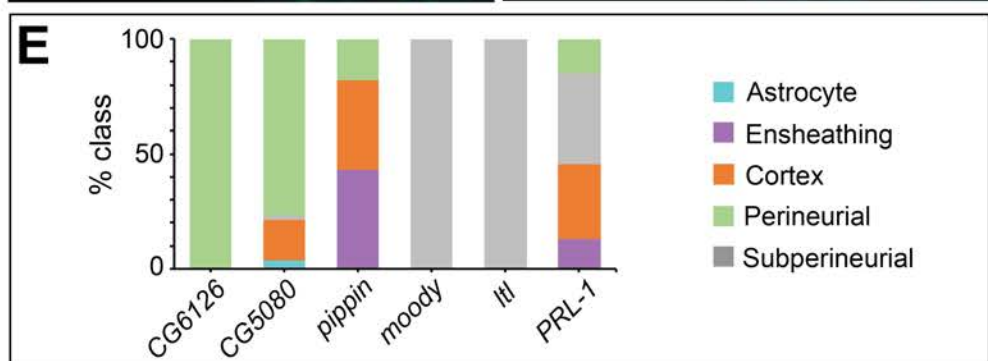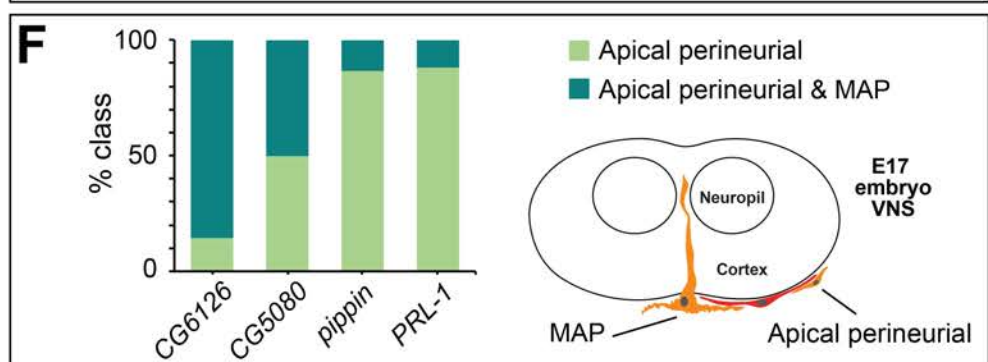

**Figure 4- supplementary figure S3. Validation and analysis of new markers for *Drosophila* VNC surface glia.**

**(A-D)** MCFO clones (dorsal or ventral surface views) at 0 h after larval hatching generated with the Gal4 lines indicated, belonging to marker genes with high expression in the surface glia clusters: *CG5080* (N=134 clones from N=7 brains), *pippin* (N=290 clones from N=14 brains), *ItI* (N=19 clones from N=7 brains) and *PRL-1* (N=154 clones from N=17 brains). All MCFO clones labelled in cyan, with Repo in green.

**(E)** Quantification of the frequency of clones recovered by glial class for the indicated driver.

**(F)** Quantification of perineurial glia morphotype frequency by driver line. MAP glia were detected in 85% of *CG6126* MCFO brains (n=7 brains total) and 57% of *CG5080* brains (N=7 brains total), compared to 13% of *pippin* MCFO brains (N=15 brains total) and 11% of *PRL-1* MCFO brains (N=17 brains total). Scale bars are 10  $\mu$ m.

# Figure 5

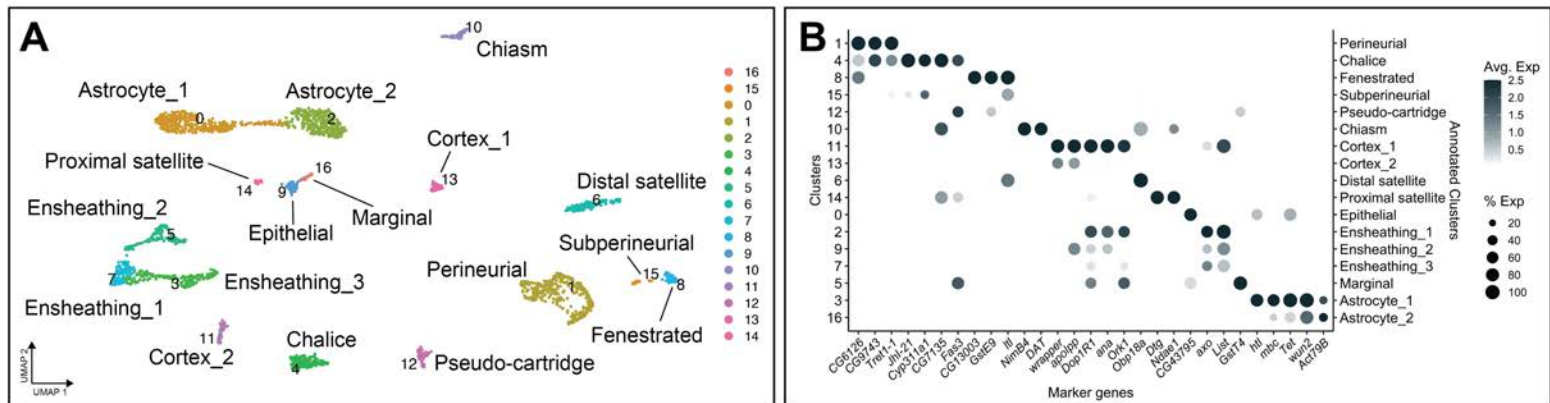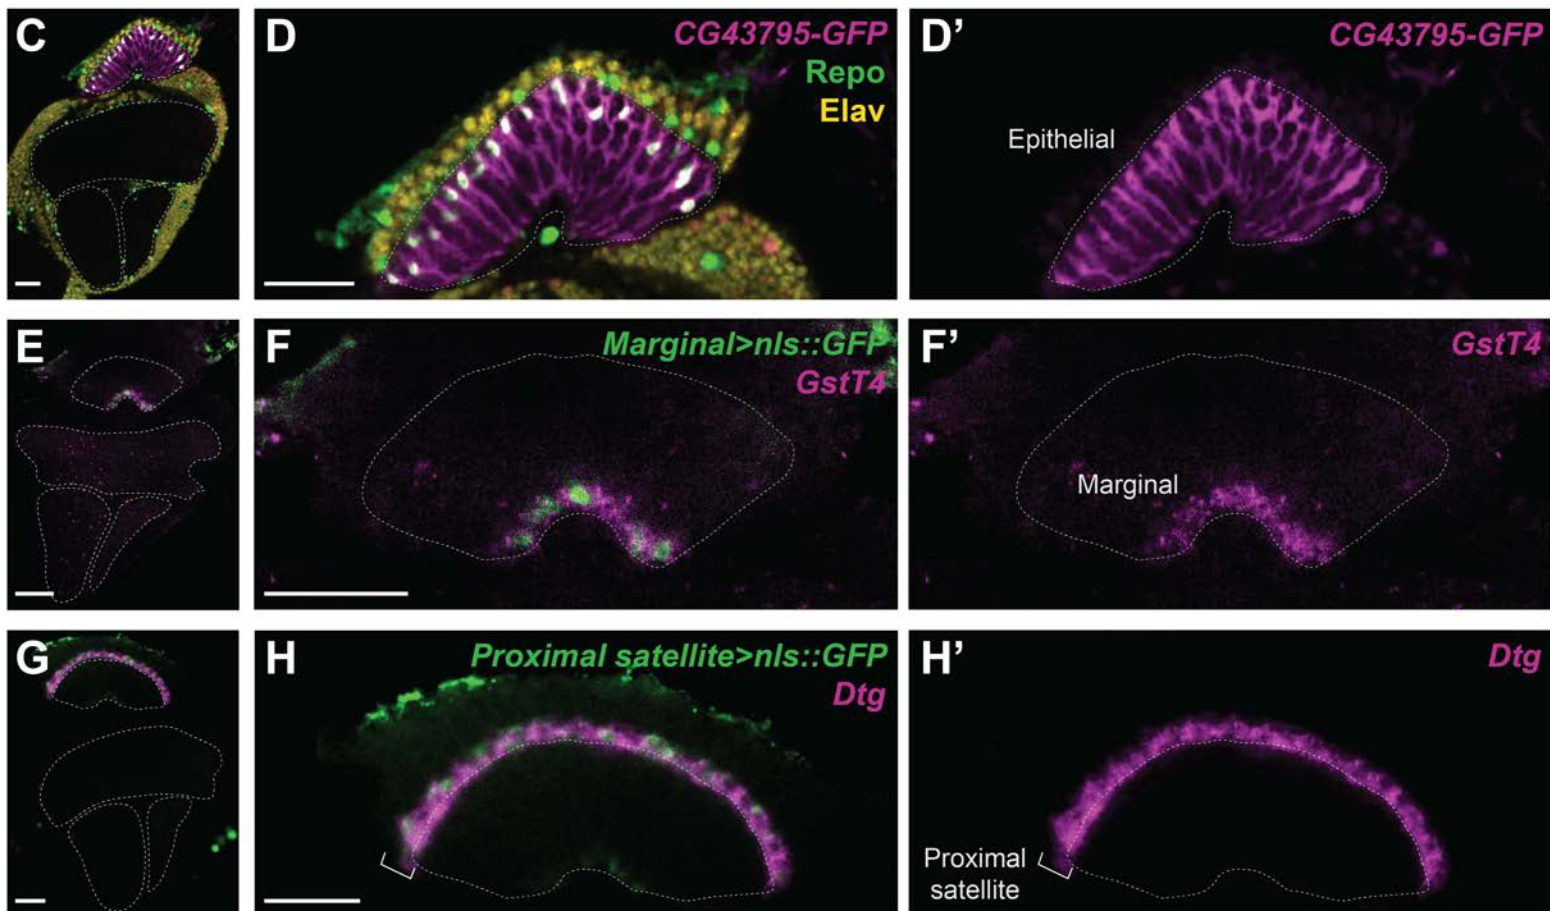

### Figure 5. Annotation of young adult optic lobe glial clusters

**(A)** UMAP of the 17 clusters obtained for the young adult optic lobe dataset, labelled with both the cluster number (left) and our annotation of the specific glial class based on marker gene expression validated *in vivo* (right).

**(B)** Expression plot of all marker genes selected for annotation and validated *in vivo*. The size of the dot represents the percentage of cells with expression in each cluster, while the colour of the dot represents the level of average expression in the cluster.

**(C-H)** Three examples of marker gene validation for the whole optic lobe, focussed on the lamina:

**(C,D)** *CG43795* gene trap drove GFP expression (magenta) in epithelial glia specifically. Repo in green and Elav in yellow.

**(E, F)** *GstT4* and **(G, H)** *Dtg* (both in magenta) expression were detected by *in situ* HCR in marginal and proximal satellite glia, respectively. GFP was driven by the indicated glial-Gal4 in green.

See Figure 5- supplementary figures S1-4 for additional *in vivo* marker gene validation. Dashed lines outline the neuropils. Single focal planes in (C-H). Scale bars are 20  $\mu\text{m}$  in (C,E,G) and 5  $\mu\text{m}$  in (D,F,H).

# Figure 5 - FigS1

bioRxiv preprint doi: <https://doi.org/10.1101/2022.08.01.502305>; this version posted August 3, 2022. The copyright holder for this preprint (which was not certified by peer review) is the author/funder, who has granted bioRxiv a license to display the preprint in perpetuity. It is made available under aCC-BY-ND 4.0 International license.

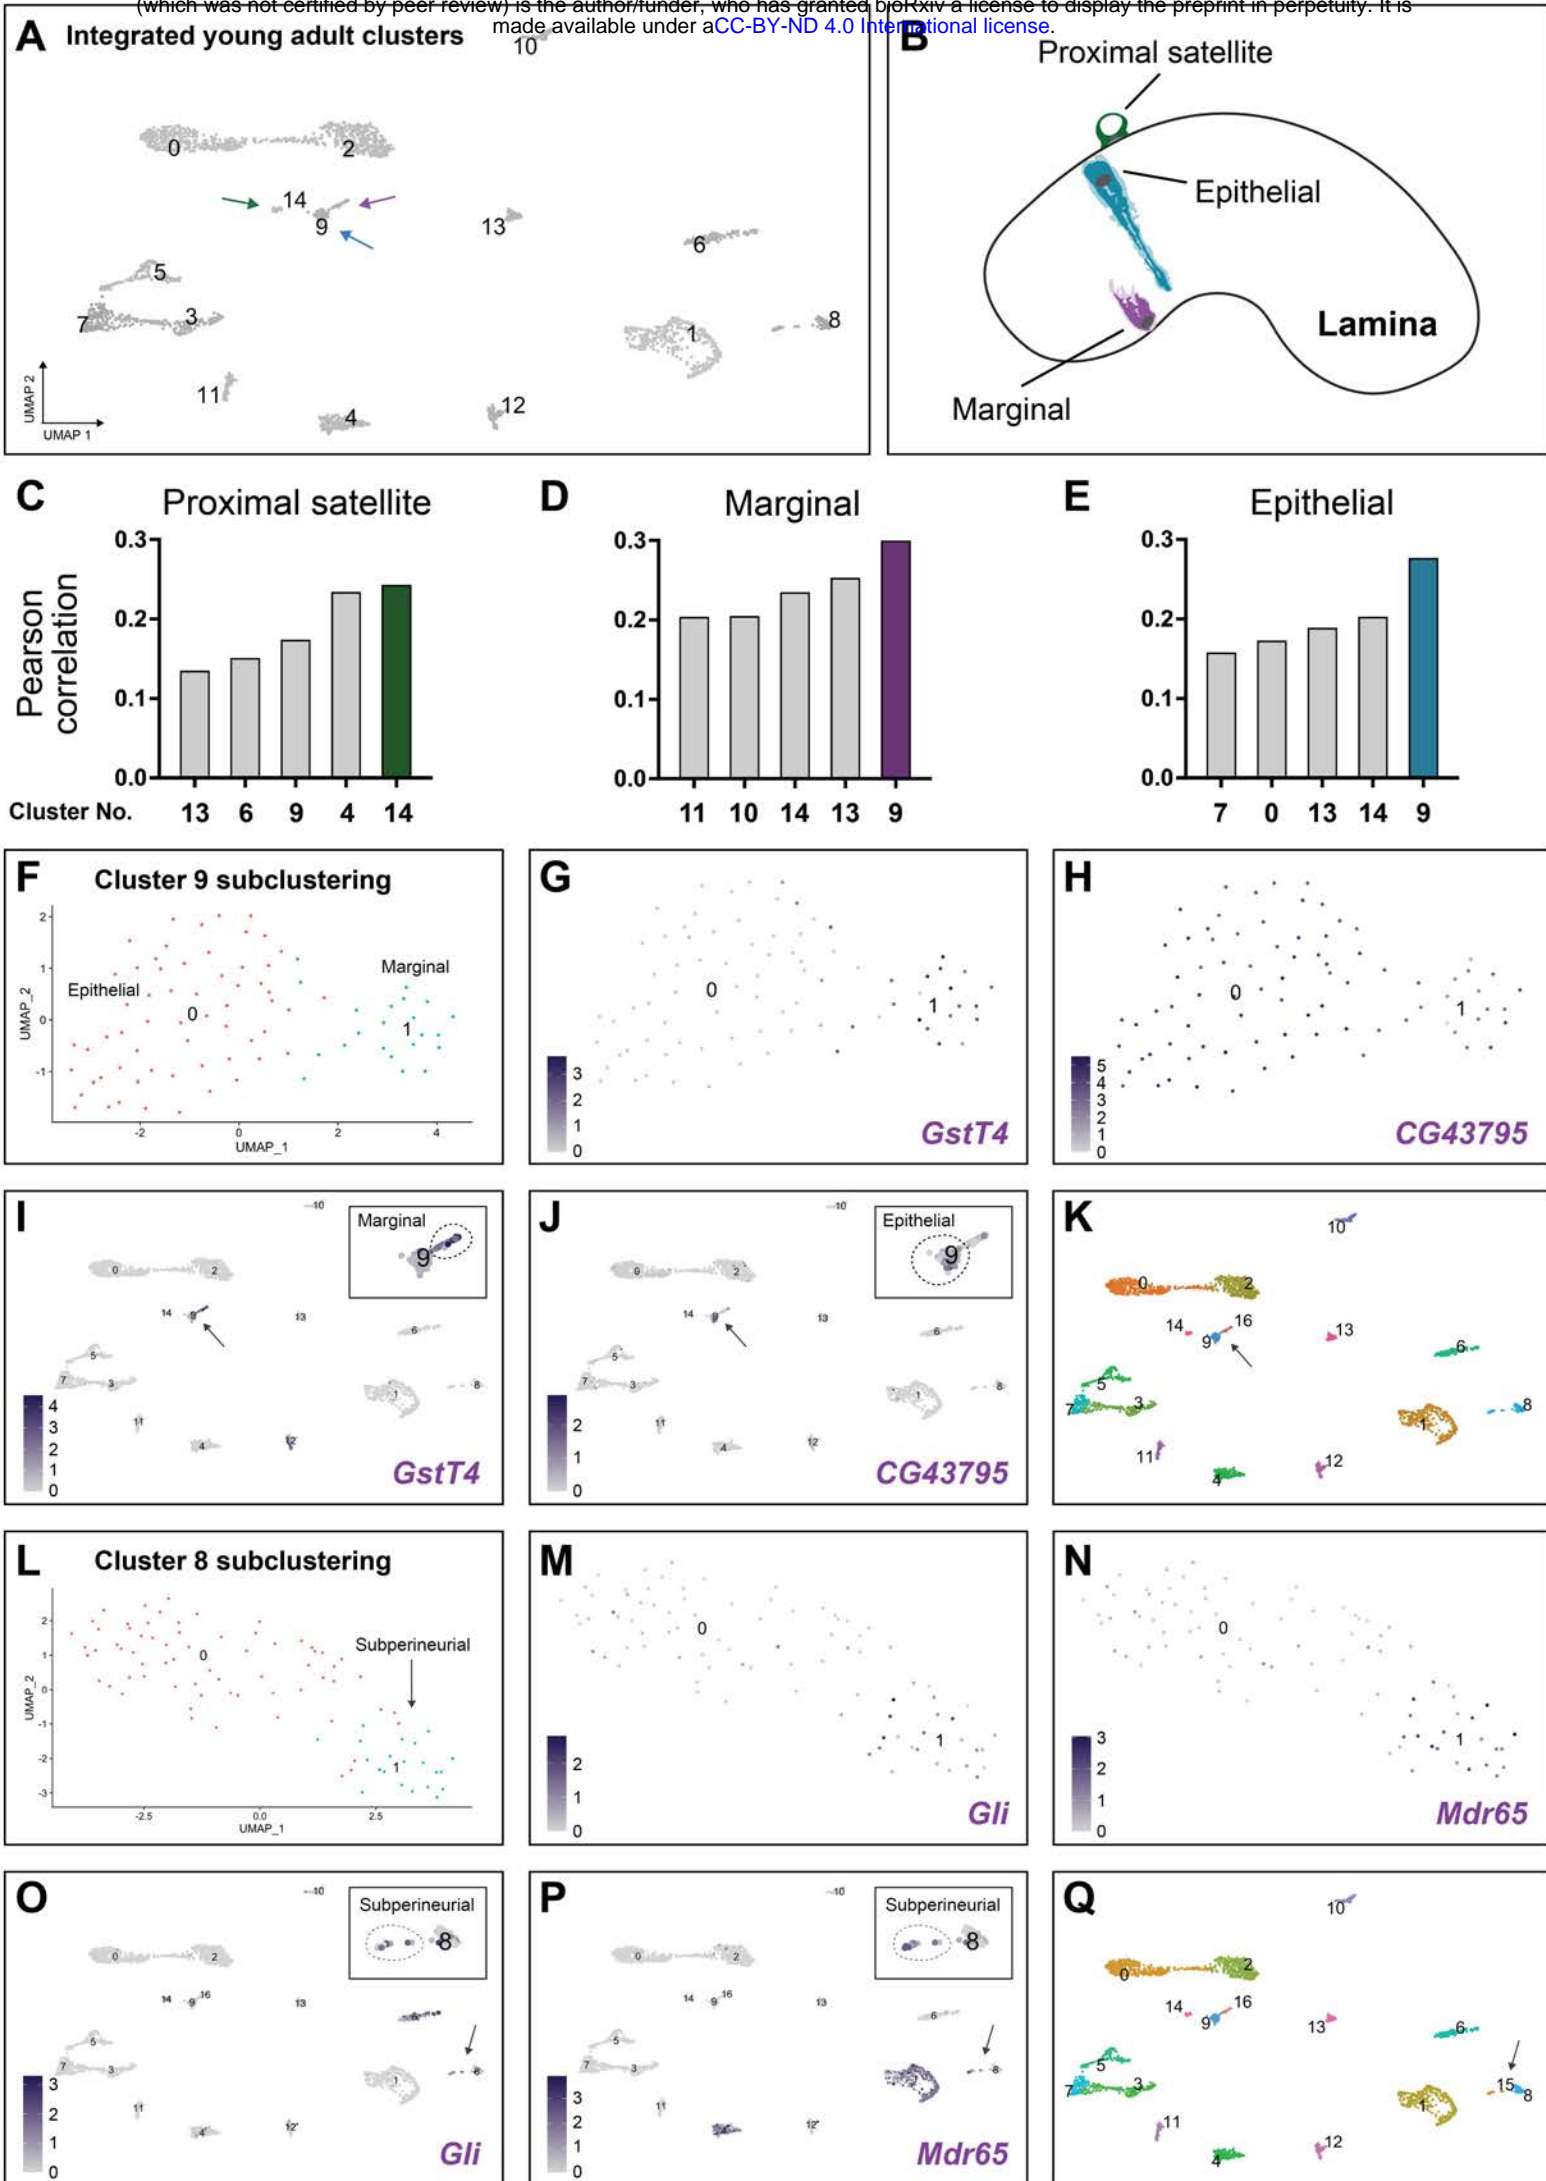

**Figure 5- supplementary figure S1. Subclustering of young adult optic lobe glial clusters to find hidden rare subtypes.**

**(A)** UMAP of the 15 glial clusters of the integrated young adult dataset.

**(B)** Schematic of the adult optic lobe lamina with marginal, epithelial and proximal satellite glia represented.

**(C-E)** Pearson correlation values between the bulk-RNA-seq transcriptomes of the proximal satellite, marginal and epithelial glia and the top five glial cluster matches from the young adult dataset.

**(F)** Subclustering of cluster #9 generated two subclusters.

**(G)** *GstT4* (a gene highly expressed marginal glia bulk RNA-seq data) showed high expression in subcluster #1.

**(H)** *CG43795* (a gene highly expressed in epithelial glia bulk RNA-seq) showed high expression in subcluster #0.

**(I,J)** Expression of *GstT4* (I) and *CG43795* (J) in the UMAP of the 15 glial clusters of the integrated young adult dataset. Both genes showed mutually exclusive expression patterns within cluster #9.

**(K)** UMAP showing the original cluster #9 split into new clusters #9 and #16 (see Materials and Methods).

**(L)** Subclustering cluster #8 generated two subclusters.

**(M,N)** *Gli* (*Gliotactin*) and *Mdr65* (*Multi drug resistance 65*), both known markers of subperineurial glia (Mayer et al., 2009), were expressed in subcluster #1.

**(O,P)** Expression of *Gli* and *Mdr65* on the UMAP of the 16 glial clusters of the integrated young adult dataset. Both genes showed overlapped expression in a group of cells belonging to cluster #8.

**(Q)** UMAP showing the original cluster #8 split into new clusters #8 and #15 (see Materials and Methods).

# Figure 5 - TableS1

| Cluster         | Glial class                       | Dimensions | Resolution | No. subclusters | No. DEG (>1.5 FC) | No. DEG (>2 FC) | No. DEG (>3 FC) | No. DEG (>4 FC) |
|-----------------|-----------------------------------|------------|------------|-----------------|-------------------|-----------------|-----------------|-----------------|
| 0               | Astrocyte_1                       | 9          | 0.3        | 3               | 123               | 16              | 2               | 1               |
| 1               | Perineurial                       | 11         | 0.4        | 3               | 197               | 52              | 6               | 3               |
| 2               | Astrocyte_2                       | 7          | 0.3        | 3               | 123               | 17              | 0               | 0               |
| 3               | Ensheathing_3                     | 11         | 0.5        | 3               | 320               | 86              | 11              | 2               |
| 4               | Chalice                           | 12         | 0.5        | 2               | 95                | 24              | 3               | 0               |
| 5               | Ensheathing_2                     | 10         | 0.5        | 3               | 339               | 121             | 35              | 14              |
| 6               | Distal satellite                  | 11         | 0.5        | 3               | 238               | 61              | 17              | 9               |
| 7               | Ensheathing_1                     | 11         | 0.5        | 2               | 105               | 24              | 3               | 1               |
| <b>8 (8+15)</b> | <b>Fenestrated+Subperineurial</b> | <b>3</b>   | <b>0.2</b> | <b>2</b>        | <b>419</b>        | <b>228</b>      | <b>83</b>       | <b>42</b>       |
| 8               | Fenestrated                       | 12         | 0.9        | 2               | 102               | 19              | 4               | 2               |
| <b>9 (9+16)</b> | <b>Epithelial+Marginal</b>        | <b>5</b>   | <b>0.5</b> | <b>2</b>        | <b>225</b>        | <b>104</b>      | <b>47</b>       | <b>22</b>       |
| 9               | Epithelial                        | 9          | 0.8        | 2               | 55                | 4               | 0               | 0               |
| 10              | Chiasm                            | 10         | 0.8        | 2               | 146               | 27              | 5               | 2               |
| 11              | Cortex_2                          | -          |            |                 |                   |                 |                 |                 |
| 12              | Pseudo-cartridge                  | -          |            |                 |                   |                 |                 |                 |
| 13              | Cortex_1                          | 11         | 0.9        | 2               | 228               | 55              | 4               | 0               |
| 14              | Proximal satellite                | -          |            |                 |                   |                 |                 |                 |
| 15              | Subperineurial                    | -          |            |                 |                   |                 |                 |                 |
| 16              | Marginal                          | -          |            |                 |                   |                 |                 |                 |



**Figure 5- supplementary Table S1. Table S2: Summary of the number of differentially expressed genes (DEGs) obtained for different fold-change (FC) cutoffs between subclusters within each of the 15 glial clusters obtained after cleaning up the young adult glial dataset.**

Figure 5 - FigS2

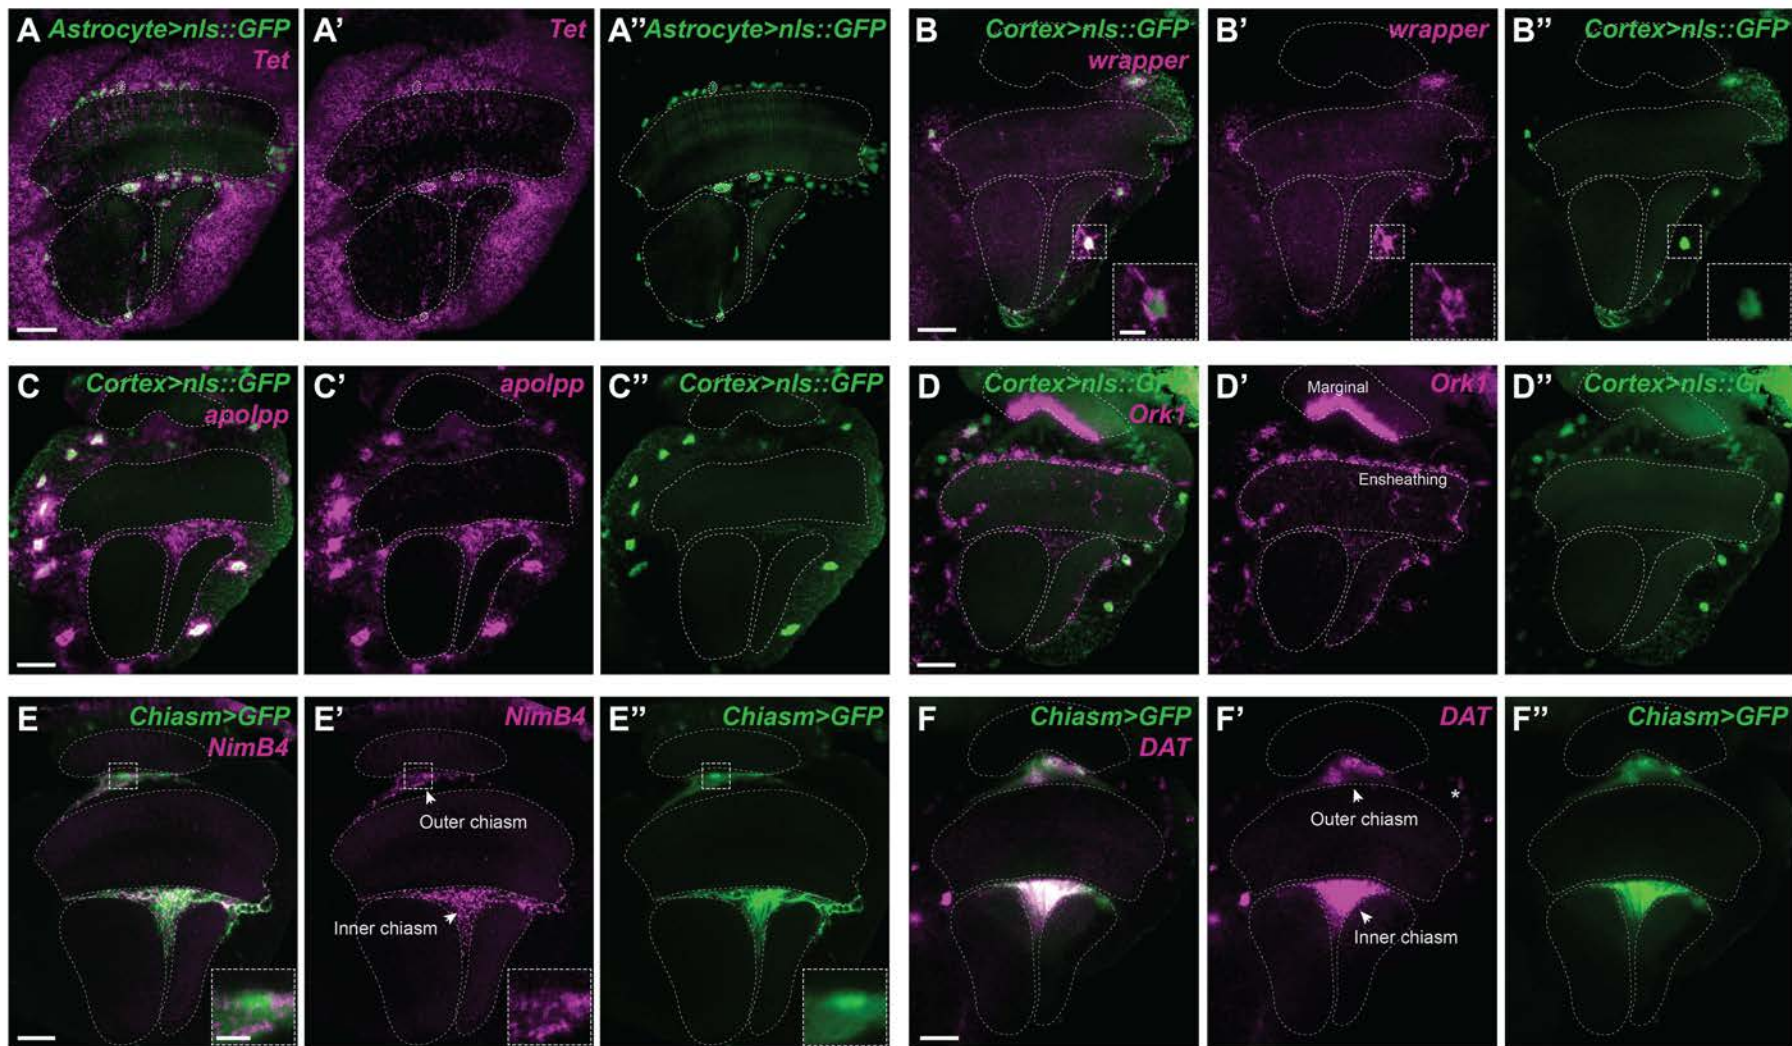

**Figure 5- supplementary figure S2. Validation of marker genes for astrocyte, cortex and chiasm glia of the young adult optic lobe.**

**(A)** *Astrocyte(R86E01)>nls::GFP* adult optic lobe where *Tet* (*Ten-Eleven Translocation (TET) family protein*) expression (magenta) was detected by *in situ* HCR throughout the cortex, including in many GFP positive astrocyte (green) nuclei (outlined by thicker dashed lines). See Figure 5 and 6 for additional *in vivo* astrocyte marker gene validation.

**(B)** *Cortex(R54H02)>nls::GFP* adult optic lobe where *wrapper* expression (magenta) was detected by *in situ* HCR in many GFP positive cortex glia (green) nuclei. Inset of zoomed in nuclei (scale bar is 5  $\mu\text{m}$ ).

**(C)** *Cortex(R54H02)>nls::GFP* adult optic lobe where *apolpp* (*apolipoporphin*) expression (magenta) was detected by *in situ* HCR in most GFP positive (green) nuclei. A few nuclei adjacent to the neuropil were also positive (likely ensheathing glia based on the scRNA-seq data).

**(D)** *Cortex(R54H02)>nls::GFP* adult optic lobe where *Ork1* (*Open rectifier K+ channel 1*) expression (magenta) was detected by *in situ* HCR in some GFP positive cortex glia (green) nuclei. Many nuclei adjacent to the neuropil were also positive (likely ensheathing glia based on the scRNA-seq data), as well as in marginal glia.

**(E)** *Chiasm(R53H12)>GFP* adult optic lobe where *NimB4* (*Nimrod B4*) expression (magenta) was detected by *in situ* HCR in most GFP positive chiasm glia (green) nuclei. Inset of zoomed in nuclei (scale bar is 5  $\mu\text{m}$ ).

**(F)** *Chiasm(R53H12)>GFP* adult optic lobe where *DAT* (*Dopamine transporter*) expression (magenta) was detected by *in situ* HCR in most GFP positive chiasm glia (green) nuclei. Some nuclei in the cortex region around the medulla were positive for *DAT* (asterisk), consistent neuronal expression in the scRNA-seq data from Özel et al., 2021. Single focal planes in (A,E,F) and maximum projections of 11-12 focal planes (1  $\mu\text{m}$  each) in (B-D). Dashed lines outline the neuropils and scale bars are 20  $\mu\text{m}$ .

Figure 5 - FigS3

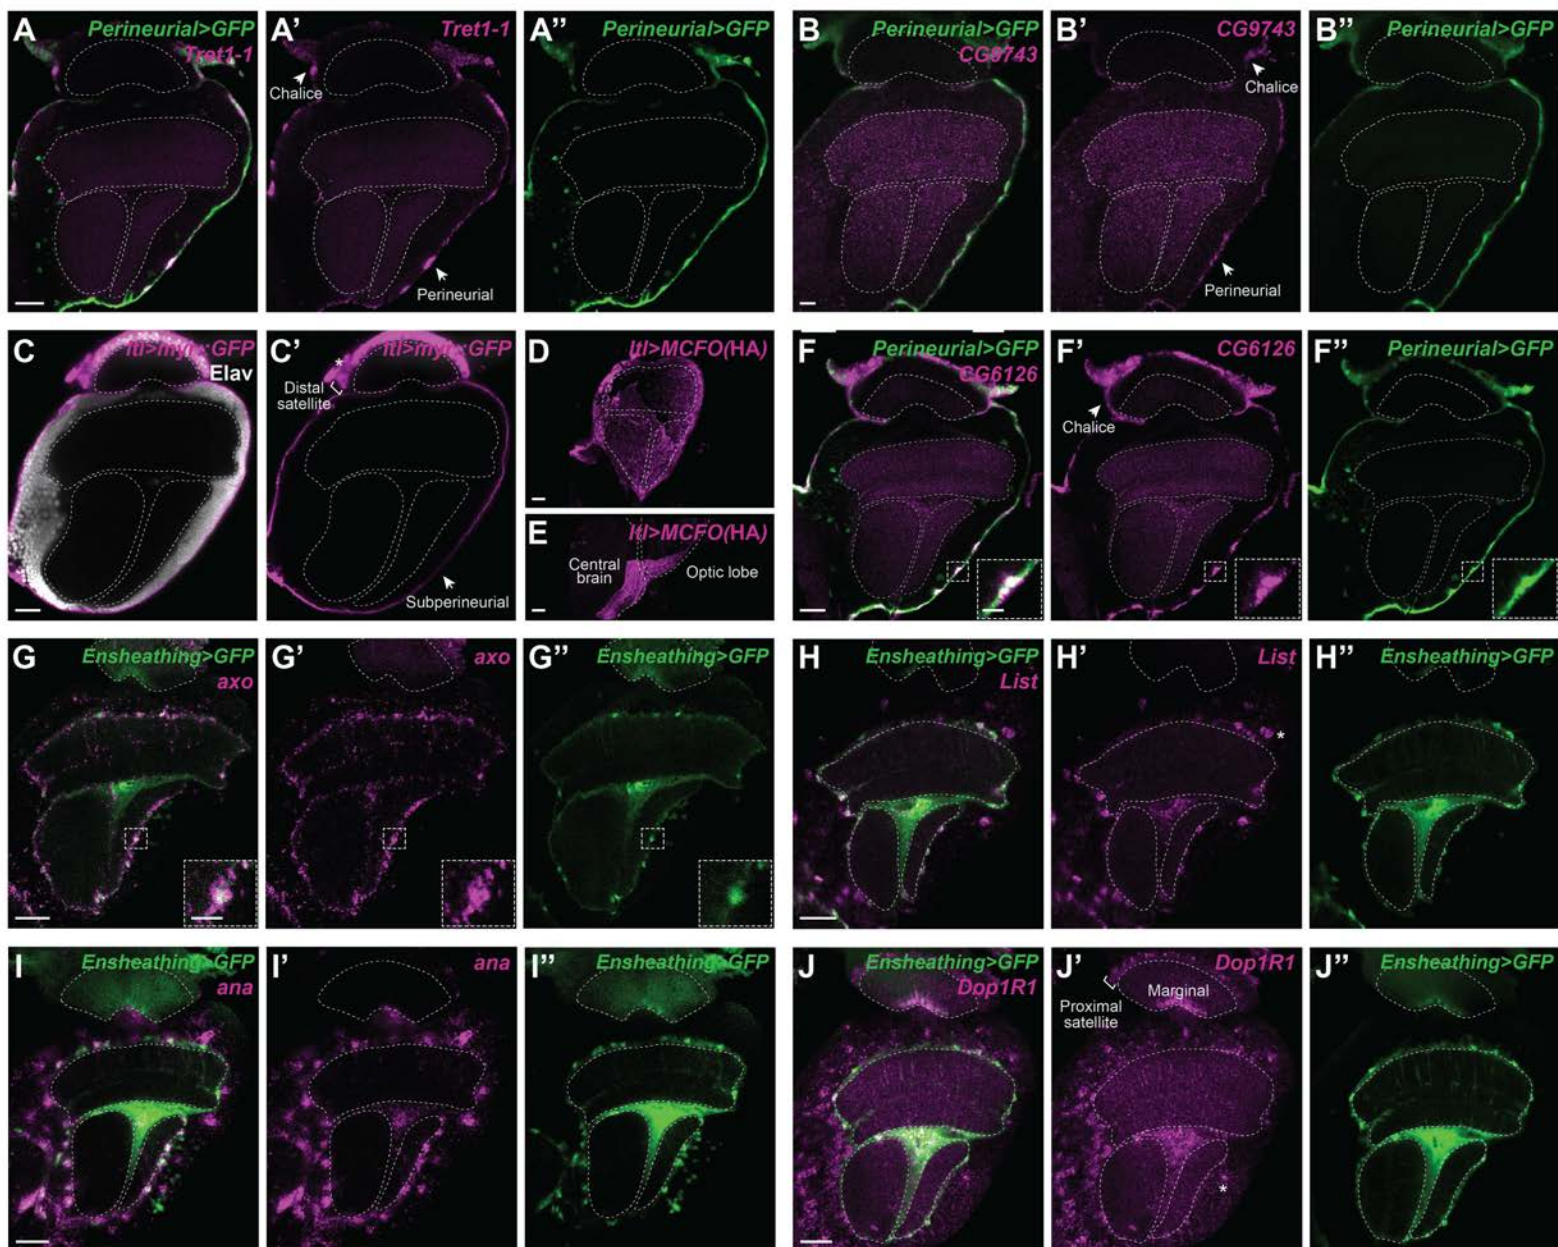

**Figure 5- supplementary figure S3. Validation of marker genes for surface and ensheathing glia of the young adult optic lobe.**

**(A,B)** *Perineurial(R85G01)>GFP* adult optic lobe where **(A)** *Tret1-1* (*Trehalose transporter 1-1*) and **(B)** *CG9743* expression (magenta) was detected by *in situ* HCR. For both genes, most GFP positive (green) nuclei of the general perineurial glia (surrounding the medulla, lobula and lobula plate) were positive, in addition to the chalice glia (as predicted by the scRNA-seq data). *Tret1-1* was shown to be expressed in perineurial glia (Volkenhoff et al., 2015).

**(C)** Adult optic lobes expressing myrGFP driven by *Itl(larval translucida)-Gal4*, gene trap Trojan line, showing *Itl* expression in general surface glia (arrow), distal satellite (bar), and lamina surface (asterisk; fenestrated glia as predicted by the scRNA-seq data).

**(D,E)** Maximum projection of *Itl-Gal4* labelled MCFO clones showing subperineurial morphology (see Figure 2).

**(F)** *Perineurial(R85G01)>GFP* adult optic lobe where *CG6126* expression (magenta) was detected by *in situ* HCR. Most GFP positive (green) nuclei of the general perineurial glia were positive, in addition to the chalice and fenestrated glia, as predicted by the scRNA-seq data.

**(G)** *Ensheathing(R56F03)>GFP* adult optic lobe where *axo* (axotactin) expression (magenta) was detected by *in situ* HCR in most GFP positive (green) nuclei adjacent to the medulla, lobula and lobula plate neuropils. Inset of zoomed-in nuclei (scale bar is 5  $\mu$ m).

**(H)** *Ensheathing(R56F03)>GFP* adult optic lobe where *List* expression (magenta) was detected by *in situ* HCR in most GFP positive (green) nuclei adjacent to the medulla, lobula and lobula plate neuropils, and in some GFP negative nuclei in the cortex area of the same neuropils (asterisk) (general cortex glia as predicted by the scRNA-seq data).

**(I)** *Ensheathing(R56F03)>GFP* adult optic lobe where *ana* (*anachronism*) expression (magenta) was detected by *in situ* HCR in most GFP positive (green) nuclei adjacent to the neuropil as well as many nuclei in the cortex area, which were probably cortex glia based on the large size of the nuclei (predicted by scRNA-seq data).

**(J)** *Ensheathing(R56F03)>GFP* adult optic lobe where *Dop1R1* (*Dopamine 1-like receptor 1*) expression (magenta) was detected by *in situ* HCR in many GFP positive (green) nuclei adjacent to the medulla, lobula and lobula plate neuropils as well as nuclei in the cortex area of the medulla, lobula and lobula plate, marginal glia and proximal satellite glia (predicted by scRNA-seq data). All panels are single focal planes unless stated otherwise. Dashed lines outline the neuropils and scale bars are 20  $\mu$ m.

Figure 5 - FigS4

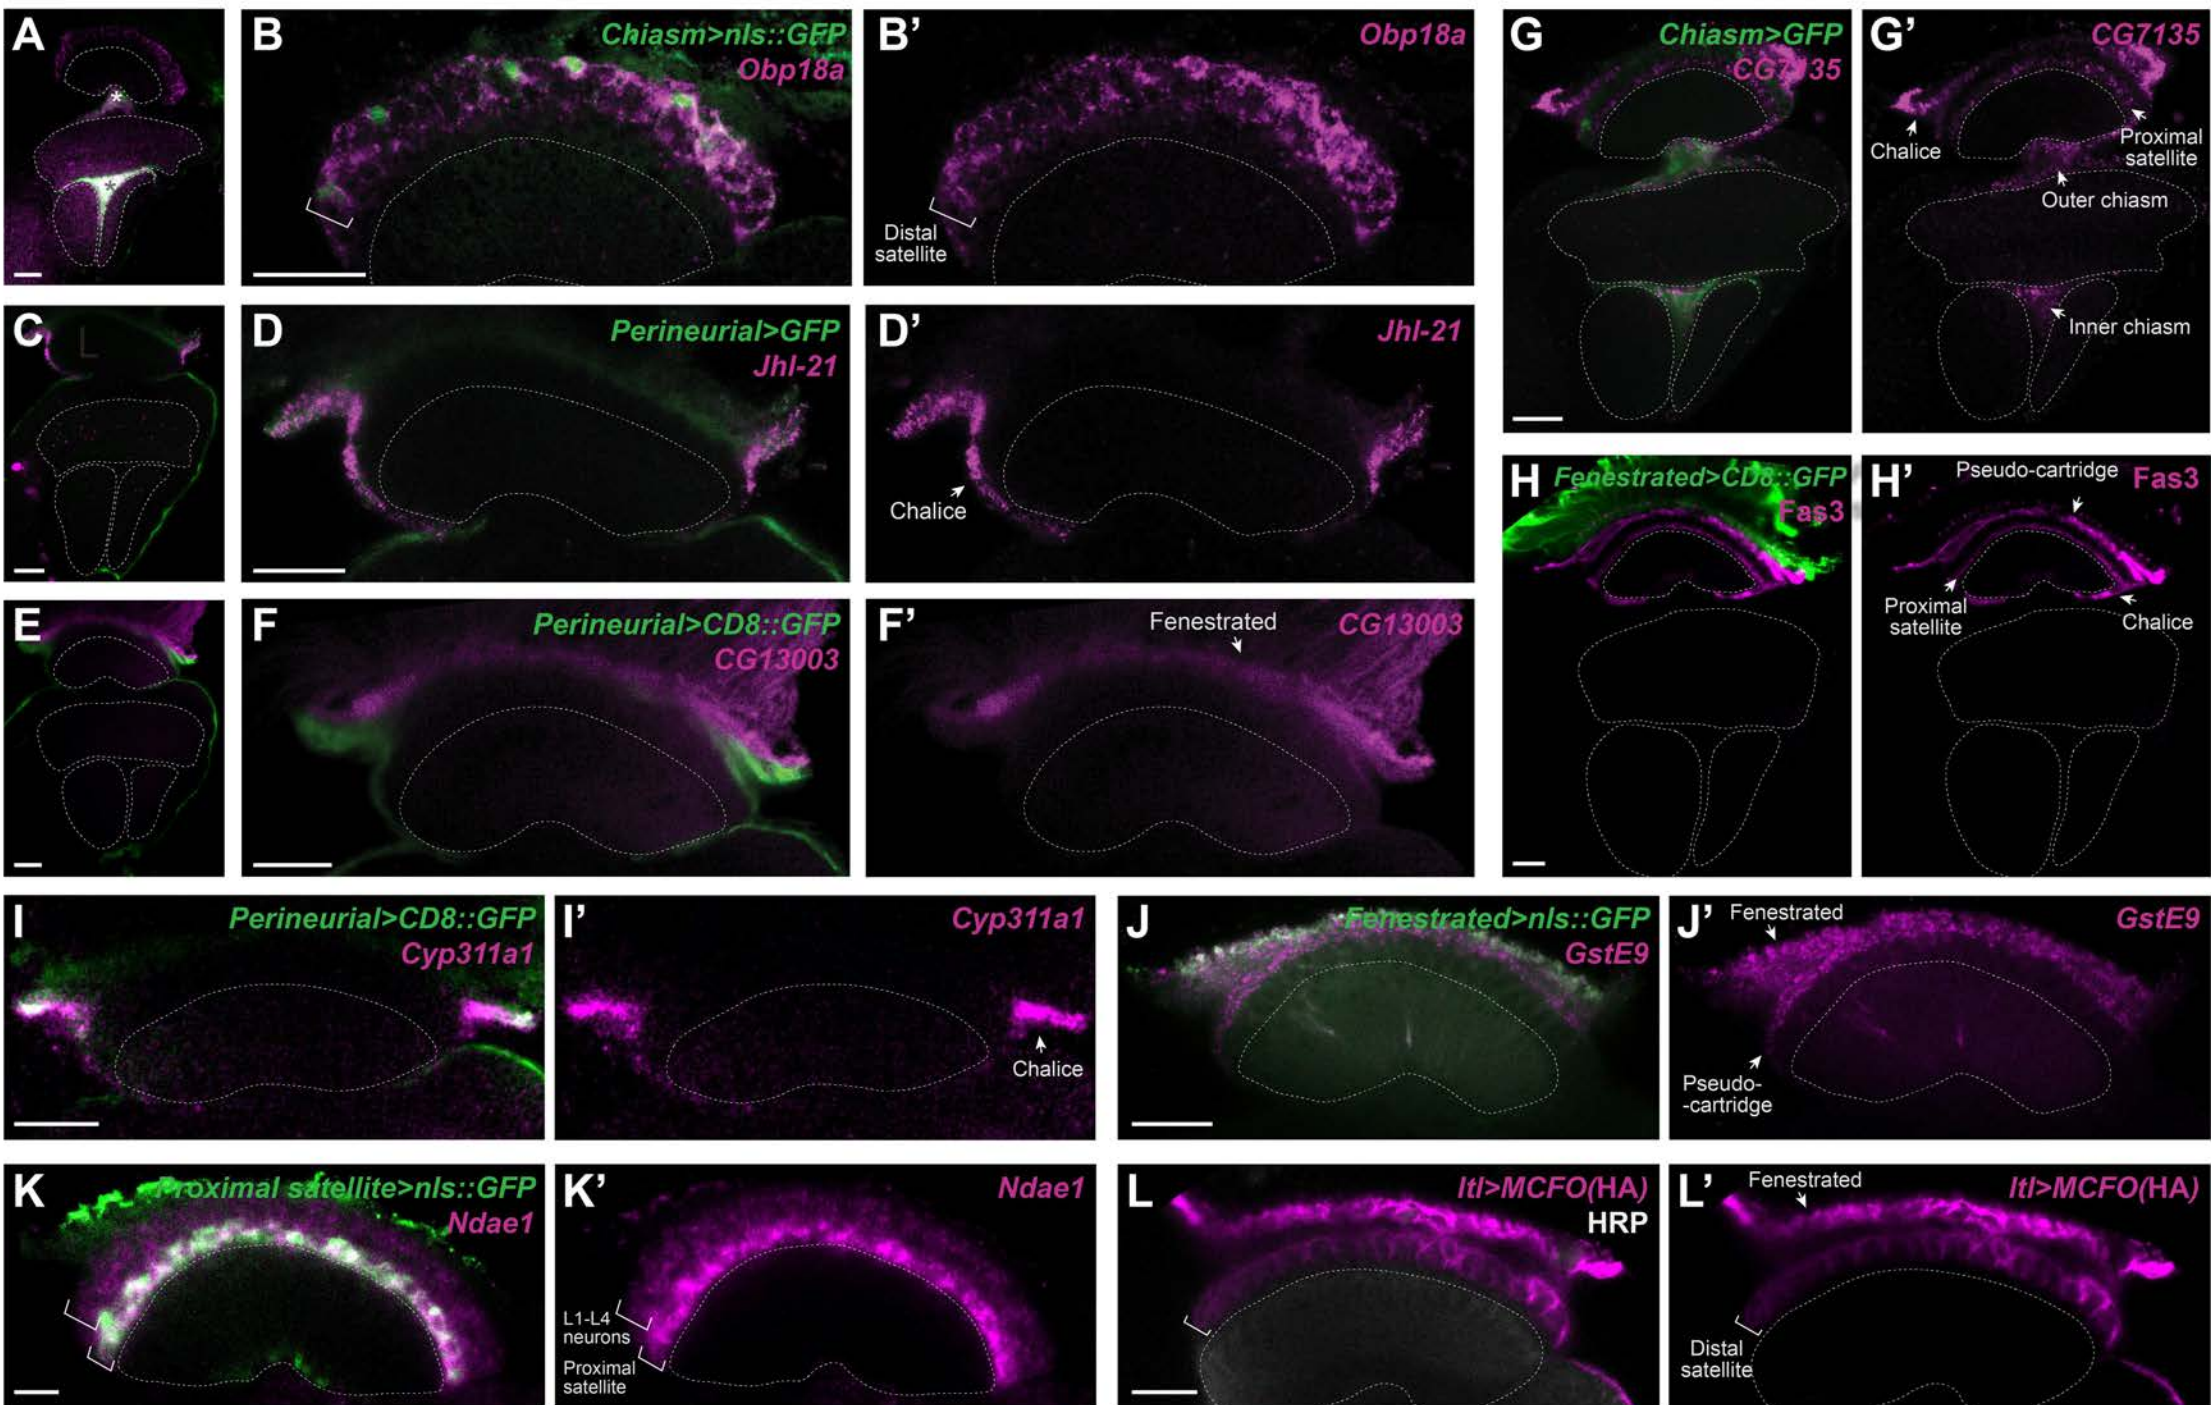

**Figure 5- supplementary figure S4. Validation of marker genes for lamina-specific glial subtypes of the young adult optic lobe.**

**(A,B)** *Chiasm(R53H12)>GFP* adult optic lobe, showing expression in chiasm and distal satellite glia. *Obp18a* expression (magenta) was detected by *in situ* HCR in most GFP positive (green) nuclei of chiasm and distal satellite glia.

**(C,D)** *Perineurial(R85G01)>GFP* adult optic lobe where *Jhl-21* (*Juvenile hormone Inducible-21*) expression (magenta) was detected by *in situ* HCR, specifically in chalice glia.

**(E,F)** *Perineurial(R85G01)>CD8::GFP* adult optic lobe where CG13003 expression (magenta) was detected by *in situ* HCR in fenestrated glia.

**(G)** *Chiasm(R53H12)>GFP* adult optic lobe where *CG7135* expression (magenta) was detected by *in situ* HCR in chiasm, chalice, and proximal satellite glia.

**(H)** Fas3 (magenta) antibody staining of *Fenestrated(R47G01)>CD8::GFP* adult optic lobe, showed expression in the lamina surface glia layer below the fenestrated glia, pseudo-cartridge glia, in the chalice, and proximal satellite glia.

**(I)** *Perineurial(R85G01)>CD8::GFP* adult optic lobe where *Cyp311a1* (*Cytochrome P450 311a1*) expression (magenta) was detected by *in situ* HCR, specifically in chalice glia.

**(J)** *Fenestrated(R47G01)>nls::GFP* adult optic lobe where *GstE9* (*Glutathione S transferase E9*) expression (magenta) was detected by *in situ* HCR in fenestrated and pseudo-cartridge glia.

**(K)** *Proximal satellite(R46H12)>nls::GFP* adult optic lobe where *Ndae1* (*Na<sup>+</sup>-driven anion exchanger 1*) expression (magenta) was detected by *in situ* HCR in proximal satellite glia, as well as in L1, L2, L3 and L4 lamina neurons, as predicted by the neuronal scRNA-seq data from Özel et al., 2021.

**(L)** Large MCFO clones labelled by *Itl-Gal4*, marked distal satellite (bar) and fenestrated glia (arrow). HRP in white.

All panels are single focal planes. Dashed lines outline the neuropils and scale bars are 20  $\mu$ m.

Figure 6

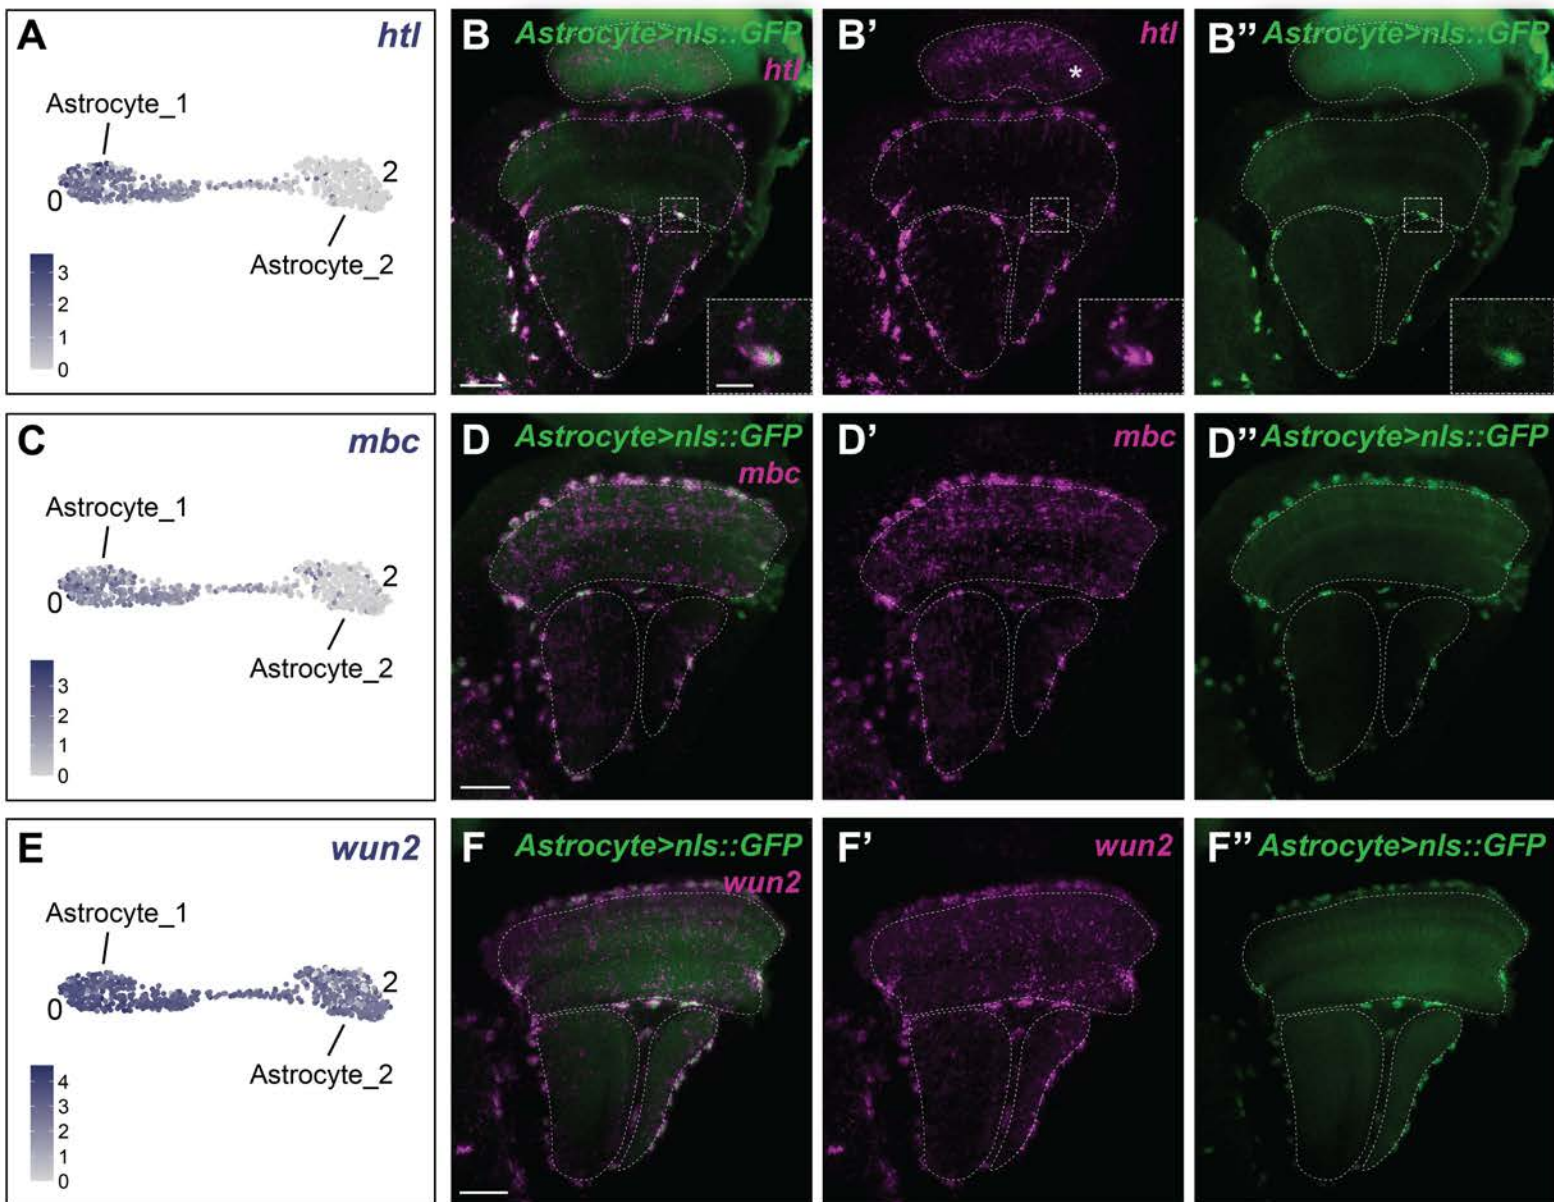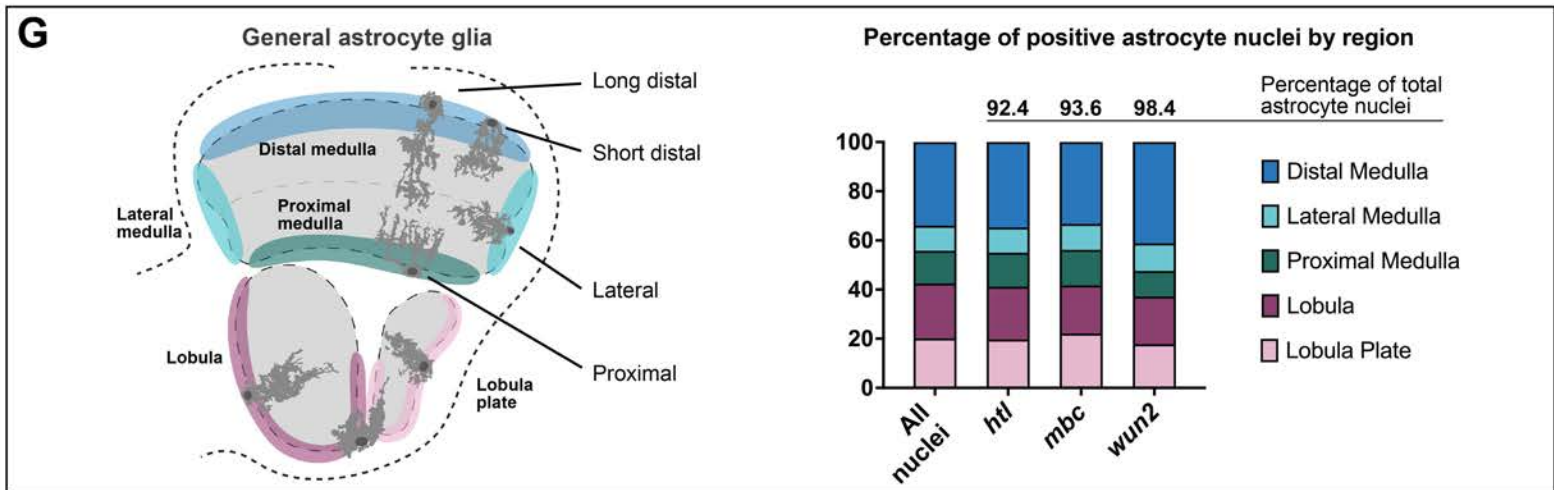



**Figure 6. Only one cluster within the astrocyte cluster multiplet corresponded to homeostatic astrocytes detected *in vivo***

**(A)** *htl* expression levels plotted on a UMAP showing only cluster #0 (Astrocyte\_1) and #2 (Astrocyte\_2). Each dot represents a single cell, and the colour represents the level of expression as indicated.

**(B)** *Astrocyte(R86E01)>nls::GFP* adult optic lobe in which all astrocyte nuclei were labelled with GFP and where *htl* expression (magenta) was detected by *in situ* HCR in most GFP positive nuclei.

**(C)** UMAP of clusters #0 and #2 showing *mbc* expression.

**(D)** *Astrocyte(R86E01)>nls::GFP* adult optic lobe where *mbc* expression (magenta) was detected by *in situ* HCR in most GFP (green) positive nuclei.

**(E)** UMAP of cluster #0 and #2 showing *wun2* expression.

**(F)** Maximum projection of *Astrocyte(R86E01)>nls::GFP* adult optic lobe where *wun2* expression (magenta) was detected by *in situ* HCR in most GFP (green) positive astrocyte nuclei of the medulla, lobula and lobula plate. Dashed lines outline the neuropils and scale bars are 20  $\mu\text{m}$  in (B,D,F).

**(G)**. Quantification of *htl*, *mbc* and *wun2* positive (medulla, lobula and lobula plate nuclei) astrocyte nuclei (*i.e.* GFP positive nuclei) from (B,D,F). More than 90% of astrocyte nuclei were positive for the three genes. Different regions of the medulla, lobula and lobula plate were defined, as these captured some differences in astrocyte morphotypes. The percentage of positive nuclei within each region was quantified and no significant difference (Chi-square test; *htl*  $p=.90$ , *mbc*  $p=.89$ , *wun2*  $p=.33$ ) was observed between the distribution of positive nuclei and the distribution of all nuclei in all five regions.

Figure 6 - FigS1

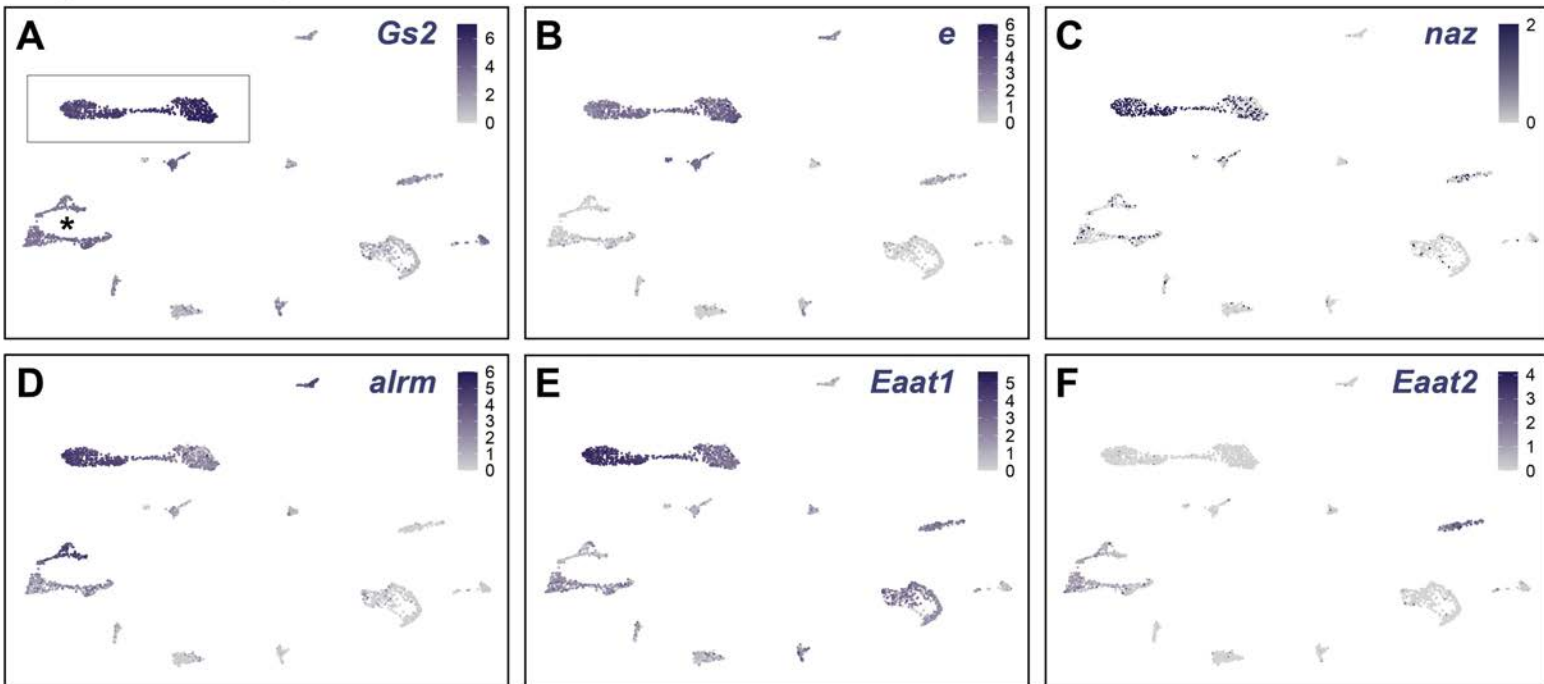

**Figure 6- supplementary figure S1. Expression levels of known astrocytic markers, and *Eaat2* ensheathing marker, in the young adult optic lobe glial clusters.**

**(A-C)** Plots showing *Gs2*, *e*, and *naz* expression levels in young adult optic lobe glial clusters. Each dot represents a single cell, and the colour represents the level of expression as indicated. As previously described (Kato et al., 2020), *Gs2* was expressed in both astrocytes (clusters indicated in a box in A) and ensheathing (clusters indicated with asterisk in A), while *e* and *naz* are expressed exclusively in astrocytes.

**(D)** *alrm*, a known astrocyte marker (Edwards et al., 2012), showed expression in the astrocyte clusters (box in A).

**(E)** *Eaat1*, a known astrocyte marker (Peco et al., 2016), showed expression in the astrocyte clusters (box in A).

**(F)** *Eaat2*, a known ensheathing marker (Peco et al., 2016), showed expression in the ensheathing clusters (asterisk in A) and no expression in the astrocyte clusters (box in A).

Figure 6 - FigS2

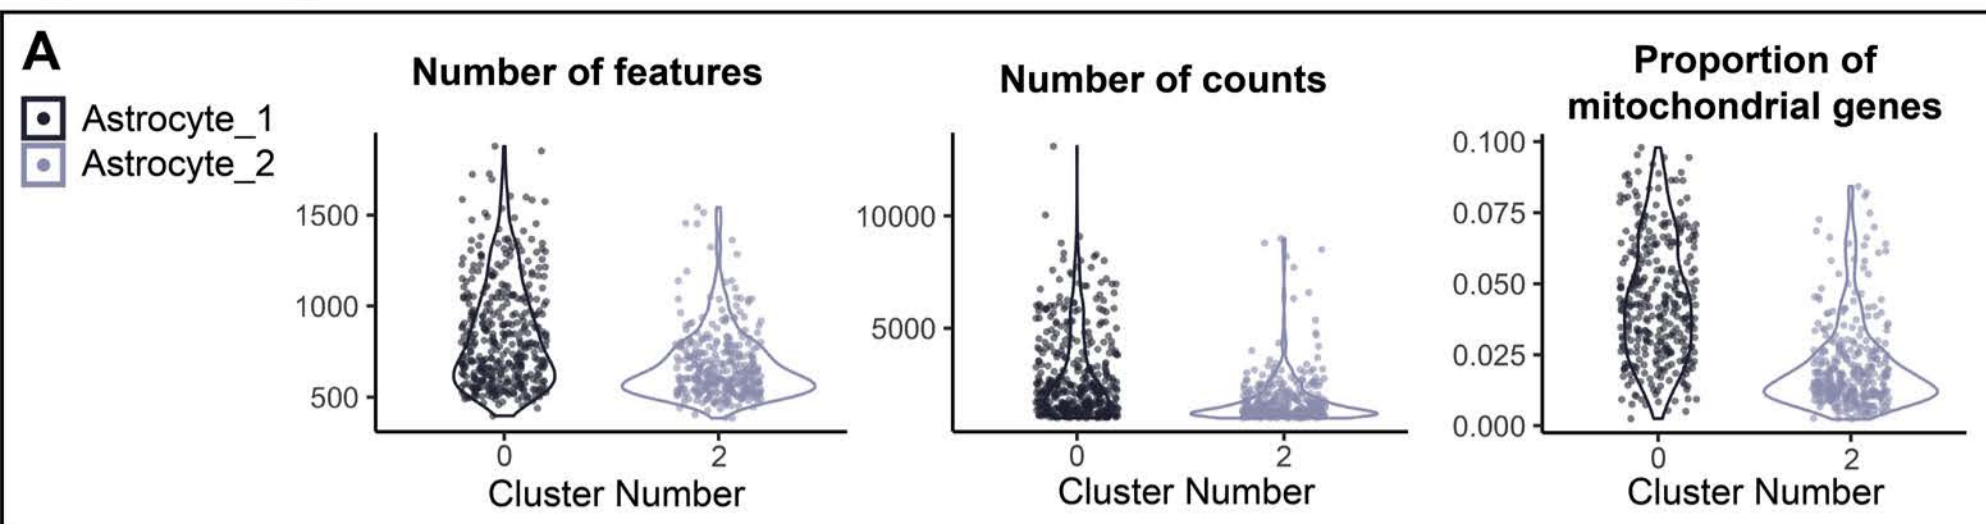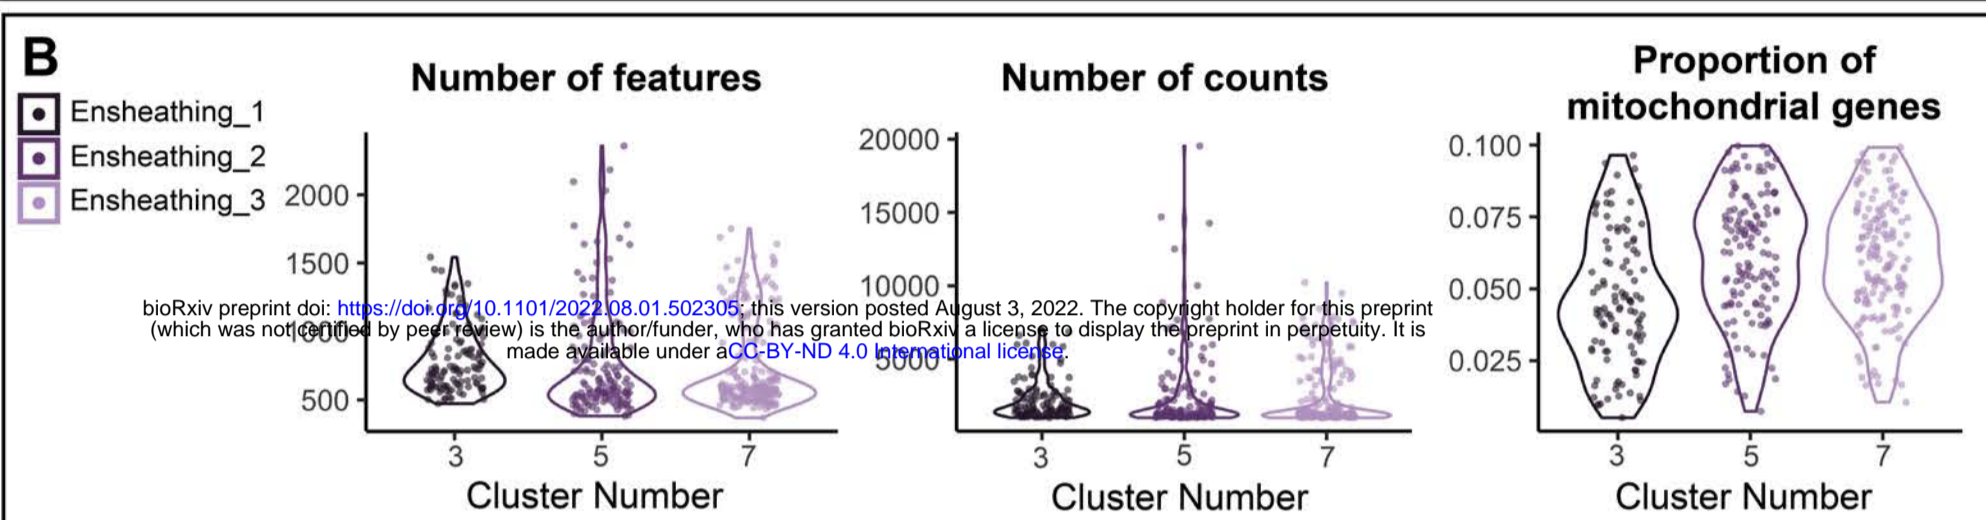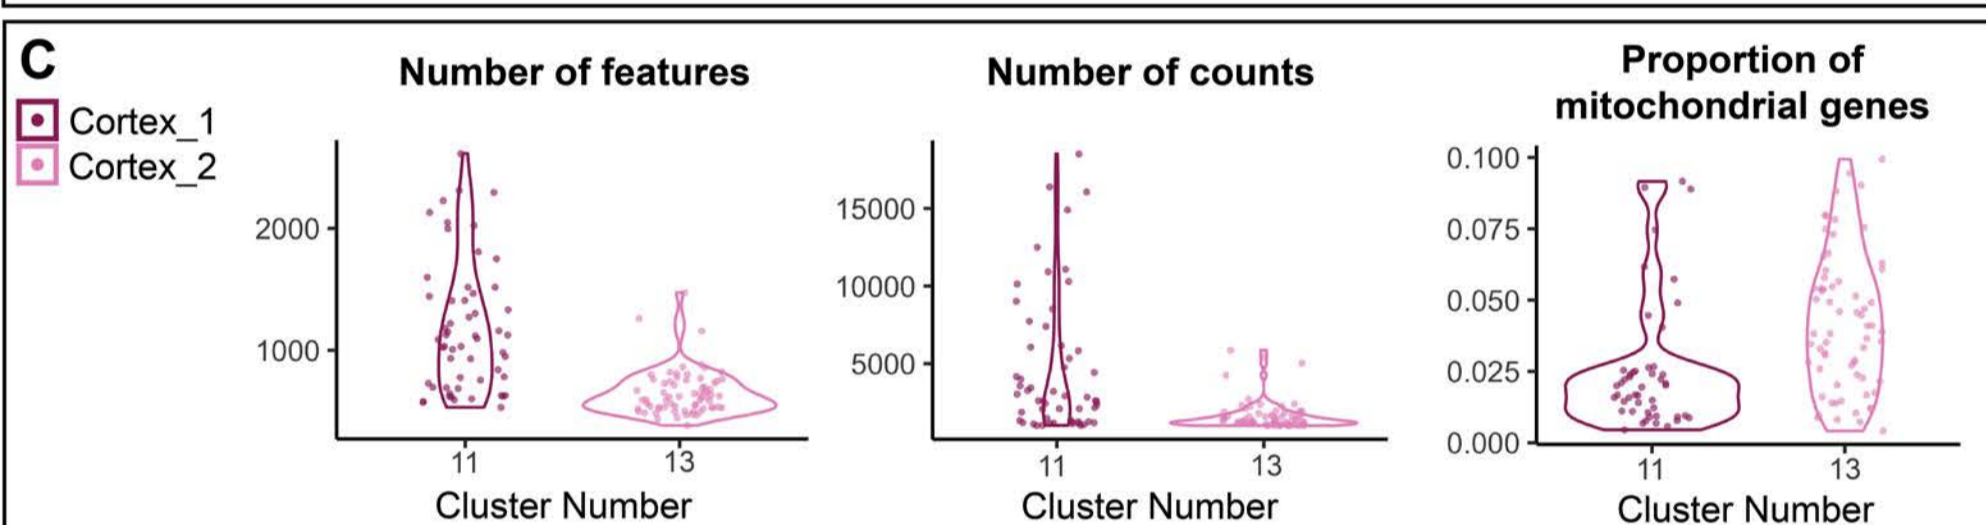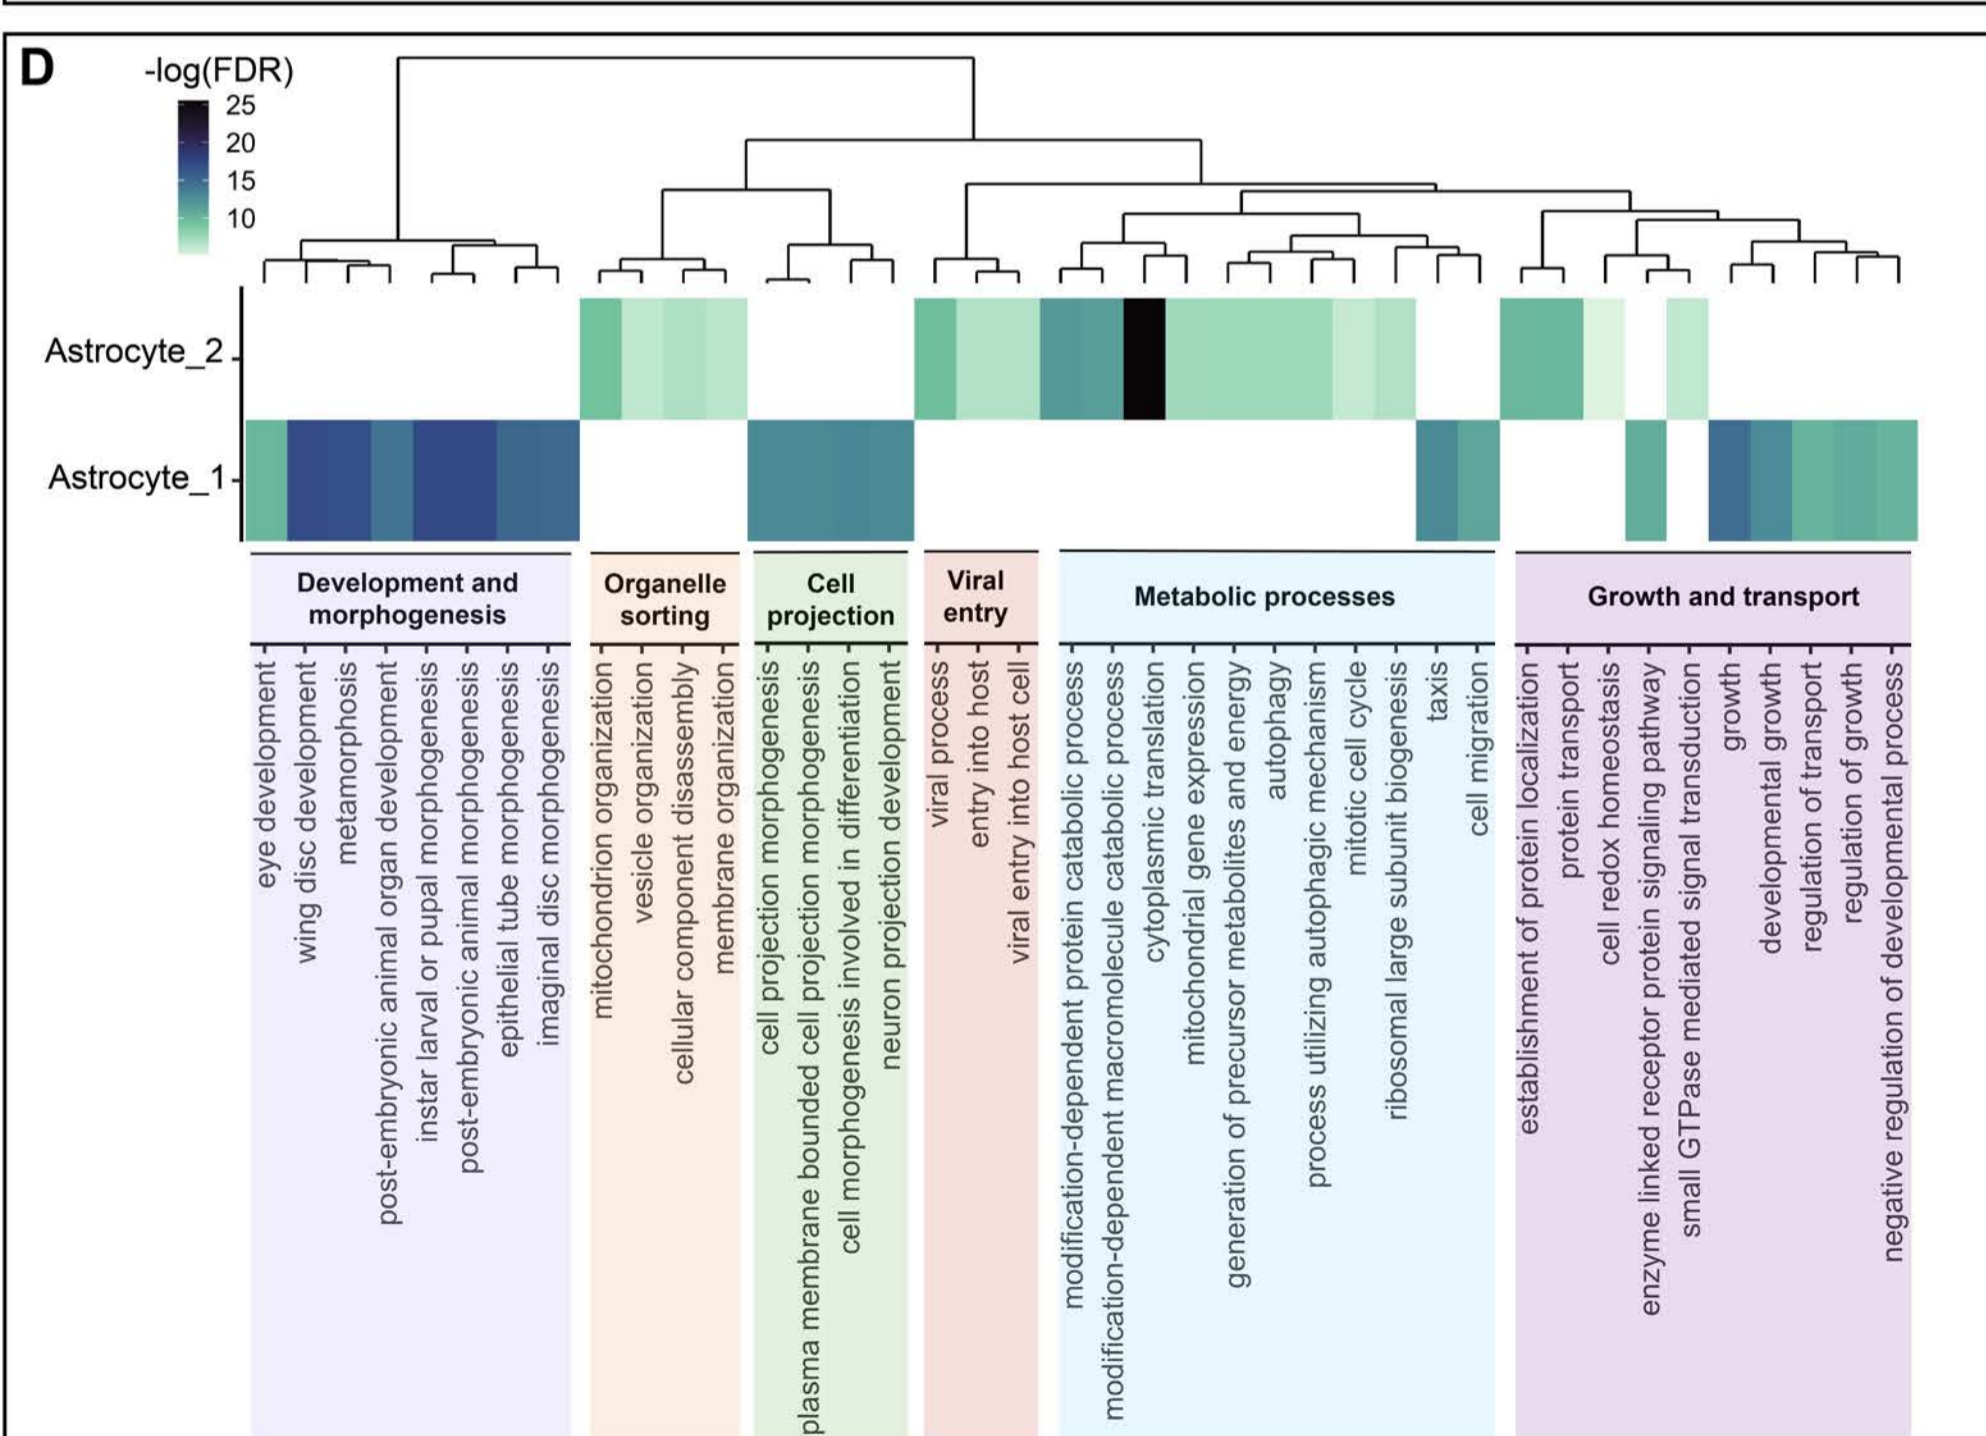

**Figure 6- supplementary figure S1. Assessment of the transcriptome quality of ‘multiplet’ clusters**

**(A-C)** Violin plots outlining the number of features, number of counts and proportion of mitochondrial genes, for the astrocyte **(A)**, ensheathing **(B)**, and cortex **(C)** glia cluster multiplets. Cluster identity is colour-coded and the cluster number is indicated on the x-axes.

**(A)** Astrocyte multiplets showed no overall trend in transcriptome quality.

**(B)** Ensheathing glia showed a decrease in transcriptome quality in clusters #5 and #7, compared to #3.

**(C)** Cortex glia cluster #13 appears to be of a lower quality than #11.

**(D)** GO analysis indicating the enriched biological processes in Astrocyte\_1 (cluster #0) and Astrocyte\_2 (cluster #2).

# Figure 7

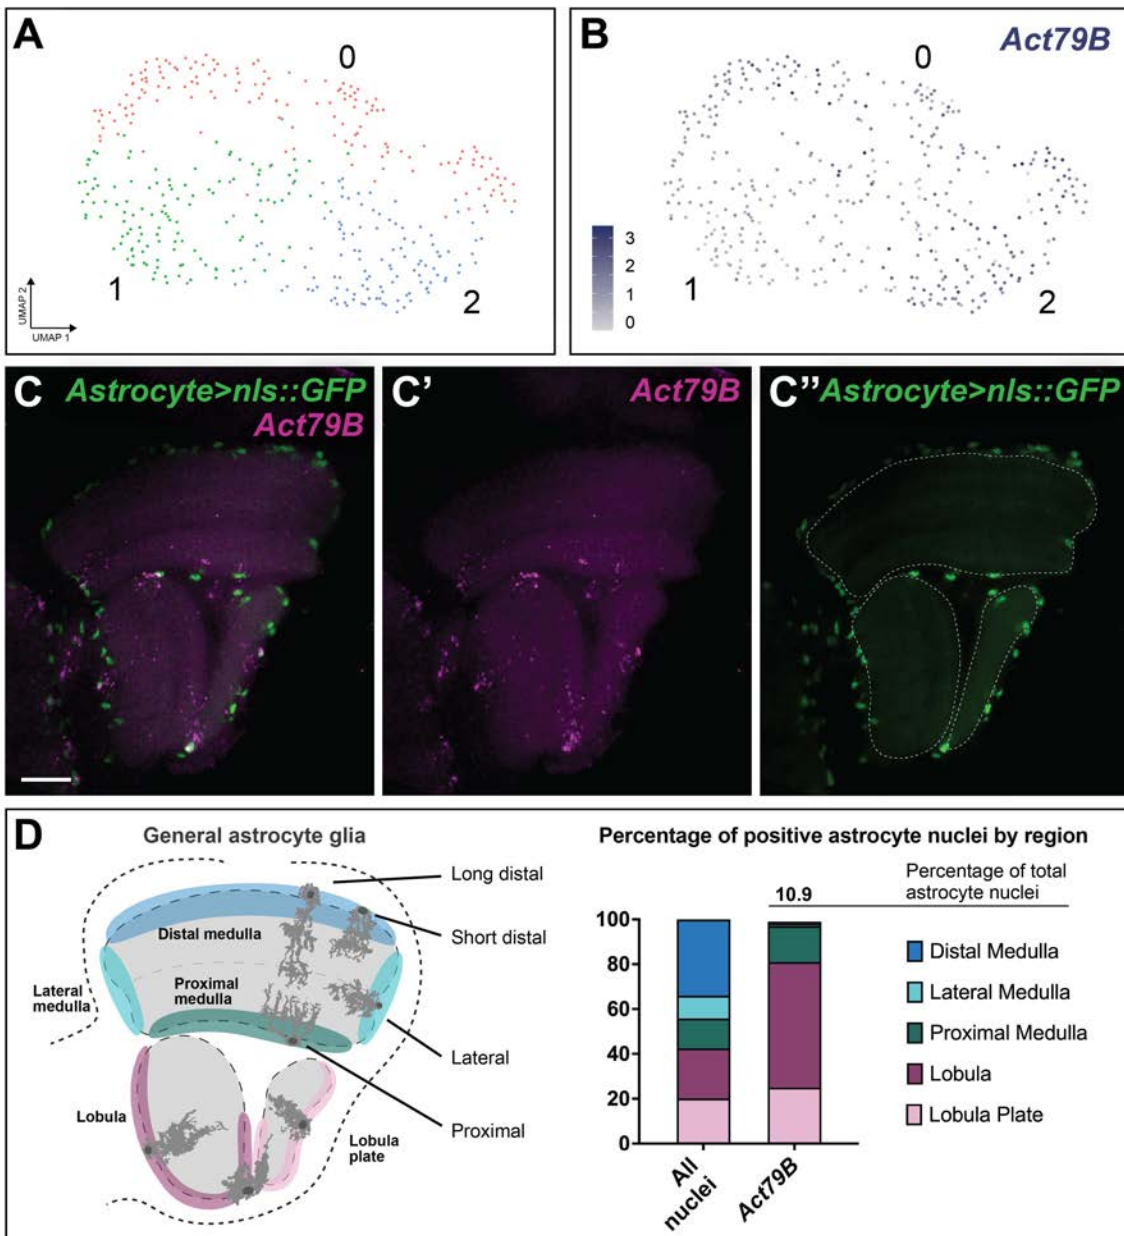

**Figure 7. Analysis of clusters obtained from subclustering cluster #0 (Astrocyte\_1; homeostatic astrocytes)**

**(A)** UMAP of the subclusters obtained from the subclustering of Astrocyte\_1 (cluster #0).

**(B)** *Act79B* expression levels plotted on the same UMAP.

**(C)** Maximum projection of *astrocyte(R86E01)>nls::GFP* adult optic lobe where *Act79B* expression (magenta) was detected by *in situ* HCR in a sparse subset of GFP (green) positive astrocyte nuclei of the medulla, lobula, and lobula plate. Dashed lines outline the neuropils and scale bar is 20  $\mu\text{m}$ .

**(D)** Quantification of *Act79B* positive astrocyte nuclei (*i.e.* GFP positive nuclei) from (C)

Approximately 11% of astrocyte nuclei were positive for *Act79B in vivo*. The percentage of positive nuclei within each indicated region was quantified, showing *Act79B* was preferentially expressed in astrocytes of the lateral and proximal medulla, lobula, and lobula plate (Chi-squared test,  $p < .0001$ ).

Figure 8

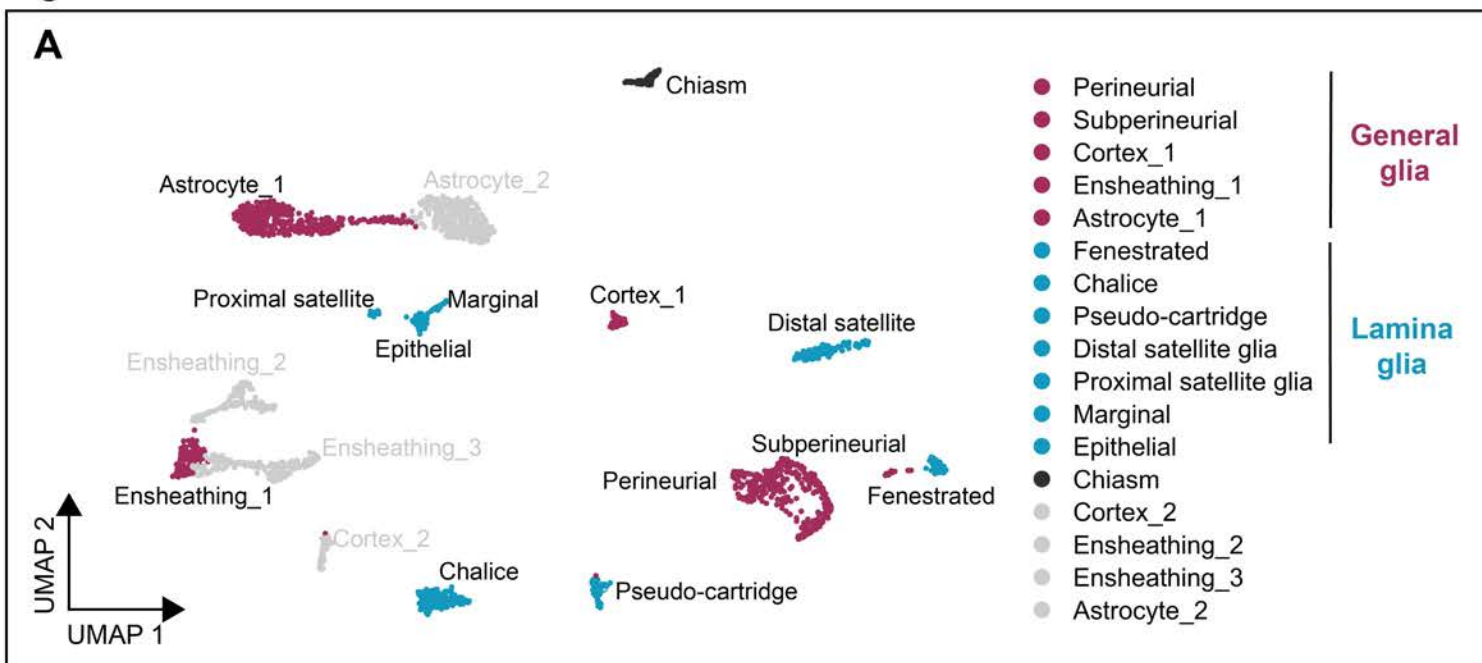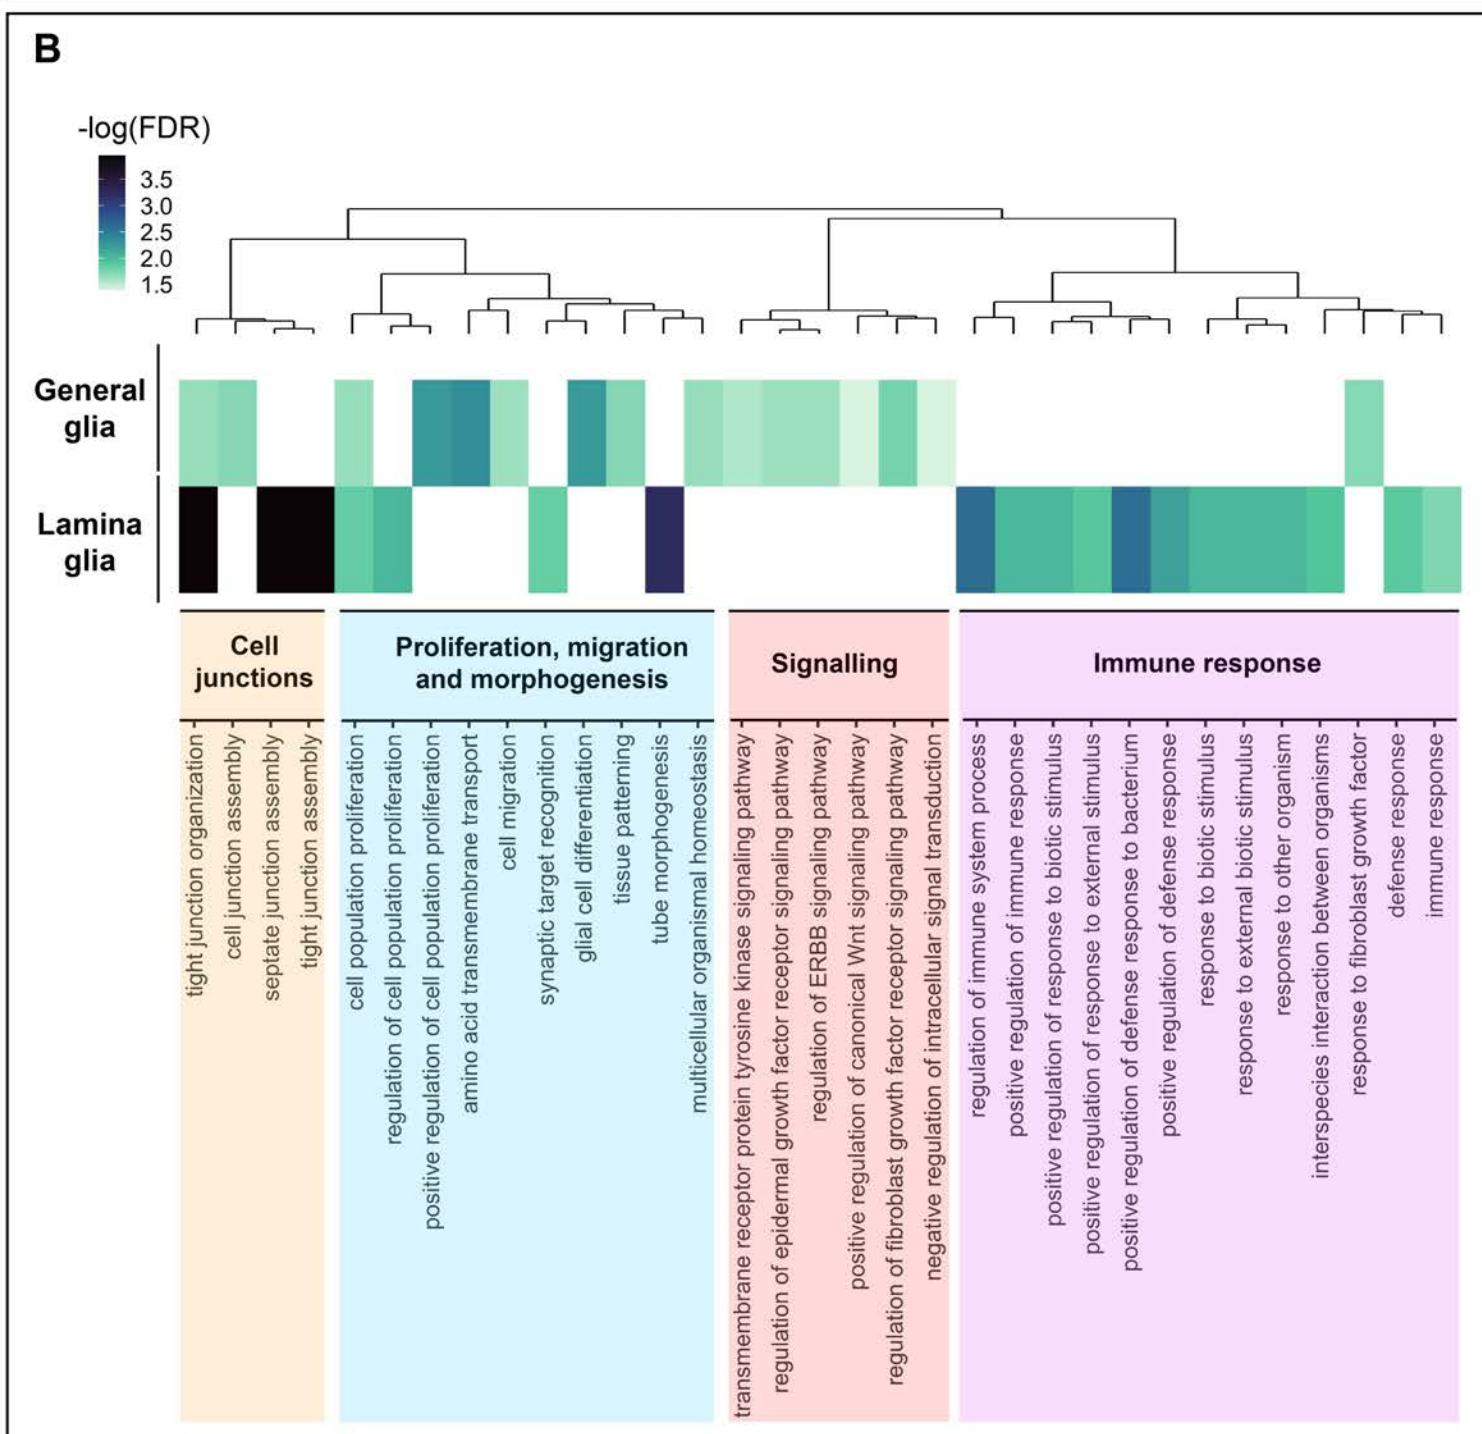



**Figure 8. Lamina glia are specialized to perform immune-related functions**

**(A)** UMAP of the adult optic lobe glia colour-coded for lamina (maroon) and ‘general’ (medulla, lobula, and lobula plate; blue) glial clusters that were included in the GO analysis in (B). Note that the chiasm glia cluster (dark grey) and non-homeostatic clusters belonging to multiplets (light grey) were excluded from the analysis in (B).

**(B)** GO enrichment analysis for biological processes of the lamina glia compared to other (general) optic lobe glia shown as a heatmap. We used a dendrogram to cluster GO terms into groups that were defined by a super-term. The scale indicates the negative log of the false discovery rate (FDR).

# Figure 9

bioRxiv preprint doi: <https://doi.org/10.1101/2022.08.01.502305>; this version posted August 3, 2022. The copyright holder for this preprint (which was not certified by peer review) is the author/funder, who has granted bioRxiv a license to display the preprint in perpetuity. It is made available under aCC-BY-ND 4.0 International license.

## A Integrated UMAP

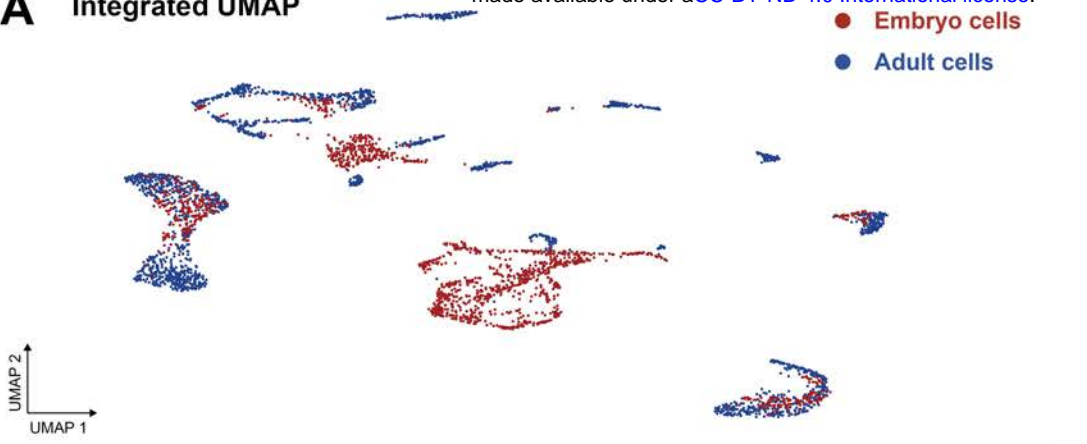

## B Integrated UMAP indicating the embryo glial clusters

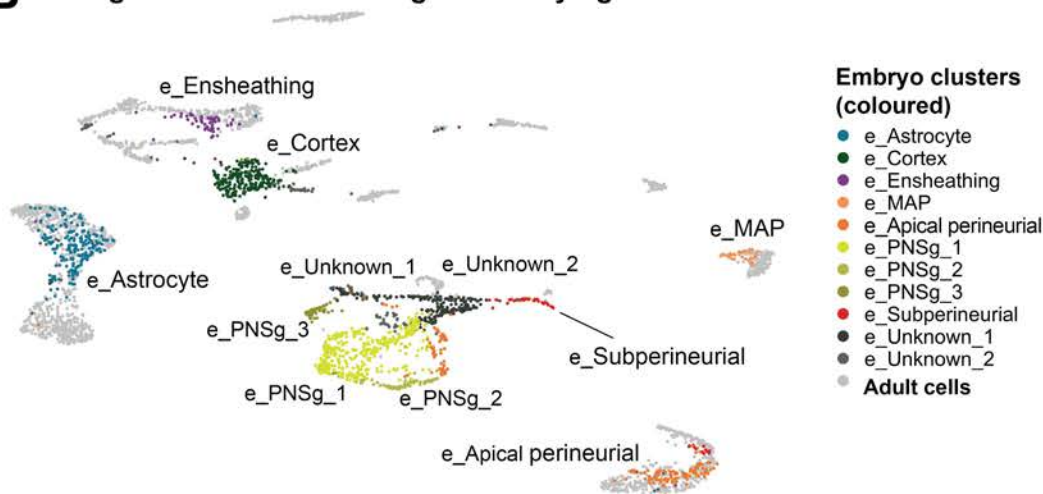

## C Integrated UMAP indicating the adult glial clusters

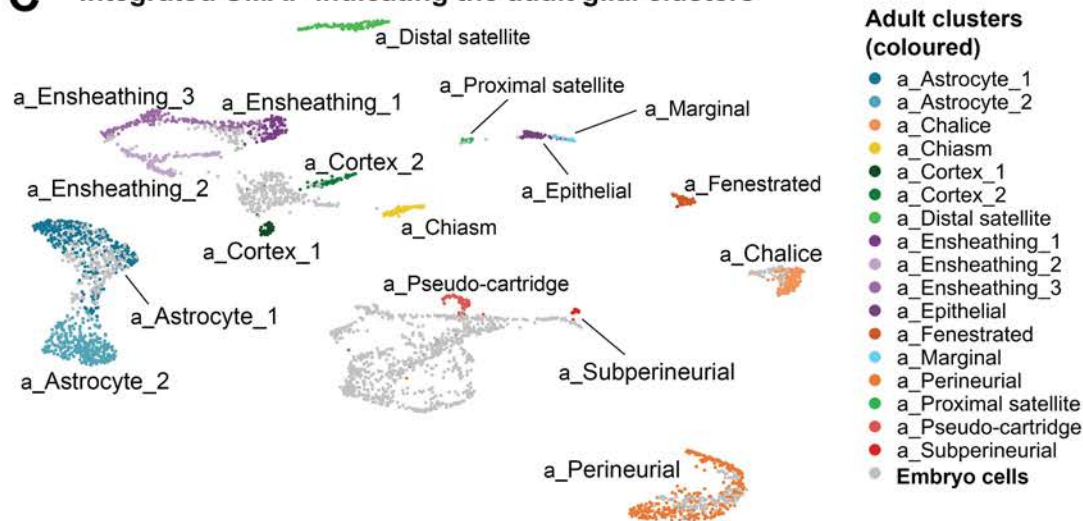

## D

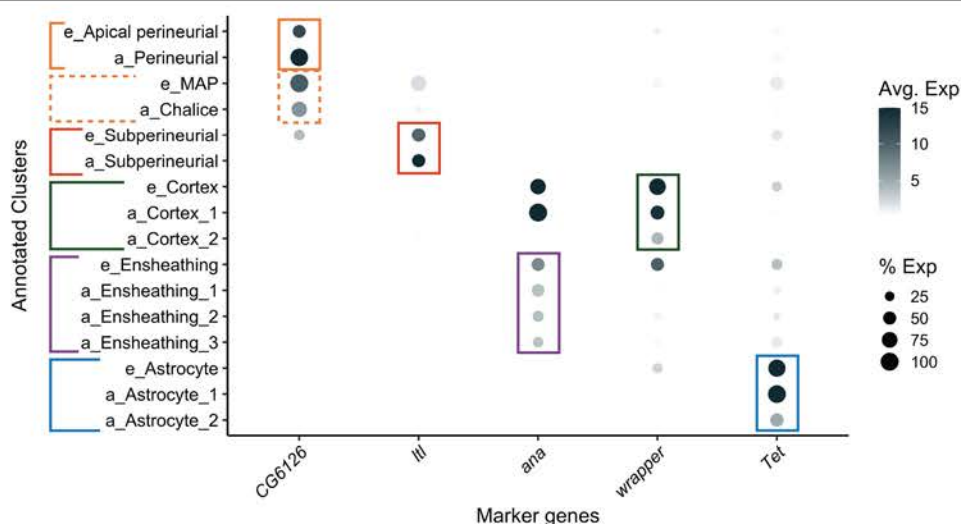

**Figure 9. Integration of the embryonic stage 17 CNS and young adult optic lobe glial clusters.**

**(A)** UMAP of the integrated dataset, highlighting the embryonic (red) and young adult optic lobe (blue) glial clusters.

**(B-C)** UMAP of the integrated dataset, highlighting embryonic (B, 'e\_') or the young adult optic lobe (C, 'a\_') glial clusters in colours by glial class. Grey marks cells from the young adult optic lobe clusters in (B) and from the embryonic clusters in (C).

**(D)** Expression plot of genes with expression in the same glial class of the embryo and adult. The size of the dot represents the percentage of cells with expression in each cluster, while the colour of the dot represents the level of average expression in the cluster. The five genes indicated were validated *in vivo* for both time points by independent strategies: *CG6126* for perineurial (embryo, Figure 4C; adult, Figure 5- supplementary figure S3F) and chalice (Figure 5- supplementary figure S3F) and MAP (Figure 4- supplementary figure S3F), *ItI* for subperineurial (embryo, Figure 4- supplementary figure S3C,E; adult, Figure 5- supplementary figure S3C-E), *ana* for ensheathing (embryo, Figure 4- supplementary figure S2A; adult, Figure 5- supplementary figure S3I), *wrapper* for cortex (embryo, Figure 4F; adult, Figure 5- supplementary figure S2B) and *Tet* for astrocyte (embryo, Figure 4- supplementary figure S1B,D,E; adult, Figure 5- supplementary figure S2A).

# Source data Figure 1

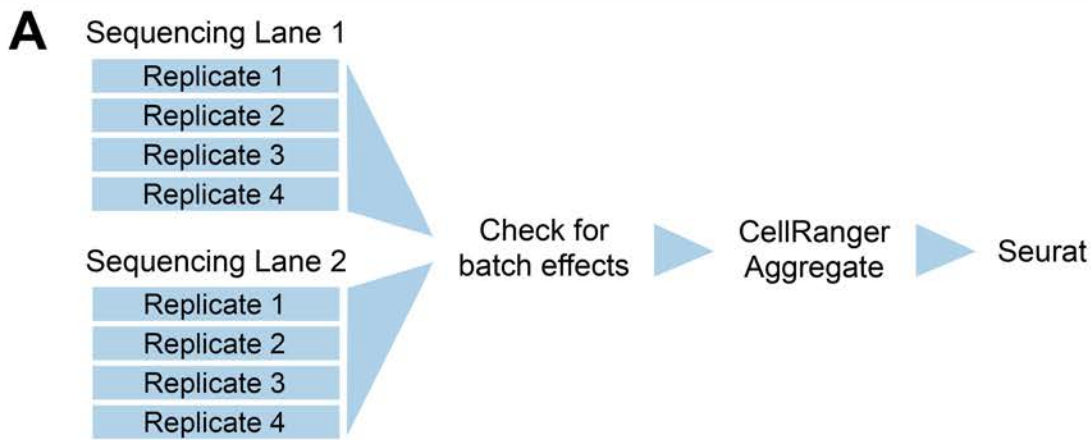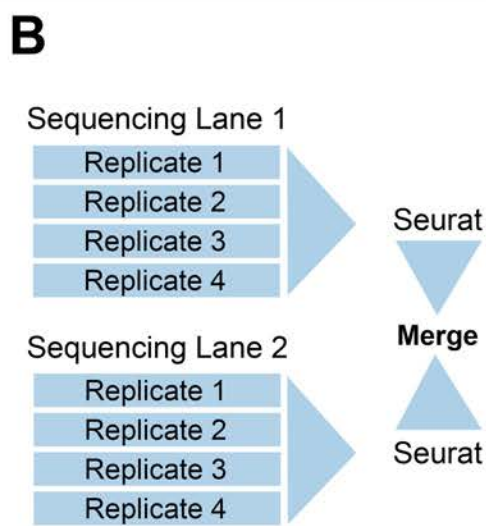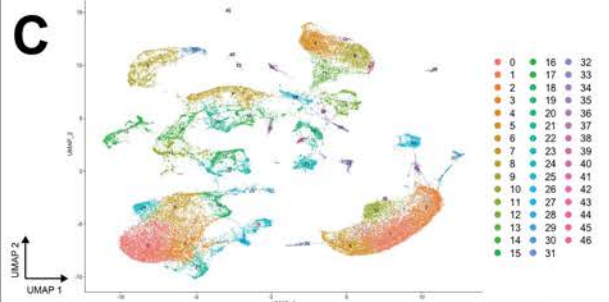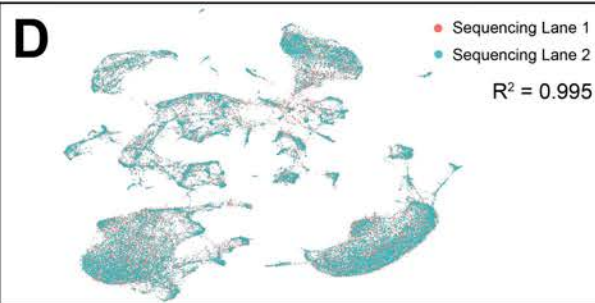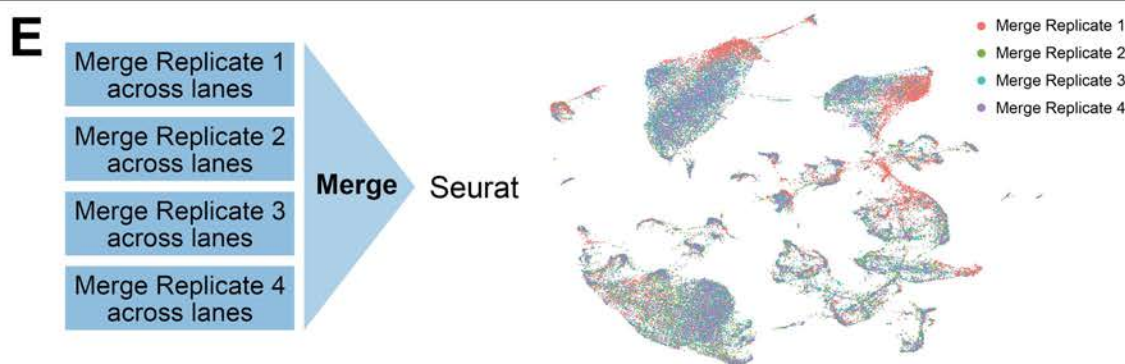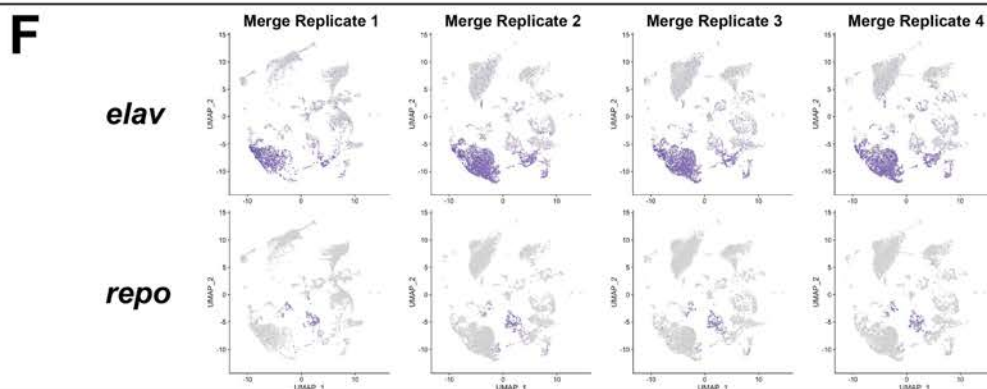

**Source Data Figure 1: Examining batch effects between technical and biological replicates for embryonic scRNA-seq.**

**(A)** Schematic of data analysis for stage 17 whole embryo. 10X libraries were prepared from four biological replicates, each sequenced across two separate lanes. Following examination for batch effects **(B-F)** using the 8 sets of resulting Cell Ranger outputs, Cell Ranger Aggregate was used to merge the data. The resulting Cell Ranger outputs (Sarah\_aggr\_trial1\_barcodes.tsv, Sarah\_aggr\_trial1\_features.tsv, Sarah\_aggr\_trial1\_matrix.mtx) were then read into Seurat for downstream processing (see Materials and Methods).

**(B)** Schematic of data analysis to check for batch effects between sequencing lanes. As this analysis predates Seurat integration functionalities, the stage 17 embryo data generated from sequencing lane 1 (biological replicates 1-4) and sequencing lane 2 (biological replicates 1-4) were combined into 2 Seurat objects, merged and clustered **(C)**. The number of cells derived from each sequencing lane were calculated for each cluster in UMAP space, and the correlation between the two sequencing lanes was calculated ( $R^2 = 0.995$ ) (see “220706 gliapaper supp fig 1.Rmd”).

**(D)** Lane-of-origin was plotted onto the clusters in UMAP space, showing an even distribution across all clusters. Together, these analyses demonstrate the absence of batch effects between sequencing lanes.

**(E)** Schematic of data analysis for examining batch effects between biological replicates. Reads for each biological replicate were combined across both sequencing lanes. These four objects were then merged using Seurat, and clustered using standard methods. Biological-replicate-of-origin for each cell was plotted onto the clusters in UMAP space. Cells derived from each of the four biological replicates contributed equally to the neuronal (illustrated by *elav* expression) and glial (illustrated by *repo* expression) clusters of the UMAP **(F)**, demonstrating the absence of batch effects across the replicates.

**Source Data Table 1: List of specific genotypes and conditions used by figure panel**

| Fig. | Panel | Glial Subtype      | Genotype                                                                                          | Conditions                                                                                                                                                                                         |
|------|-------|--------------------|---------------------------------------------------------------------------------------------------|----------------------------------------------------------------------------------------------------------------------------------------------------------------------------------------------------|
| 1    | B     | VNC perineurial    | <i>w[1118]/pBPhsFlp2;; Mi{Trojan-GAL4.1}CG6126[MI12300-TG4.1]/ UAS-HA_V5_FLAG</i>                 | Raised at 25°C before and after heat shocking. 6 hour after egg laying embryos were heat stocked at 37°C for 15 minutes, quenched at 4°C for 10 minutes, and reared at 25°C until larval hatching. |
| 1    | C, D  | VNC MAP            | <i>w[1118]/pBPhsFlp2; Tl{GFP[3xP3.cLa]=CRIMIC.TG4.2}CG5080[CR01346-TG4.2]/+; UAS-HA_V5_FLAG/+</i> | Raised at 25°C before and after heat shocking. 6 hour after egg laying embryos were heat stocked at 37°C for 15 minutes, quenched at 4°C for 10 minutes, and reared at 25°C until larval hatching. |
| 1    | E     | VNC subperineurial | <i>w[1118]/pBPhsFlp2; moody-GAL4.SPG; UAS-HA_V5_FLAG/+</i>                                        | Raised at 25°C before and after heat shocking. 6 hour after egg laying embryos were heat stocked at 37°C for 15 minutes, quenched at 4°C for 10 minutes, and reared at 25°C until larval hatching. |
| 1    | F     | VNC cortex         | <i>w[1118]/pBPhsFlp2; sp/+; R54H02-Gal4/UAS-HA_V5_FLAG</i>                                        | Raised at 25°C before and after heat shocking. 6 hour after egg laying embryos were heat stocked at 37°C for 15 minutes, quenched at 4°C for 10 minutes, and reared at 25°C until larval hatching. |
| 1    | G     | VNC ensheathing    | <i>w[1118]/pBPhsFlp2; Tl{CRIMIC.TG4.2}Eaat2[CR00503-TG4.2]/+; UAS-HA_V5_FLAG/+</i>                | Raised at 25°C before and after heat shocking. 6 hour after egg laying embryos were heat stocked at 37°C for 15 minutes, quenched at 4°C for 10 minutes, and reared at 25°C until larval hatching. |
| 1    | H     | VNC astrocyte      | <i>w[1118]/pBPhsFlp2;; alrm-Gal4/ UAS-HA_V5_FLAG</i>                                              | Raised at 25°C before and after heat shocking. 6 hour after egg laying embryos were heat stocked at 37°C for 15 minutes, quenched at 4°C for 10 minutes, and reared at 25°C until larval hatching. |
| 2    | B     | Perineurial        | <i>w[1118]/pBPhsFlp2;; R85G01-Gal4/UAS-HA_V5_FLAG</i>                                             | Raised at 18°C before and after heat shocking. 0-5 day-old adults were heat shocked at 37°C for 2 minutes.                                                                                         |
| 2    | C     | Subperineurial     | <i>w[1118]/pBPhsFlp2;; R54C07-Gal4/UAS-HA_V5_FLAG</i>                                             | Raised at 18°C before and after heat shocking. 0-5 day-                                                                                                                                            |

|   |      |                        |                                                                                                                   |                                                                                                            |
|---|------|------------------------|-------------------------------------------------------------------------------------------------------------------|------------------------------------------------------------------------------------------------------------|
|   |      |                        |                                                                                                                   | old adults were heat shocked at 37°C for 3 minutes.                                                        |
| 2 | D    | Chalice                | <i>w[1118]/pBPhsFlp2;; R10C12-Gal4/UAS-HA_V5_FLAG</i>                                                             | Raised at 18°C before and after heat shocking. 0-5 day-old adults were heat shocked at 37°C for 5 minutes. |
| 2 | E    | Carpet                 | <i>w[1118]/pBPhsFlp2;; R54C07-Gal4/UAS-HA_V5_FLAG</i>                                                             | Raised at 18°C before and after heat shocking. 0-5 day-old adults were heat shocked at 37°C for 1 minutes. |
| 2 | F    | Fenestrated            | <i>w[1118]/pBPhsFlp2;; R47G01-Gal4/UAS-HA_V5_FLAG</i>                                                             | Raised at 18°C before and after heat shocking. 0-5 day-old adults were heat shocked at 37°C for 3 minutes. |
| 2 | G    | Pseudo-cartridge       | <i>w[1118]/pBPhsFlp2;; R54C07-Gal4/UAS-HA_V5_FLAG</i>                                                             | Raised at 18°C before and after heat shocking. 0-5 day-old adults were heat shocked at 37°C for 2 minutes. |
| 2 | H    | Cortex                 | <i>w[1118]/pBPhsFlp2; sp/+; R54H02-Gal4/UAS-HA_V5_FLAG_OLLAS</i>                                                  | Raised at 18°C before and after heat shocking. 0-5 day-old adults were heat shocked at 37°C for 4 minutes. |
| 2 | I    | Distal satellite       | <i>w[1118]/pBPhsFlp2;; R53H12-Gal4/UAS-HA_V5_FLAG</i>                                                             | Raised at 18°C before and after heat shocking. 0-5 day-old adults were heat shocked at 37°C for 4 minutes. |
| 2 | J    | Proximal satellite     | <i>w[1118]/pBPhsFlp2; sp/+; R54H02/UAS_HA_V5_FLAG_OLLAS</i><br><i>♂ pBPhsFlp2; sp/+; Repo-Gal4/UAS-HA_V5_FLAG</i> | Raised at 18°C before and after heat shocking. 0-5 day-old adults were heat shocked at 37°C for 6 minutes. |
| 2 | K    | Inner and outer chiasm | <i>w[1118]/pBPhsFlp2;; R53H12-Gal4/UAS-HA_V5_FLAG</i>                                                             | Raised at 18°C before and after heat shocking. 0-5 day-old adults were heat shocked at 37°C for 4 minutes. |
| 2 | L    | Ensheathing            | <i>♀ yw, hsf1p[122]/pBPhsFlp2; sp/+; R56F03-Gal4/UAS-HA_V5_FLAG</i>                                               | Raised at 18°C before and after heat shocking. 0-5 day-old adults were heat shocked at 37°C for 2 minutes. |
| 2 | M, N | Ensheathing            | <i>♂ pBPhsFlp2; sp/+; R56F03-Gal4/UAS-HA_V5_FLAG</i>                                                              | Raised at 18°C before and after heat shocking. 0-5 day-old adults were heat shocked at 37°C for 5 minutes. |
| 2 | O    | Ensheathing            | <i>♂ pBPhsFlp2; sp/+; R56F03-Gal4/UAS-HA_V5_FLAG</i>                                                              | Raised at 18°C before and after heat shocking. 0-5 day-old adults were heat shocked at 37°C for 4 minutes. |
| 2 | P    | Marginal               | <i>w[1118]/pBPhsFlp2; R35E04-Gal4/+; UAS-HA_V5_FLAG_OLLAS/+</i>                                                   | Raised at 18°C before and after heat shocking. 0-5 day-old adults were heat shocked at 37°C for 2 minutes. |

|        |                 |                    |                                                                |                                                                                                            |
|--------|-----------------|--------------------|----------------------------------------------------------------|------------------------------------------------------------------------------------------------------------|
| 2      | Q               | Astrocyte          | ♀ <i>yw, hsf1p[122]/pBPhsFlp2;; R86E01-Gal4/UAS-HA_V5_FLAG</i> | Raised at 18°C before and after heat shocking. 0-5 day-old adults were heat shocked at 37°C for 2 minutes. |
| 2      | R, S, T, U, V   | Astrocyte          | ♂ <i>pBPhsFlp2;; R86E01-Gal4/UAS-HA_V5_FLAG</i>                | Raised at 18°C before and after heat shocking. 0-5 day-old adults were heat shocked at 37°C for 5 minutes. |
| 2      | W               | Epithelial         | ♂ <i>pBPhsFlp2; sp/+; Repo-Gal4/ UAS-HA_V5_FLAG</i>            | Raised at 18°C before and after heat shocking. 0-5 day-old adults were heat shocked at 37°C for 3 minutes. |
| 2 - S1 | A, B            | Perineurial        | <i>w[1118]; UAS-CD8::GFP; R85G01-Gal4</i>                      | Raised at 25°C. Adults dissected between 0-7 days old.                                                     |
| 5 - S4 | E, F, F', I, I' |                    |                                                                |                                                                                                            |
| 2 - S1 | C, D            | Subperineurial     | <i>w[1118]; UAS-CD8::GFP; R54C07-Gal4</i>                      | Raised at 25°C. Adults dissected between 0-7 days old.                                                     |
| 2 - S1 | E               | Astrocyte          | <i>w[1118]; UAS-CD8::GFP; R86E01-Gal4</i>                      | Raised at 25°C. Adults dissected between 0-7 days old.                                                     |
| 2 - S1 | F               | Ensheathing        | <i>w[1118]; UAS-CD8::GFP; R56F03-Gal4</i>                      | Raised at 25°C. Adults dissected between 0-7 days old.                                                     |
| 2 - S1 | G               | Chiasm             | <i>w[1118]; UAS-CD8::GFP; R53H12-Gal4</i>                      | Raised at 25°C. Adults dissected between 0-7 days old.                                                     |
| 2 - S1 | H               | Cortex             | <i>w[1118]; UAS-CD8::GFP; R54H02-Gal4</i>                      | Raised at 25°C. Adults dissected between 0-7 days old.                                                     |
| 2 - S1 | I               | Epithelial         | <i>w[1118]; UAS-CD8::GFP; R55B03-Gal4</i>                      | Raised at 25°C. Adults dissected between 0-7 days old.                                                     |
| 2 - S1 | J               | Marginal           | <i>w[1118]; UAS-CD8::GFP; R35E04-Gal4</i>                      | Raised at 25°C. Adults dissected between 0-7 days old.                                                     |
| 2 - S1 | K               | Proximal satellite | <i>w[1118]; UAS-CD8::GFP; R46H12-Gal4</i>                      | Raised at 25°C. Adults dissected between 0-7 days old.                                                     |
| 2 - S1 | L               | Pseudo-cartridge   | <i>w[1118]; UAS-CD8::GFP; R50A12-Gal4</i>                      | Raised at 25°C. Adults dissected between 0-7 days old.                                                     |
| 2 - S1 | M               | Fenestrated        | <i>w[1118]; UAS-CD8::GFP; R47G01-Gal4</i>                      | Raised at 25°C. Adults dissected between 0-7 days old.                                                     |
| 5 - S4 | H, H'           |                    |                                                                |                                                                                                            |
| 5      | C, D, D'        | Epithelial         | <i>y[1]w[*]; CG43795-GFP</i>                                   | Raised at 25°C. Adults dissected between 0-7 days old.                                                     |
| 5      | E, F, F'        | Marginal           | <i>w[1118]; UAS-nls::GFP; R35E04-Gal4</i>                      | Raised at 25°C. Adults dissected between 0-7 days old.                                                     |



|        |                                                |                         |                                                                                                   |                                                                                                                                                                                                    |
|--------|------------------------------------------------|-------------------------|---------------------------------------------------------------------------------------------------|----------------------------------------------------------------------------------------------------------------------------------------------------------------------------------------------------|
| 5      | G, H, H'                                       | Proximal satellite      | <i>w[1118]; UAS-nls::GFP; R46H12-Gal4</i>                                                         | Raised at 25°C. Adults dissected between 0-7 days old.                                                                                                                                             |
| 5 - S4 | K, K'                                          |                         |                                                                                                   |                                                                                                                                                                                                    |
| 6      | B, B', B'', D, D', D'', F, F', F''             | Astrocyte               | <i>w[1118]; UAS-nls::GFP; R86E01-Gal4</i>                                                         | Raised at 25°C. Adults dissected between 0-7 days old.                                                                                                                                             |
| 7      | C, C', C''                                     |                         |                                                                                                   |                                                                                                                                                                                                    |
| 5 - S2 | A, A', A''                                     |                         |                                                                                                   |                                                                                                                                                                                                    |
| 3 - S4 | A, A', A'', B, B', B'', B''', C, C', C'', C''' | All glia                | <i>w[1118]; UAS-nls::GFP; Repo-Gal4</i>                                                           | Raised at 25°C. Adults dissected between 0-7 days old.                                                                                                                                             |
| 3 - S4 | D, D'                                          | Neurons                 | <i>w[1118]/pBPhsFlp2;; Mi{Trojan-GAL4.1}Rdl[MI02957-TG4.1]/ UAS-HA_V5_FLAG</i>                    | Raised at 25°C before and after heat shocking. 6 hour after egg laying embryos were heat stocked at 37°C for 15 minutes, quenched at 4°C for 10 minutes, and reared at 25°C until larval hatching. |
| 4      | C, C'                                          | VNC perineurial glia    | <i>w[1118]/pBPhsFlp2;; Mi{Trojan-GAL4.1}CG6126[MI12300-TG4.1]/ UAS-HA_V5_FLAG</i>                 | Raised at 25°C before and after heat shocking. 6 hour after egg laying embryos were heat stocked at 37°C for 15 minutes, quenched at 4°C for 10 minutes, and reared at 25°C until larval hatching. |
| 4      | D, D'                                          | VNC MAP glia            | <i>w[1118]/pBPhsFlp2; TI{GFP[3xP3.cLa]=CRIMIC.TG4.2}CG5080[CR01346-TG4.2]/+; UAS-HA_V5_FLAG/+</i> | Raised at 25°C before and after heat shocking. 6 hour after egg laying embryos were heat stocked at 37°C for 15 minutes, quenched at 4°C for 10 minutes, and reared at 25°C until larval hatching. |
| 4      | E, E'                                          | VNC subperineurial glia | <i>w[1118]/pBPhsFlp2; moody-GAL4.SPG; UAS-HA_V5_FLAG/+</i>                                        | Raised at 25°C before and after heat shocking. 6 hour after egg laying embryos were heat stocked at 37°C for 15 minutes, quenched at 4°C for 10 minutes, and reared at 25°C until larval hatching. |
| 4      | F, F'                                          | VNC cortex glia         | <i>w[1118]/pBPhsFlp2; sp/+; R54H02-Gal4/UAS-HA_V5_FLAG</i>                                        | Raised at 25°C before and after heat shocking. 6 hour after egg laying embryos were heat stocked at 37°C for 15 minutes, quenched at 4°C for                                                       |

|        |       |                                     |                                                                                    |                                                                                                                                                                                                    |
|--------|-------|-------------------------------------|------------------------------------------------------------------------------------|----------------------------------------------------------------------------------------------------------------------------------------------------------------------------------------------------|
|        |       |                                     |                                                                                    | 10 minutes, and reared at 25°C until larval hatching.                                                                                                                                              |
| 4      | G, G' | VNC ensheathing glia                | <i>w[1118]/pBPhsFlp2; TI{CRIMIC.TG4.2}Eaat2[CR00503-TG4.2]/+; UAS-HA_V5_FLAG/+</i> | Raised at 25°C before and after heat shocking. 6 hour after egg laying embryos were heat stocked at 37°C for 15 minutes, quenched at 4°C for 10 minutes, and reared at 25°C until larval hatching. |
| 4      | H, H' | VNC astrocytes                      | <i>w[1118]/pBPhsFlp2;; alrm-Gal4/ UAS-HA_V5_FLAG</i>                               | Raised at 25°C before and after heat shocking. 6 hour after egg laying embryos were heat stocked at 37°C for 15 minutes, quenched at 4°C for 10 minutes, and reared at 25°C until larval hatching. |
| 4 - S1 | A, A' | VNC astrocytes and ensheathing glia | <i>w[1118]/pBPhsFlp2; sp/+; R25H07-Gal4/UAS-HA_V5_FLAG</i>                         | Raised at 25°C before and after heat shocking. 6 hour after egg laying embryos were heat stocked at 37°C for 15 minutes, quenched at 4°C for 10 minutes, and reared at 25°C until larval hatching. |
| 4 - S1 | B, B' | VNC astrocytes and ensheathing glia | <i>w[1118]/pBPhsFlp2; sp/+; PBac{GAL4D,EYFP}Tet[PL00243]/ UAS-HA_V5_FLAG</i>       | Raised at 25°C before and after heat shocking. 6 hour after egg laying embryos were heat stocked at 37°C for 15 minutes, quenched at 4°C for 10 minutes, and reared at 25°C until larval hatching. |
| 4 - S1 | C, C' | VNC astrocytes and ensheathing glia | <i>w[1118]/pBPhsFlp2; sp/+; PBac{IT.GAL4}pum[0508-G4]/ UAS-HA_V5_FLAG</i>          | Raised at 25°C before and after heat shocking. 6 hour after egg laying embryos were heat stocked at 37°C for 15 minutes, quenched at 4°C for 10 minutes, and reared at 25°C until larval hatching. |
| 4 - S1 | F, F' | VNC astrocytes                      | <i>w[1118] TI{RFP[3xP3.cUa]=TI}Tre1[attP];;</i>                                    | Raised at 25°C, dissected at 0 hours after larval hatching.                                                                                                                                        |
| 4 - S2 | A, A' | VNC ensheathing and cortex glia     | <i>w[1118]/pBPhsFlp2; TI{CRIMIC.TG4.2}ana[CR01446-TG4.2]/+; UAS-HA_V5_FLAG/+</i>   | Raised at 25°C before and after heat shocking. 6 hour after egg laying embryos were heat stocked at 37°C for 15 minutes, quenched at 4°C for 10 minutes, and reared at 25°C until larval hatching. |
| 4 - S2 | B, B' | VNC ensheathing glia and astrocytes | <i>pBPhsFlp2/TI{CRIMIC.TG4.2}CG9657[CR00636-TG4.2];; UAS-HA_V5_FLAG/+</i>          | Raised at 25°C before and after heat shocking. 6 hour after egg laying embryos were heat stocked at 37°C for 15 minutes, quenched at 4°C for                                                       |

|        |                                    |                              |                                                                                                   |                                                                                                                                                                                                    |
|--------|------------------------------------|------------------------------|---------------------------------------------------------------------------------------------------|----------------------------------------------------------------------------------------------------------------------------------------------------------------------------------------------------|
|        |                                    |                              |                                                                                                   | 10 minutes, and reared at 25°C until larval hatching.                                                                                                                                              |
| 4 - S2 | C, C'                              | VNC cortex glia              | <i>w[1118]/pBPhsFlp2;; TI{CRIMIC.TG4.0}CG9449[CR01691-TG4.0]/ UAS- HA_V5_FLAG</i>                 | Raised at 25°C before and after heat shocking. 6 hour after egg laying embryos were heat stocked at 37°C for 15 minutes, quenched at 4°C for 10 minutes, and reared at 25°C until larval hatching. |
| 4 - S3 | A, A'                              | VNC perineurial and MAP glia | <i>w[1118]/pBPhsFlp2; TI{GFP[3xP3.cLa]=CRIMIC.TG4.2}CG5080[CR01346-TG4.2]/+; UAS-HA_V5_FLAG/+</i> | Raised at 25°C before and after heat shocking. 6 hour after egg laying embryos were heat stocked at 37°C for 15 minutes, quenched at 4°C for 10 minutes, and reared at 25°C until larval hatching. |
| 4 - S3 | B, B'                              | VNC perineurial glia         | <i>w[1118]/pBPhsFlp2; TI{CRIMIC.TG4.2}pippin[CR01460-TG4.2]/+; UAS-HA_V5_FLAG/+</i>               | Raised at 25°C before and after heat shocking. 6 hour after egg laying embryos were heat stocked at 37°C for 15 minutes, quenched at 4°C for 10 minutes, and reared at 25°C until larval hatching. |
| 4 - S3 | C, C'                              | VNC subperineurial glia      | <i>w[1118]/pBPhsFlp2;; Mi{Trojan-GAL4.2}tl[MIO2191-TG4.2] / UAS-HA_V5_FLAG</i>                    | Raised at 25°C before and after heat shocking. 6 hour after egg laying embryos were heat stocked at 37°C for 15 minutes, quenched at 4°C for 10 minutes, and reared at 25°C until larval hatching. |
| 4 - S3 | D, D'                              | VNC subperineurial glia      | <i>w[1118]/pBPhsFlp2; TI{CRIMIC.TG4.2}PRL-1[CR00881-TG4.2]/+; UAS-HA_V5_FLAG/+</i>                | Raised at 25°C before and after heat shocking. 6 hour after egg laying embryos were heat stocked at 37°C for 15 minutes, quenched at 4°C for 10 minutes, and reared at 25°C until larval hatching. |
| 5 - S2 | B, B', B'', C, C', C'', D, D', D'' | Cortex                       | <i>w[1118]; UAS-nls::GFP; R54H02-Gal4</i>                                                         | Raised at 25°C. Adults dissected between 0-7 days old.                                                                                                                                             |
| 5 - S2 | E, E', E'', F, F', F''             | Chiasm                       | <i>w[1118]; UAS-nls::GFP; R53H12-Gal4</i>                                                         | Raised at 25°C. Adults dissected between 0-7 days old.                                                                                                                                             |
| 5 - S4 | A, B, B', G, G'                    |                              |                                                                                                   |                                                                                                                                                                                                    |
| 5 - S3 | A, A', A'', B, B', B'',            | Perineurial                  | <i>w[1118]; UAS-nls::GFP; R85G01-Gal4</i>                                                         | Raised at 25°C. Adults dissected between 0-7 days old.                                                                                                                                             |

|        |                                                |             |                                                 |                                                                                                           |
|--------|------------------------------------------------|-------------|-------------------------------------------------|-----------------------------------------------------------------------------------------------------------|
|        | F, F', F''                                     |             |                                                 |                                                                                                           |
| 5 - S4 | C, D, D'                                       |             |                                                 |                                                                                                           |
| 5 - S3 | G, G', G'', H, H', H'', I, I', I'', J, J', J'' | Ensheathing | <i>w[1118]; UAS-nls::GFP; R56F03-Gal4</i>       | Raised at 25°C. Adults dissected between 0-7 days old.                                                    |
| 5 - S3 | C, C'                                          | <i>ltl</i>  | <i>y[1]w[*]/w[*]; ; ltl-Gal4/UAS-myr::GFP</i>   | Raised at 25°C. Adults dissected between 0-7 days old.                                                    |
| 5 - S3 | D, E                                           | <i>ltl</i>  | <i>w[*]/pBPhsFlp2;; ltl-Gal4/UAS-HA_V5_FLAG</i> | Raised at 18°C before and after heat shocking. 0-5 day-old adults were heat shocked at 37°C for 1 minute. |
| 5 - S4 | L, L'                                          |             |                                                 |                                                                                                           |
| 5 - S4 | J, J'                                          | Fenestrated | <i>w[1118]; UAS-nls::GFP; R47G01-Gal4</i>       | Raised at 25°C. Adults dissected between 0-7 days old.                                                    |
